# Supplementary material for: Metal-free synthesis of aminomethylated imidazoheterocycles: dual role of tert-butyl hydroperoxide as both an oxidant and a methylene source
Source: Royal Society of Chemistry journal article supplement (doi:10.1039/c8ob02432d), 2018-01-01

## **Supporting Information**

### **Metal-Free Synthesis of Aminomethylated Imidazoheterocycles: Dual Role of *tert*-Butyl Hydroperoxide both as an Oxidant and Methylene Source**

Om P. S. Patel, Nitesh Kumar Nandwana, Ajay Kumar Sah and Anil Kumar\*

Department of Chemistry, BITS Pilani, Pilani Campus 333031, Rajasthan, India

#### **Corresponding Author**

\*anilkumar@pilani.bits-pilani.ac.in

#### **Table of Contents**

1. Radical trapping experiments and supporting ESI-HRMS analysis data
2. Unambiguous molecular structure determination of **3aa** via 1D and 2D NMR spectroscopy
3. Copies of  $^1\text{H}$  and  $^{13}\text{C}$  NMR and ESI-HRMS data

## 1. Radical trapping experiments

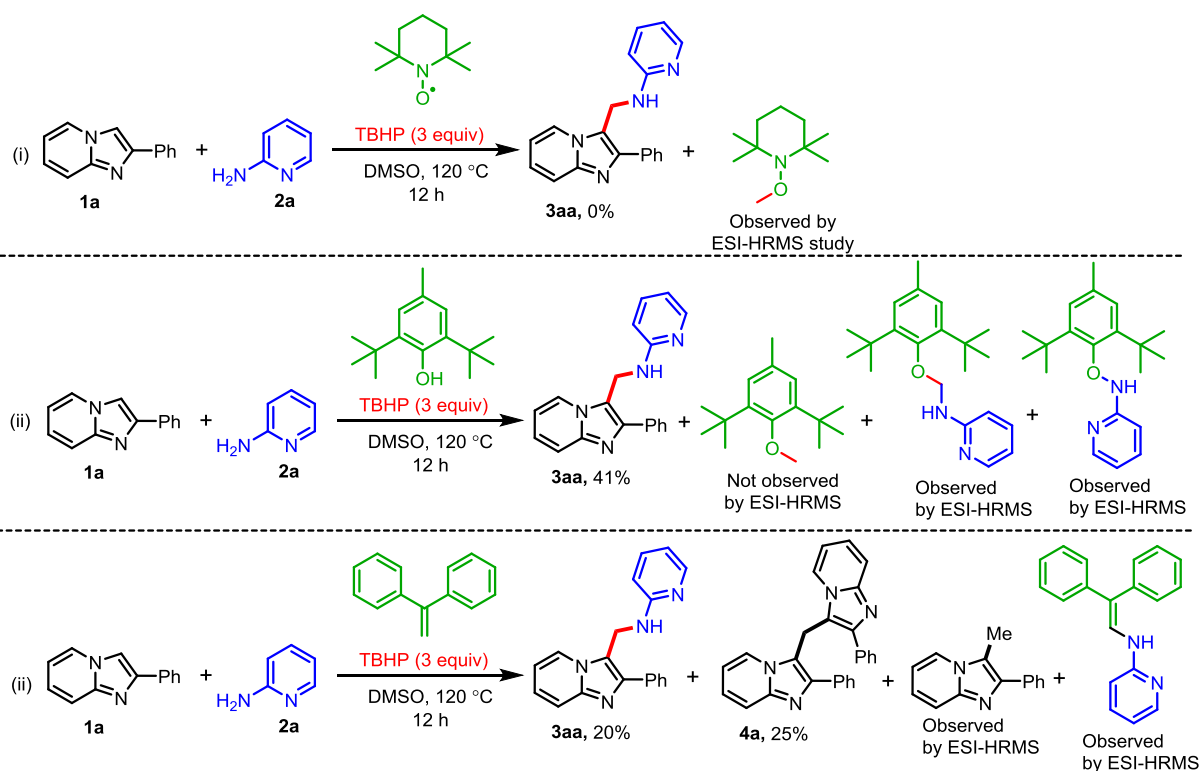

To a stirred solution of 2-phenylimidazo[1,2-*a*]pyridine **1a** (0.8 mmol) in DMSO (5 mL) were added 2-aminopyridine **2a** (1 mmol), *t*-BuOOH (70% aqueous solution) (2.4 mmol) and TEMPO/BHT/DPE (5 equiv.) at room temperature and the reaction mixture was stirred at 120 °C for 12 h. The reaction mixture was allowed to attain room temperature and poured into 20 mL of water and extracted with EtOAc (3 × 15 mL). The combined organic layer was dried over Na<sub>2</sub>SO<sub>4</sub> and evaporated under vacuum. The resulting crude solid was purified over silica gel (60-120 mesh) column chromatography by using EtOAc-*n*-hexane (4.0:6.0, *v/v*) to afford **3aa** in 0, 41% and 20% yields in case of TEMPO, BHT and DPE, respectively. The same reaction mixtures were directly analysed by ESI-HRMS analysis to observe the corresponding intermediates and adducts of radical scavengers such as TEMPO, BHT and 1,1-DPE.

## ESI-HRMS of crude reaction mixture of TEMPO adduct:

| Sample Name   | OSP-TEMPO (6h)   | Position    | P2-C4                | Instrument Name | Instrument 1 | User Name              |                      |
|---------------|------------------|-------------|----------------------|-----------------|--------------|------------------------|----------------------|
| Inj Vol       | 0.2              | InjPosition |                      | SampleType      | Sample       | IRM Calibration Status | Success              |
| Data Filename | OSP-TEMPO (6h).d | ACQ Method  | water_acn_grad_6min. | Comment         |              | Acquired Time          | 3/16/2018 6:35:10 PM |

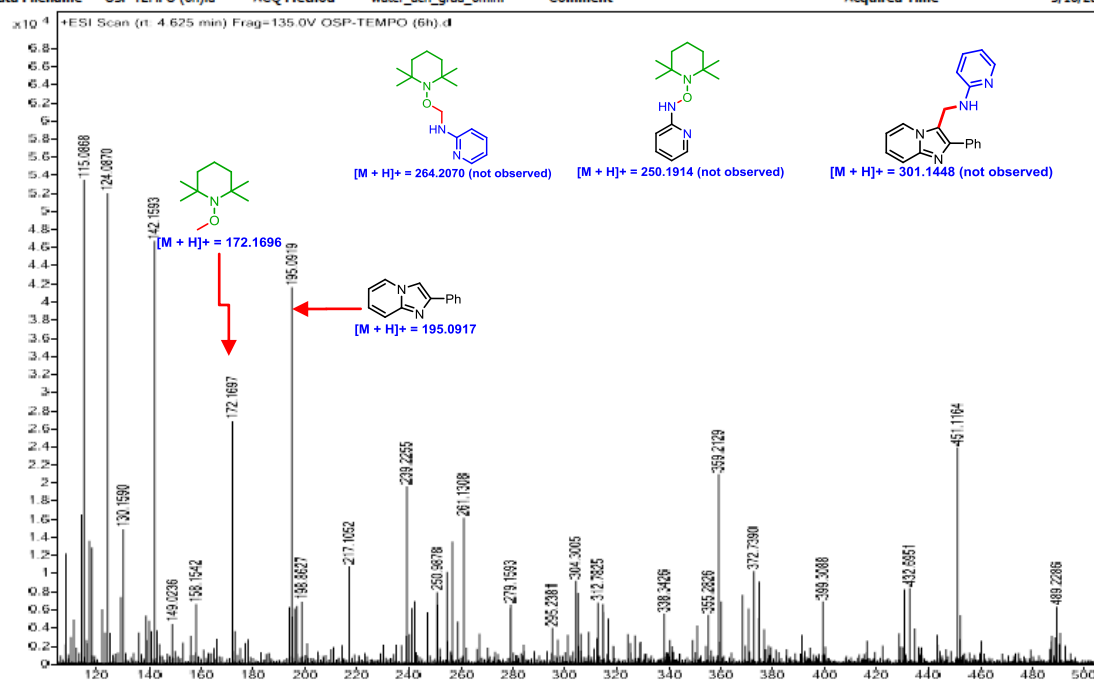

## ESI-HRMS of crude reaction mixture of BHT adduct:

| Sample Name   | OSP-BHT (6h)   | Position    | P2-C6                | Instrument Name | Instrument 1 | User Name              |                      |
|---------------|----------------|-------------|----------------------|-----------------|--------------|------------------------|----------------------|
| Inj Vol       | 0.2            | InjPosition |                      | SampleType      | Sample       | IRM Calibration Status | Success              |
| Data Filename | OSP-BHT (6h).d | ACQ Method  | water_acn_grad_6min. | Comment         |              | Acquired Time          | 3/16/2018 6:49:19 PM |

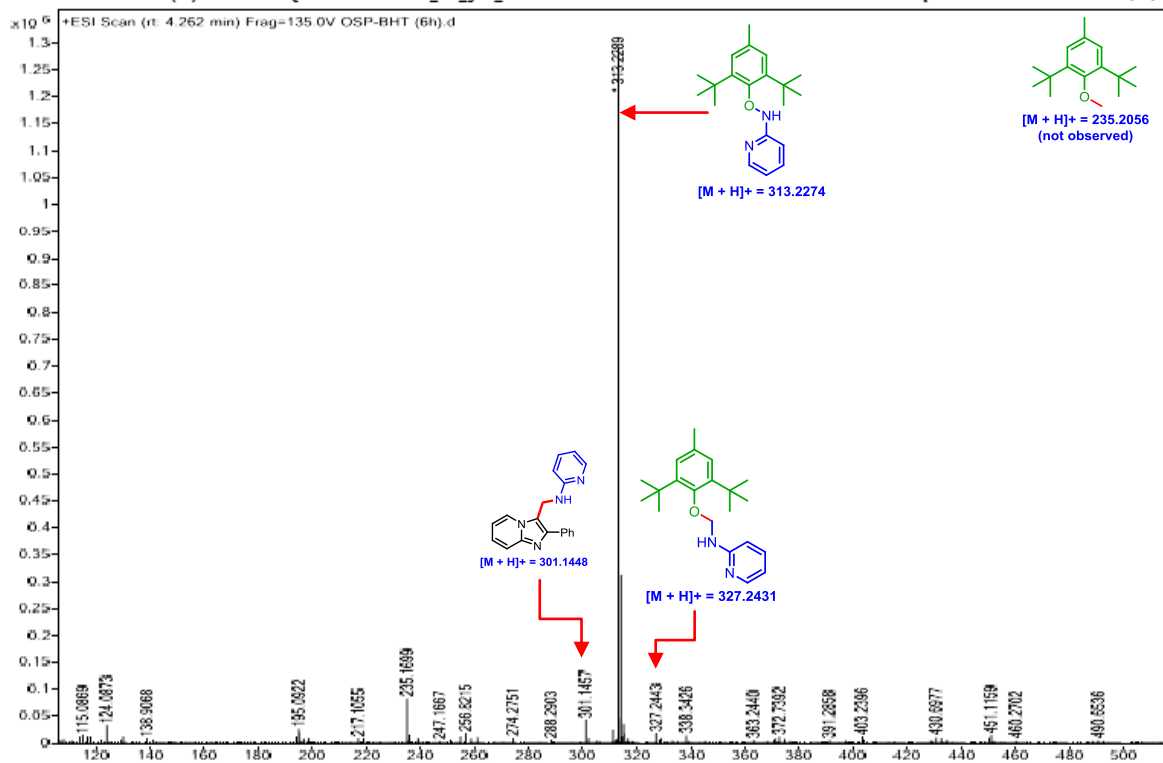

## ESI-HRMS of crude reaction mixture of 1,1-DPE adduct:

| Sample Name   | OSP-DPE-C   | Position    | P1-B10               | Instrument Name | Instrument 1 | User Name              |                       |
|---------------|-------------|-------------|----------------------|-----------------|--------------|------------------------|-----------------------|
| Inj Vol       | 0.25        | InjPosition |                      | SampleType      | Sample       | IRM Calibration Status | Success               |
| Data Filename | OSP-DPE-C.d | ACQ Method  | ChB60ChD40Dual AJS E | Comment         |              | Acquired Time          | 10/20/2018 3:48:37 PM |

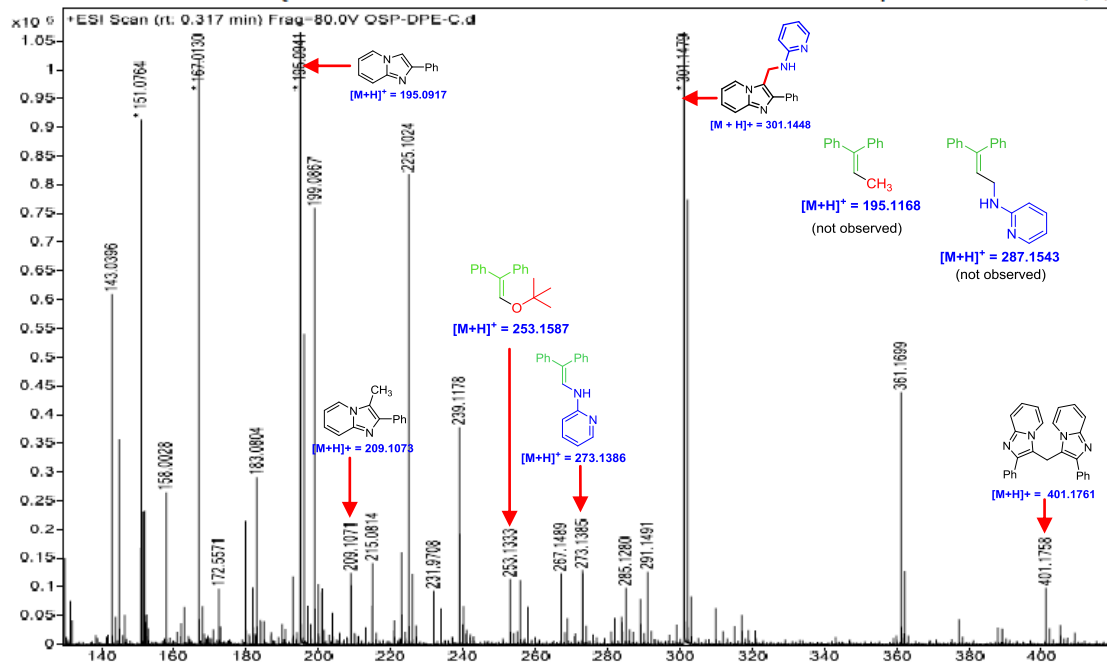

## 2. Unambiguous molecular structure determination of 3aa via 1D and 2D NMR spectroscopy

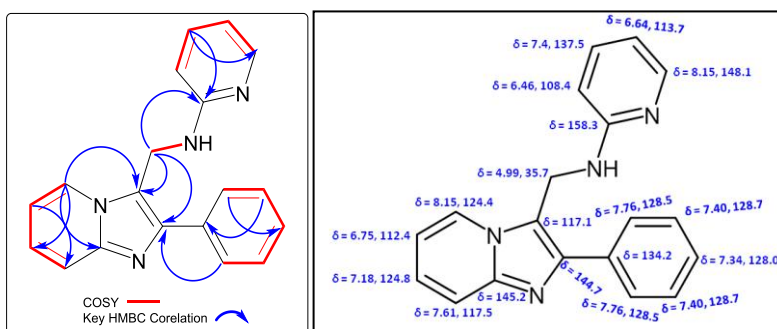



### 3. Copies of NMR and ESI-HRMS data

Mar31-2018/1  
OSP-28

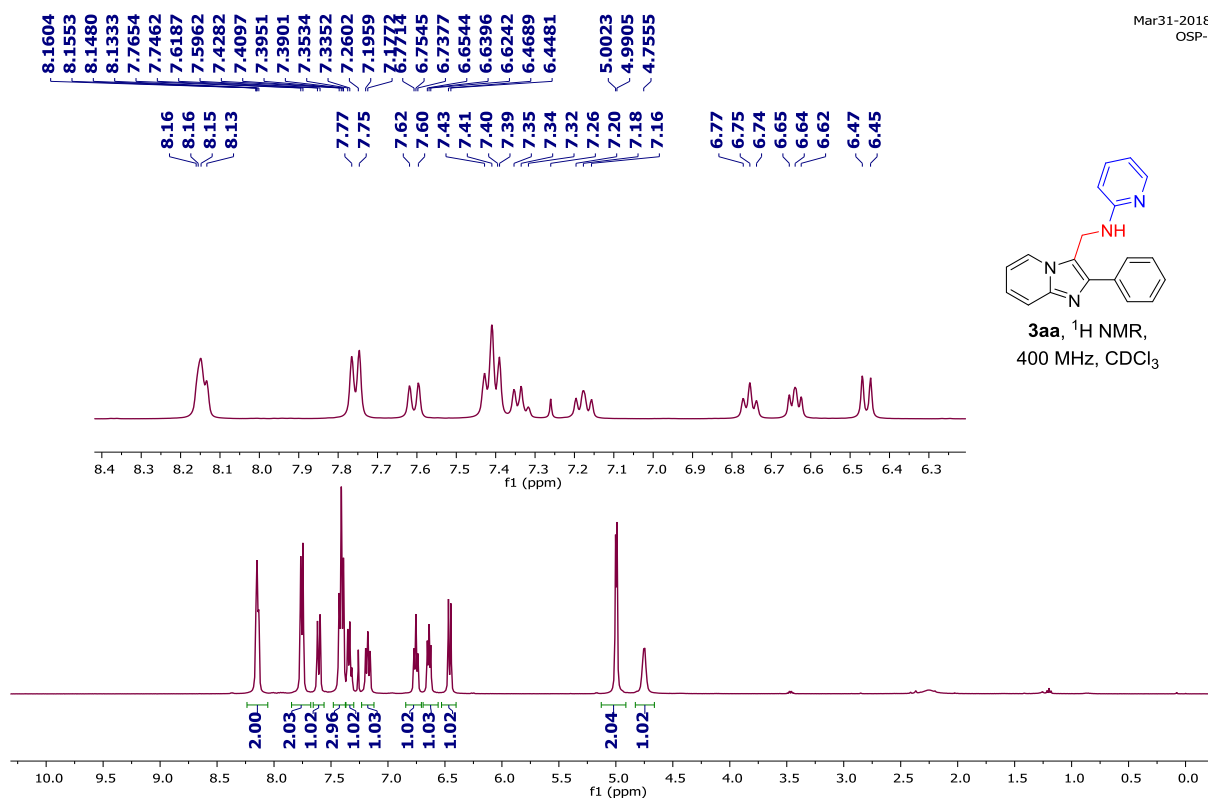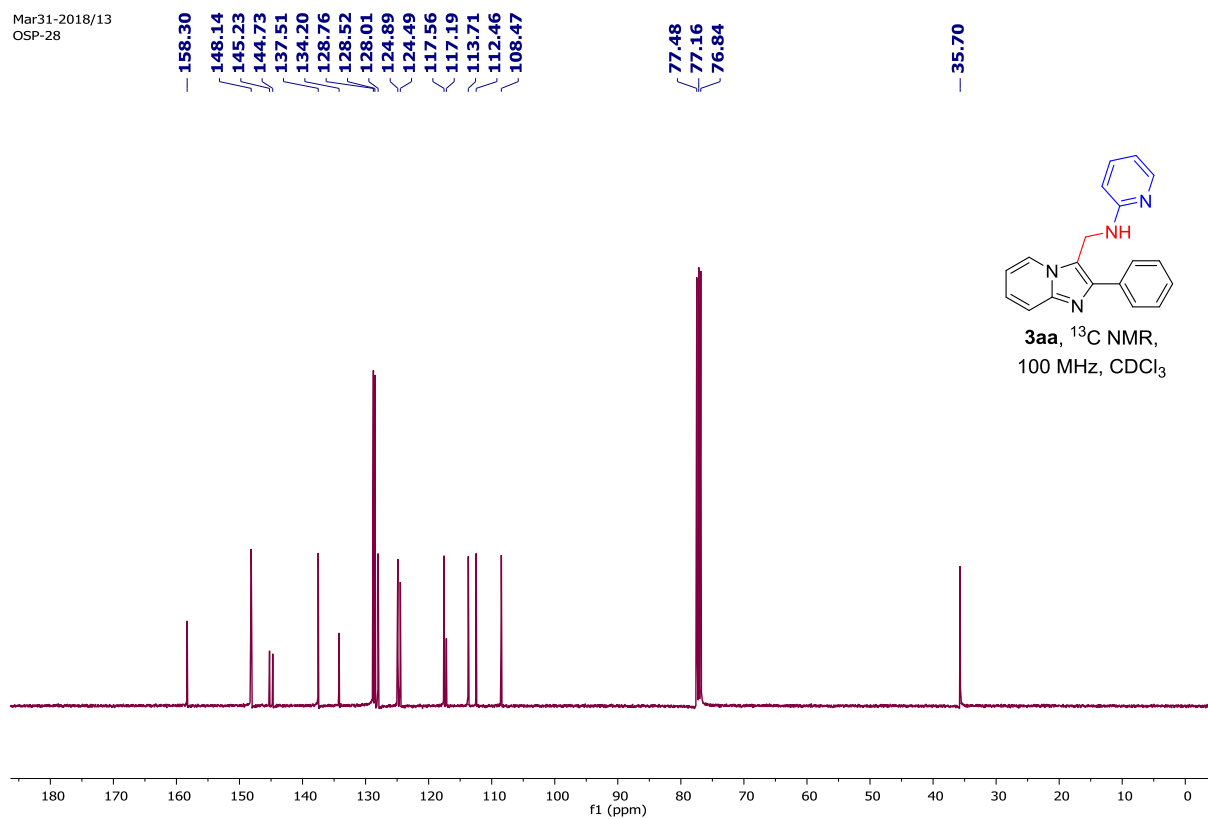

Sep26-2017  
OSP-28 II

— 148.16

— 137.58

128.82

128.54

128.07

124.99

124.50

117.58

113.77

112.54

108.50

— 35.70

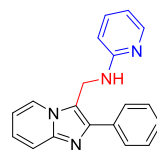

**3aa**, DEPT-135,  
100 MHz, CDCl<sub>3</sub>

60 150 140 130 120 110 100 90 80 70 60 50 40 30 20 10 0

f1 (ppm)

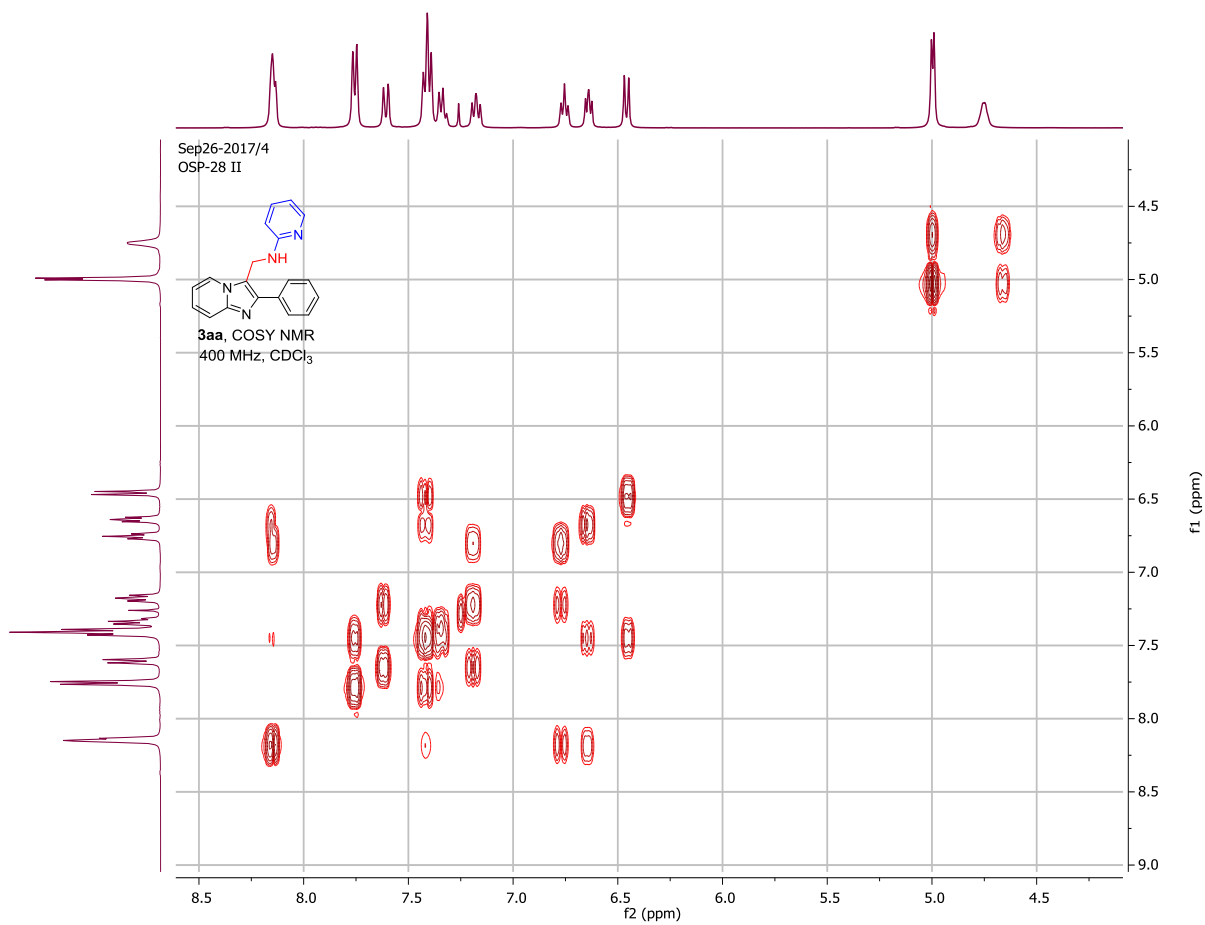

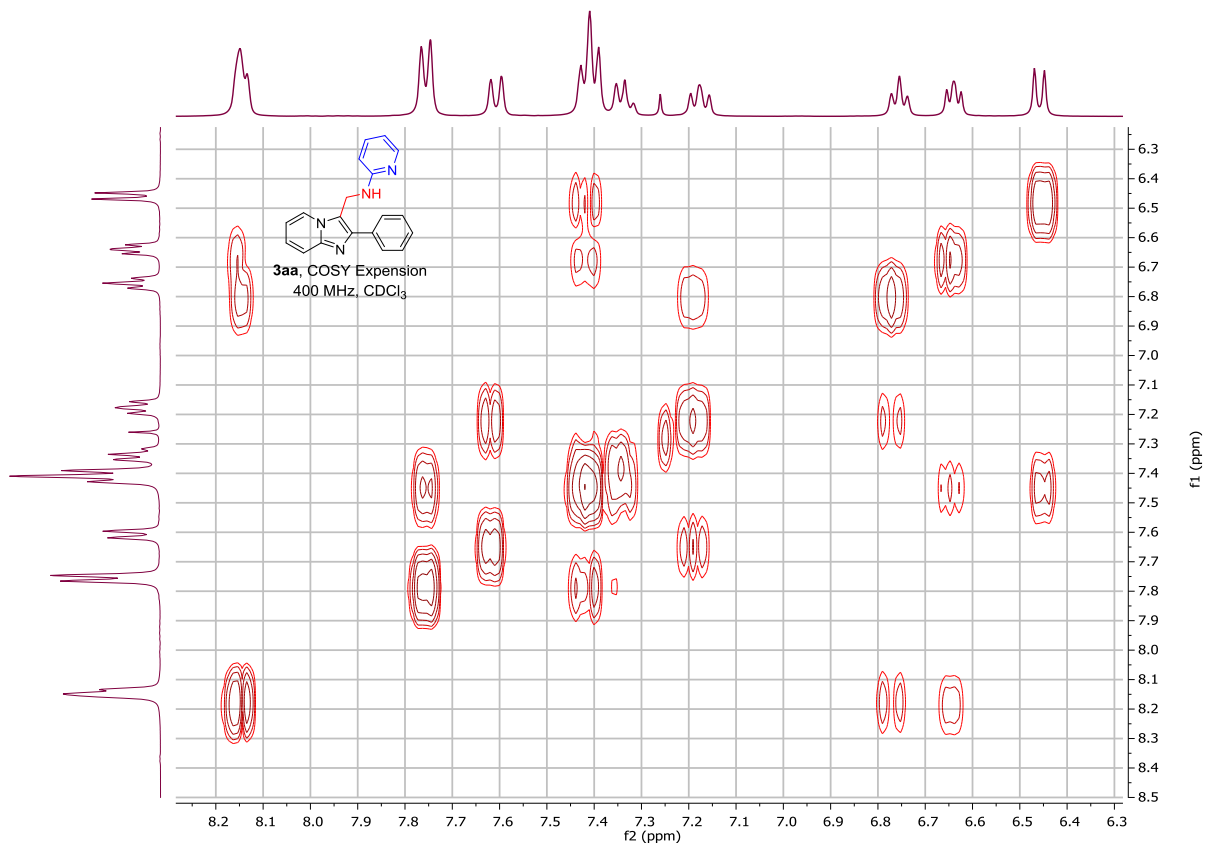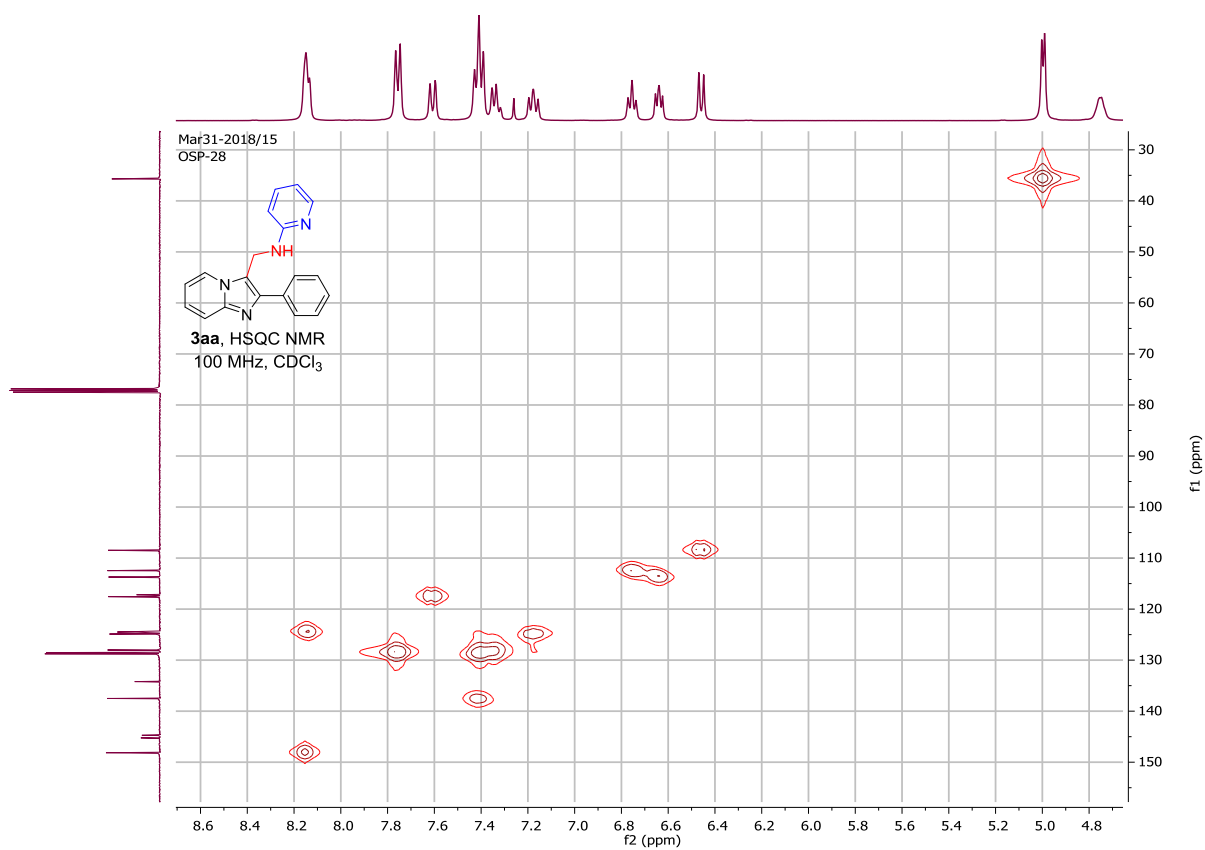

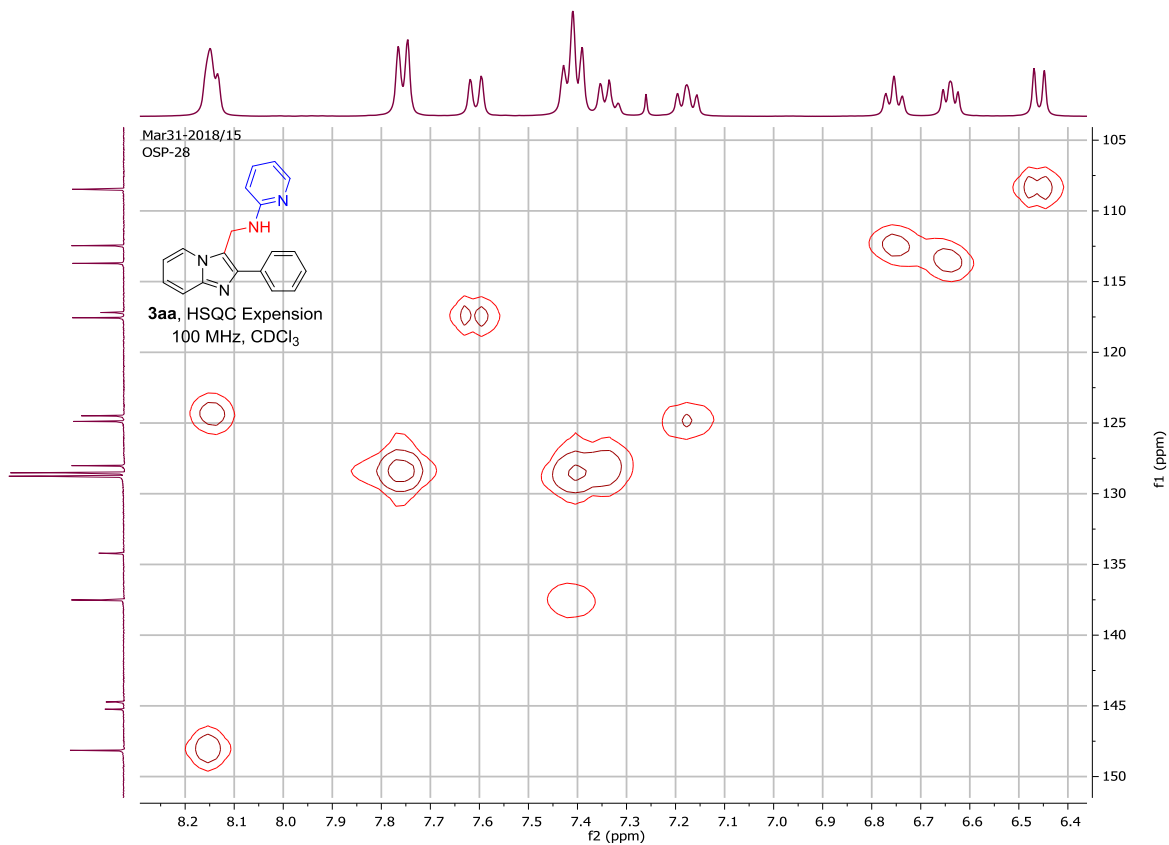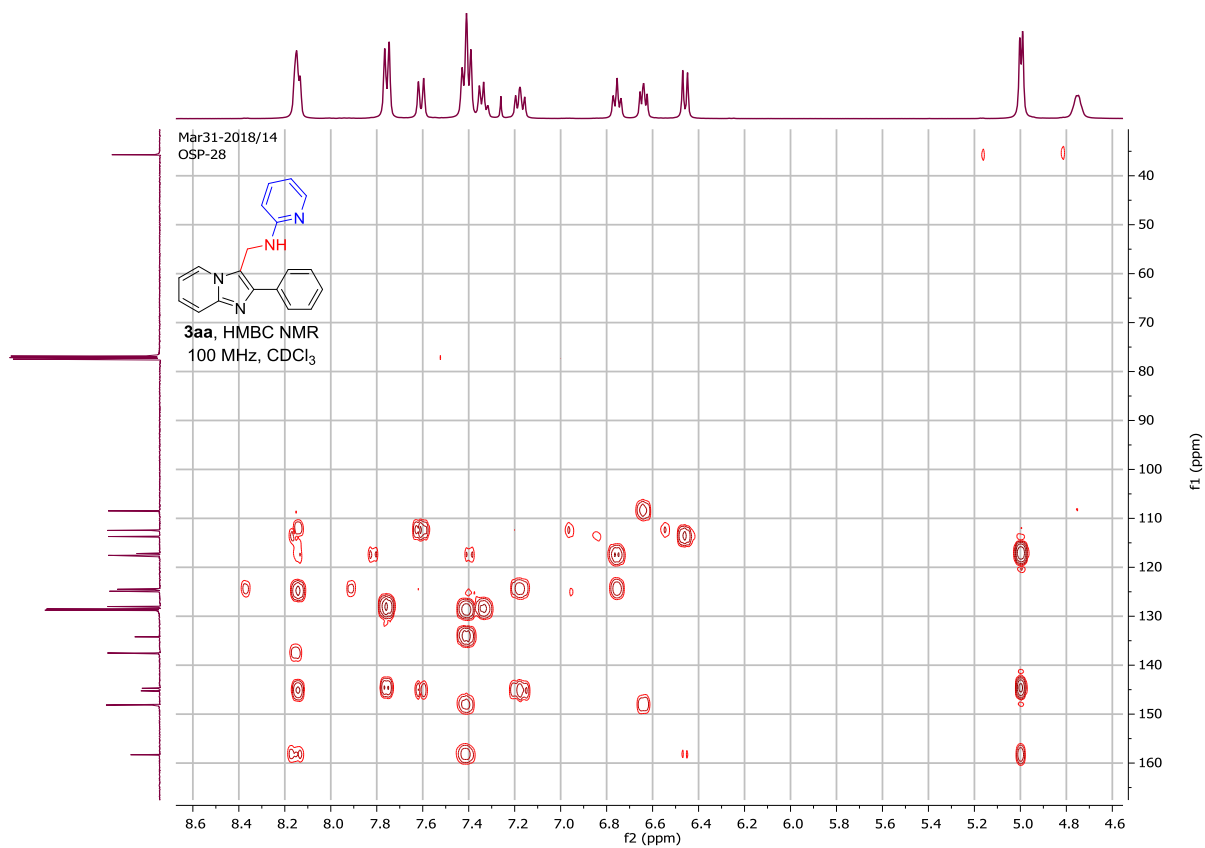

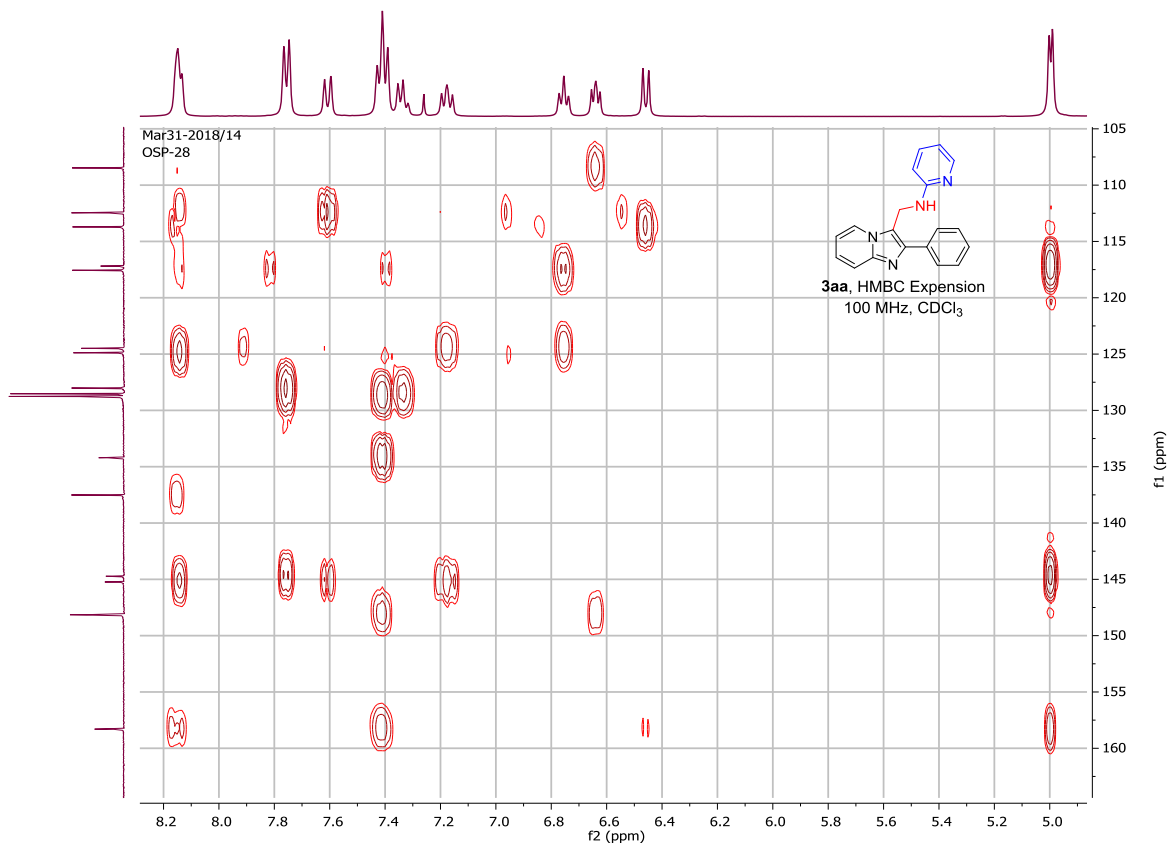

| Sample Name   | OSP-28   | Position    | P1-D4                | Instrument Name | Instrument 1 | User Name              |                       |
|---------------|----------|-------------|----------------------|-----------------|--------------|------------------------|-----------------------|
| Inj Vol       | 0.2      | InjPosition |                      | SampleType      | Sample       | IRM Calibration Status | Success               |
| Data Filename | OSP-28.d | ACQ Method  | water_acn_grad_6min_ | Comment         |              | Acquired Time          | 9/22/2017 10:35:47 PM |

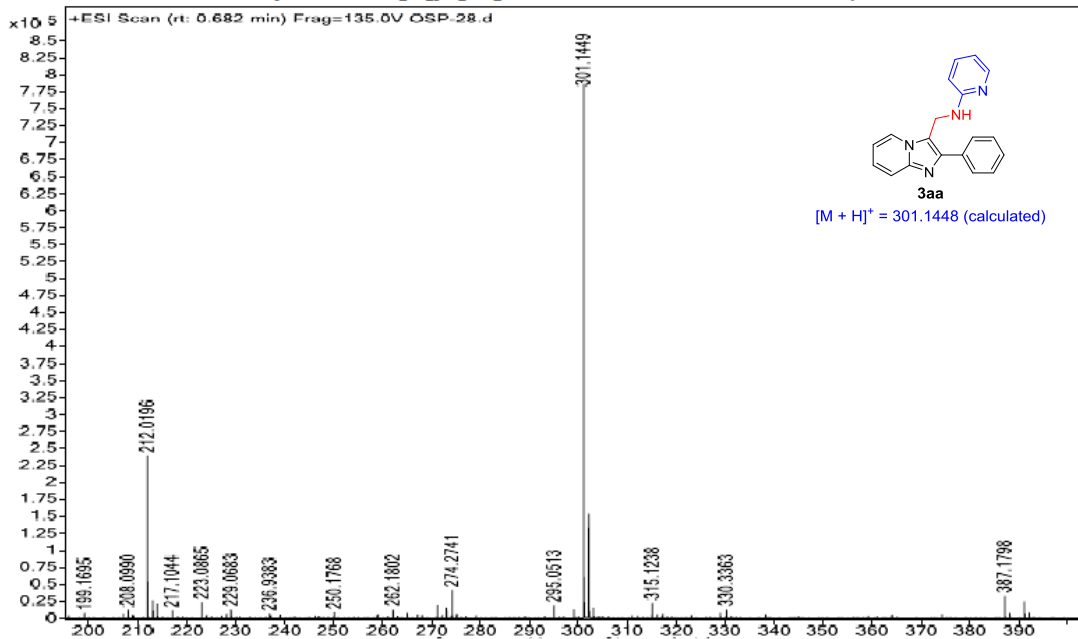

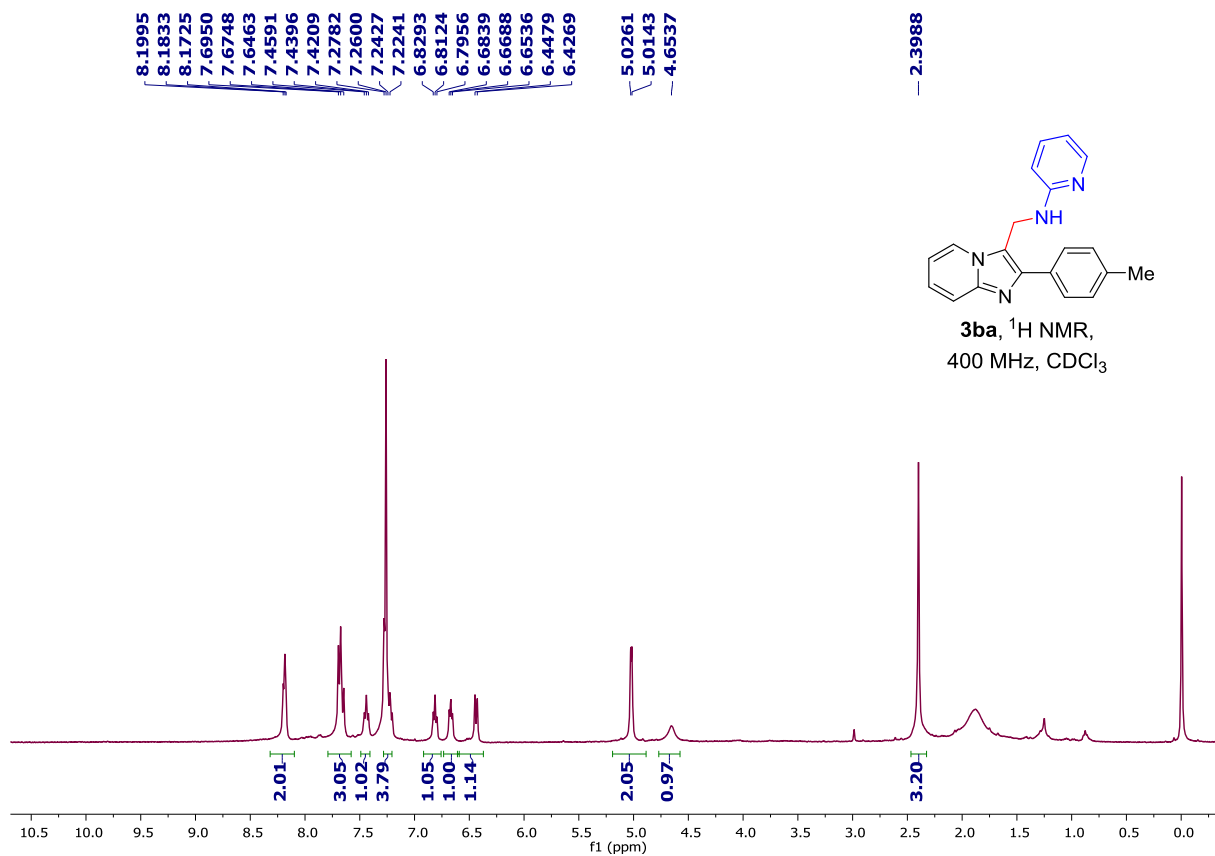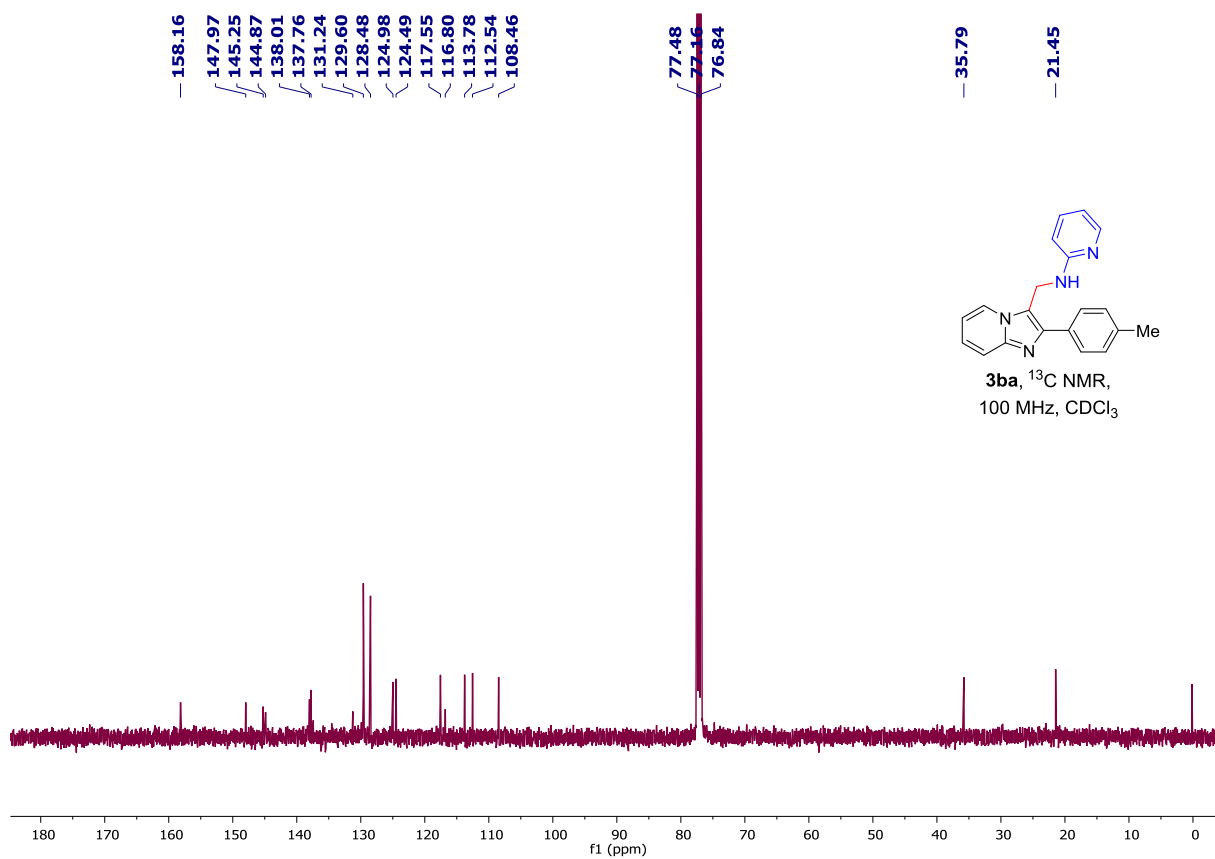

|               |          |             |                      |                 |              |                        |                      |
|---------------|----------|-------------|----------------------|-----------------|--------------|------------------------|----------------------|
| Sample Name   | OSP-63   | Position    | P2-E7                | Instrument Name | Instrument 1 | User Name              |                      |
| Inj Vol       | 0.25     | InjPosition |                      | SampleType      | Sample       | IRM Calibration Status | Success              |
| Data Filename | OSP-63.d | ACQ Method  | water_scn_grad_6min_ | Comment         |              | Acquired Time          | 12/8/2017 1:40:21 PM |

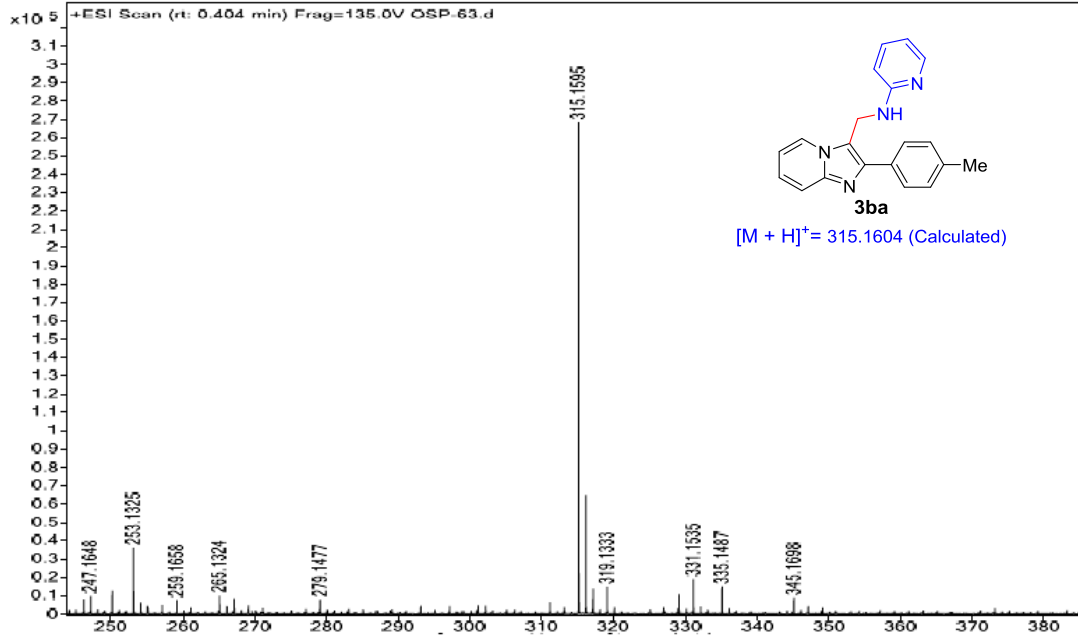

8.1633  
 8.1586  
 8.1503  
 8.1457  
 8.1109  
 8.0939  
 7.6898  
 7.6681  
 7.5986  
 7.5761  
 7.4462  
 7.4414  
 7.4282  
 7.4243  
 7.4205  
 7.4076  
 7.4027  
 7.3599  
 7.1875  
 7.1697  
 7.1493  
 6.9444  
 6.9227  
 6.7646  
 6.7481  
 6.7317  
 6.6605  
 6.6477  
 6.6427  
 6.6299  
 6.4892  
 6.4684  
 4.9619  
 4.9502  
 4.8159  
 4.8038  
 4.7915  
 3.8214

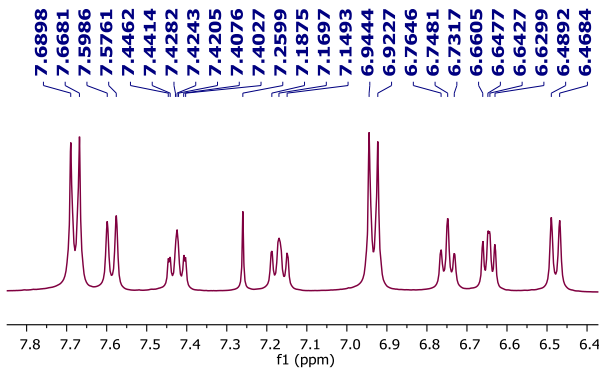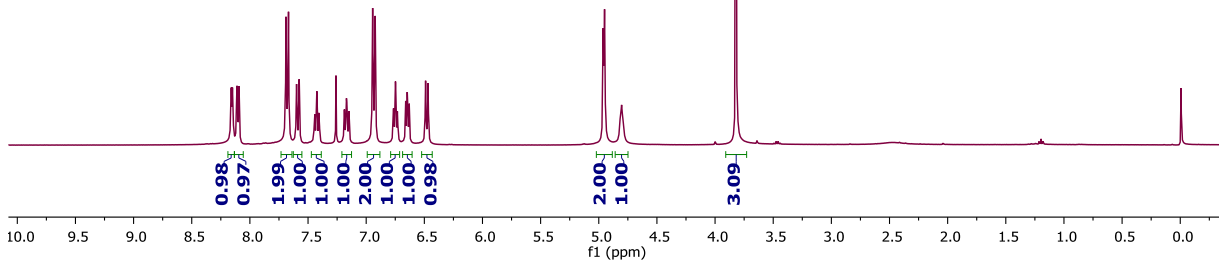

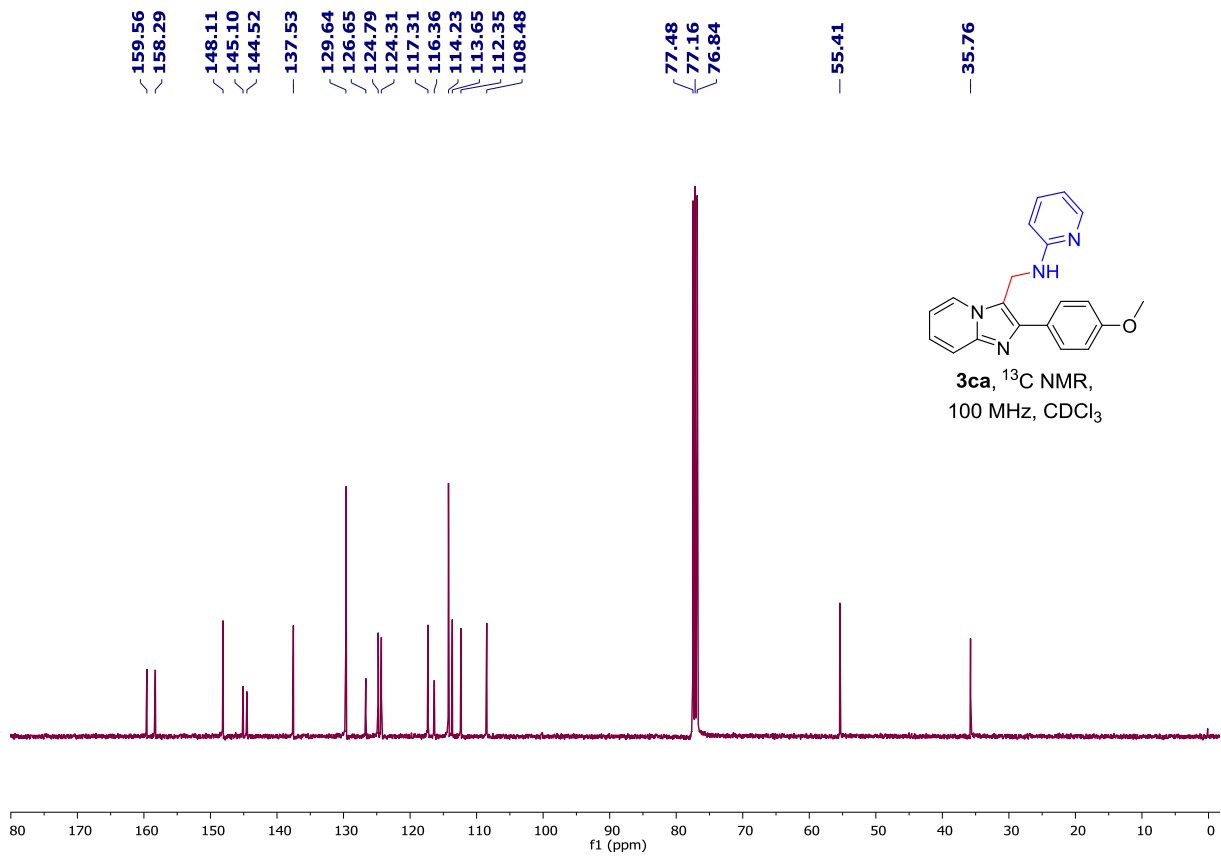

| Sample Name   | OSP-42   | Position    | P2-F3                | Instrument Name | Instrument 1 | User Name              |                       |
|---------------|----------|-------------|----------------------|-----------------|--------------|------------------------|-----------------------|
| Inj Vol       | 0.2      | InjPosition |                      | SampleType      | Sample       | IRM Calibration Status | Success               |
| Data Filename | OSP-42.d | ACQ Method  | water_acn_grad_6min_ | Comment         |              | Acquired Time          | 10/12/2017 5:30:15 PM |

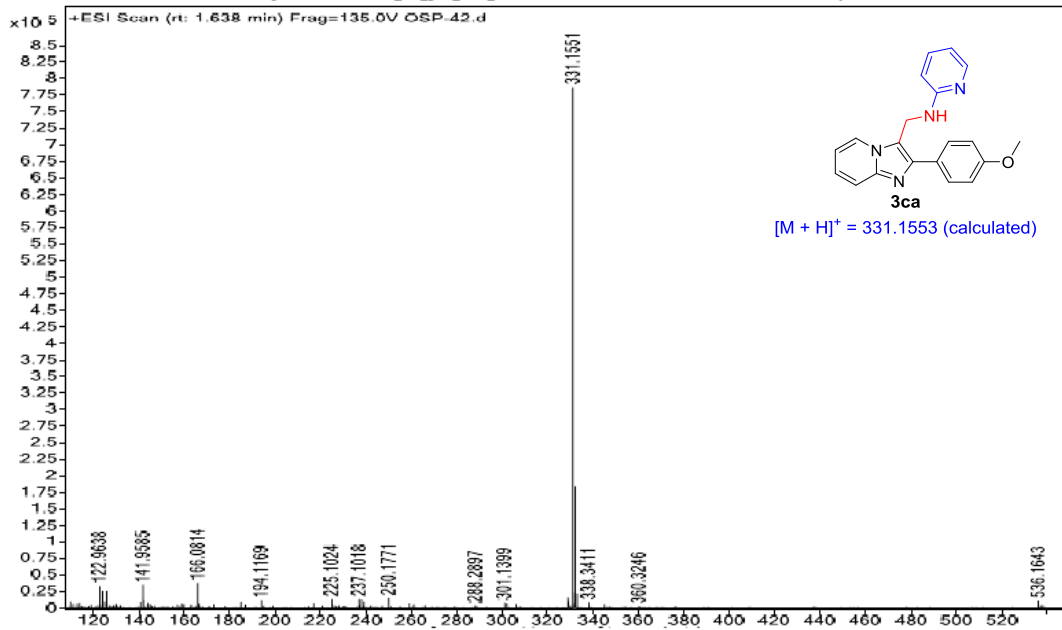



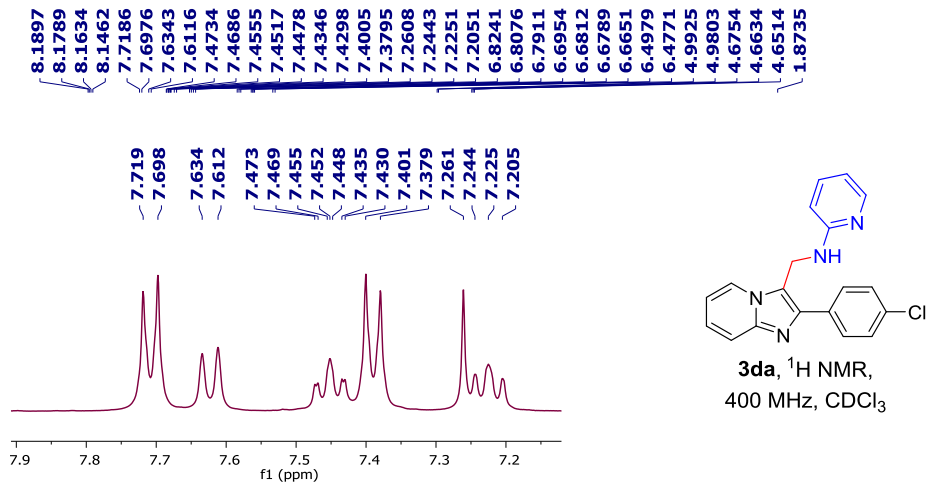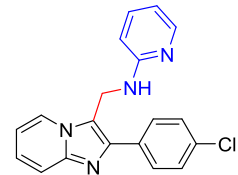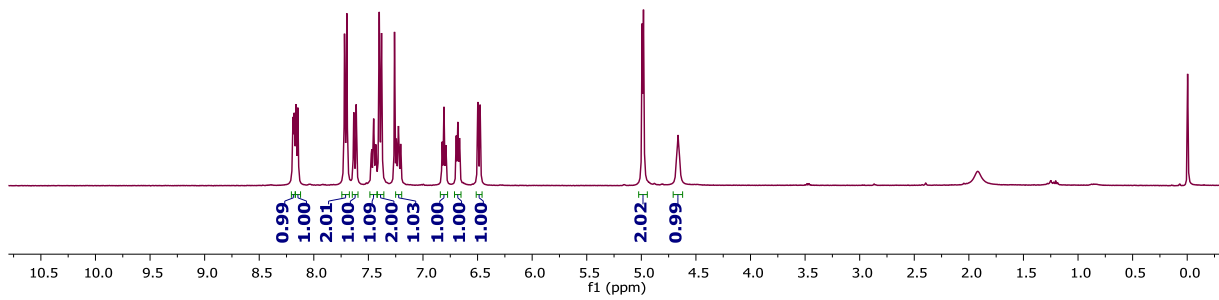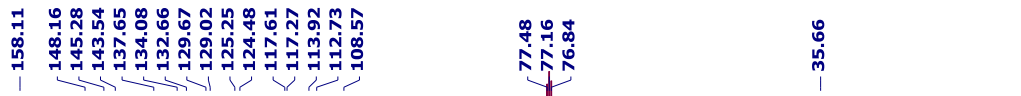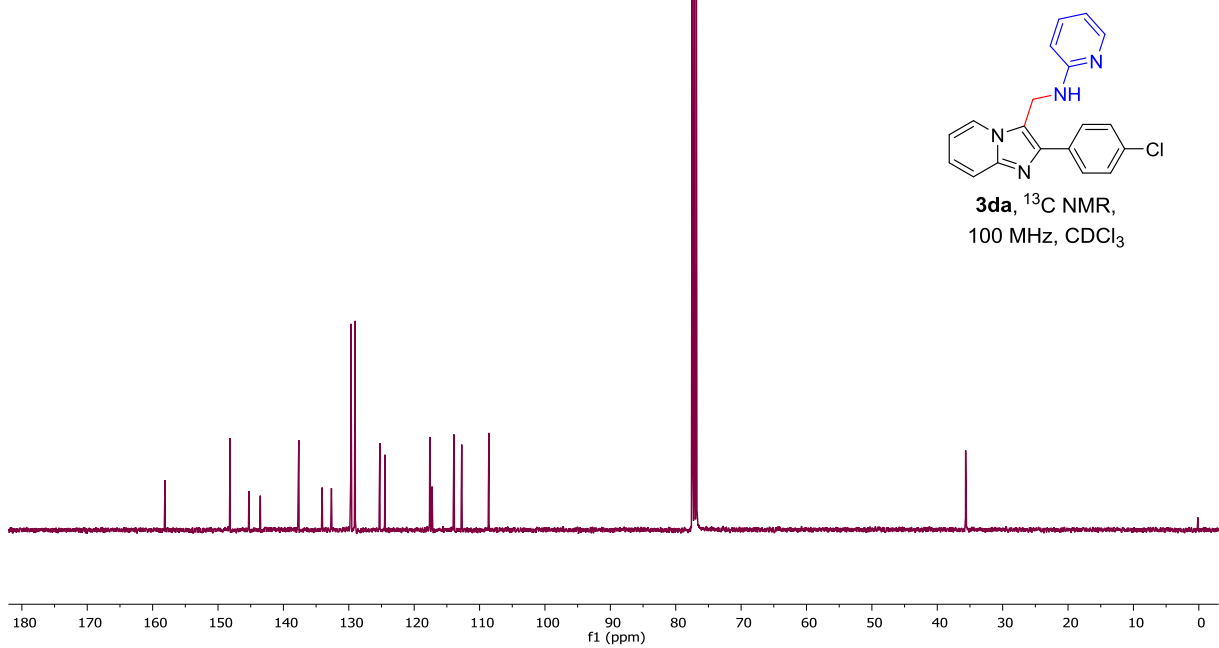

|               |          |             |                      |                 |              |                        |                       |
|---------------|----------|-------------|----------------------|-----------------|--------------|------------------------|-----------------------|
| Sample Name   | OSP-43   | Position    | P2-F4                | Instrument Name | Instrument 1 | User Name              |                       |
| Inj Vol       | 0.2      | InjPosition |                      | SampleType      | Sample       | IRM Calibration Status | Success               |
| Data Filename | OSP-43.d | ACQ Method  | water_acn_grad_6min_ | Comment         |              | Acquired Time          | 10/12/2017 5:44:24 PM |

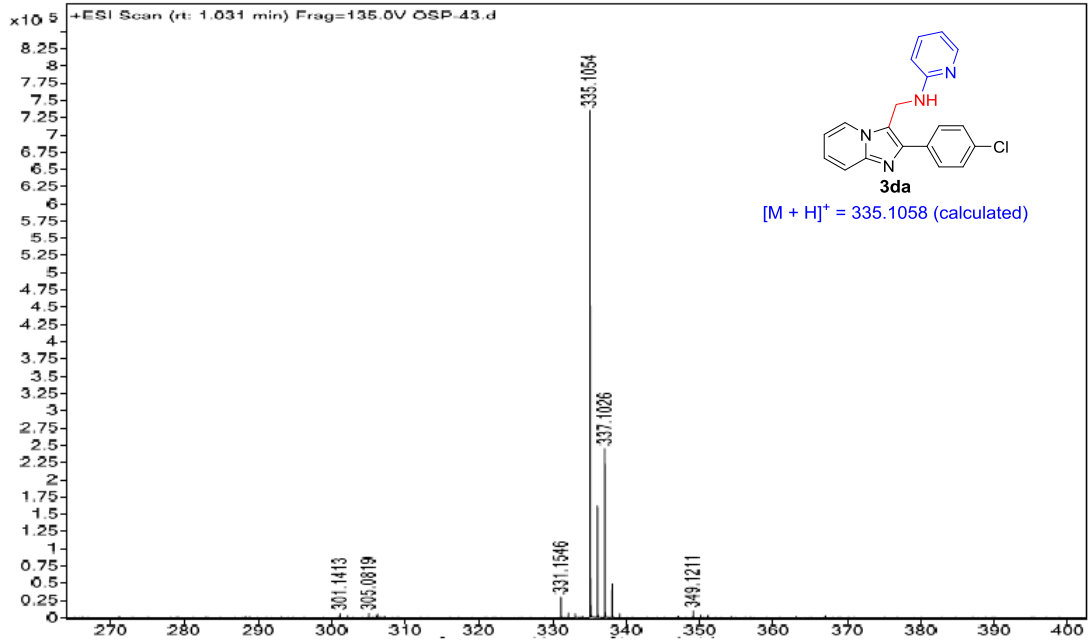

8.1856  
 8.1833  
 8.1808  
 8.1787  
 8.1730  
 8.1707  
 8.1679  
 8.1658  
 8.1382  
 8.1352  
 8.1321  
 8.1210  
 8.1181  
 8.1150  
 7.6320  
 7.6271  
 7.6155  
 7.6108  
 7.6047  
 7.5913  
 7.5885  
 7.5857  
 7.5268  
 7.5216  
 7.5101  
 7.5055  
 7.4534  
 7.4502  
 7.4485  
 7.4455  
 7.2616  
 7.2301  
 7.2270  
 7.2133  
 7.2102  
 7.2074  
 6.8047  
 6.7907  
 6.7877  
 6.6908  
 6.6885  
 6.6779  
 6.6756  
 6.6727  
 6.6705  
 6.6602  
 6.6579  
 6.5197  
 6.5172  
 6.5148  
 6.4989  
 6.4964  
 4.9697  
 4.9576  
 4.7851

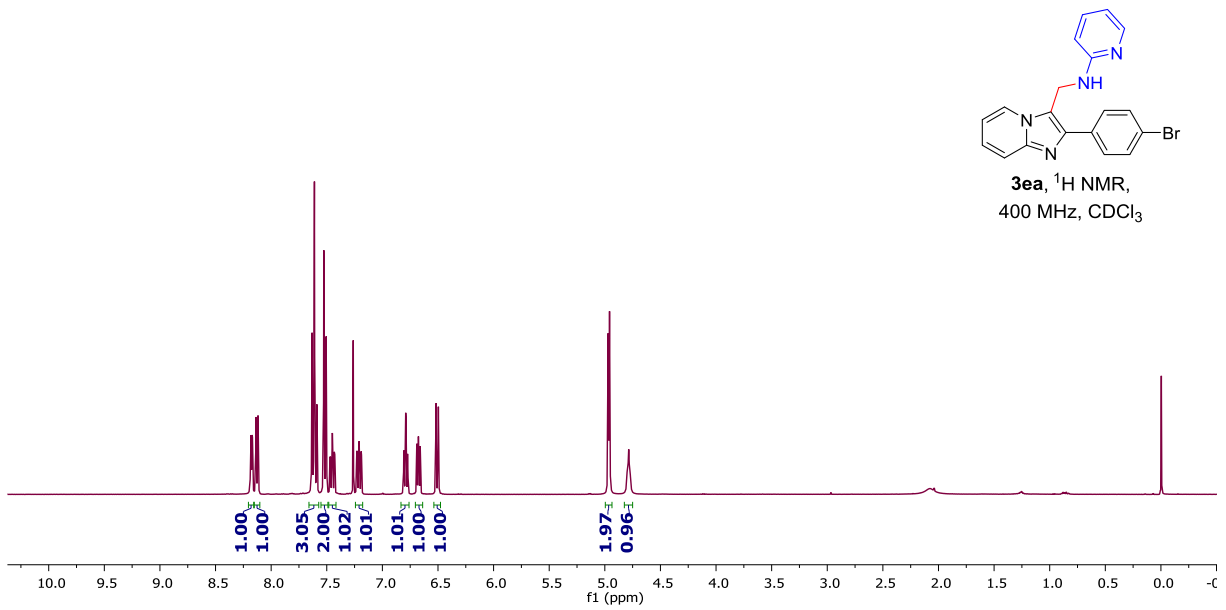

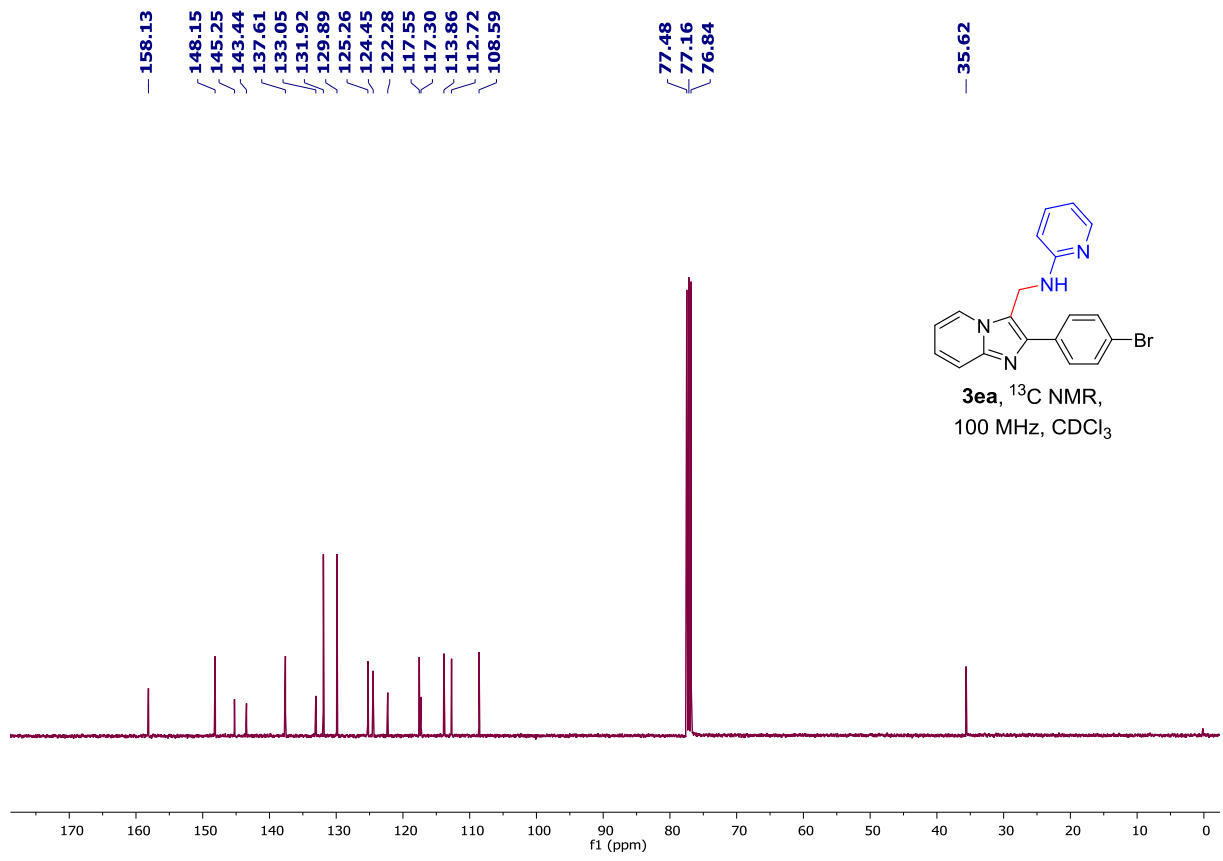

|               |         |             |                      |                 |              |                        |                       |
|---------------|---------|-------------|----------------------|-----------------|--------------|------------------------|-----------------------|
| Sample Name   | OSP48   | Position    | P2-F6                | Instrument Name | Instrument 1 | User Name              |                       |
| Inj Vol       | 0.2     | InjPosition |                      | SampleType      | Sample       | IRM Calibration Status | Success               |
| Data Filename | OSP48.d | ACQ Method  | water_acn_grad_6min_ | Comment         |              | Acquired Time          | 10/12/2017 6:12:40 PM |

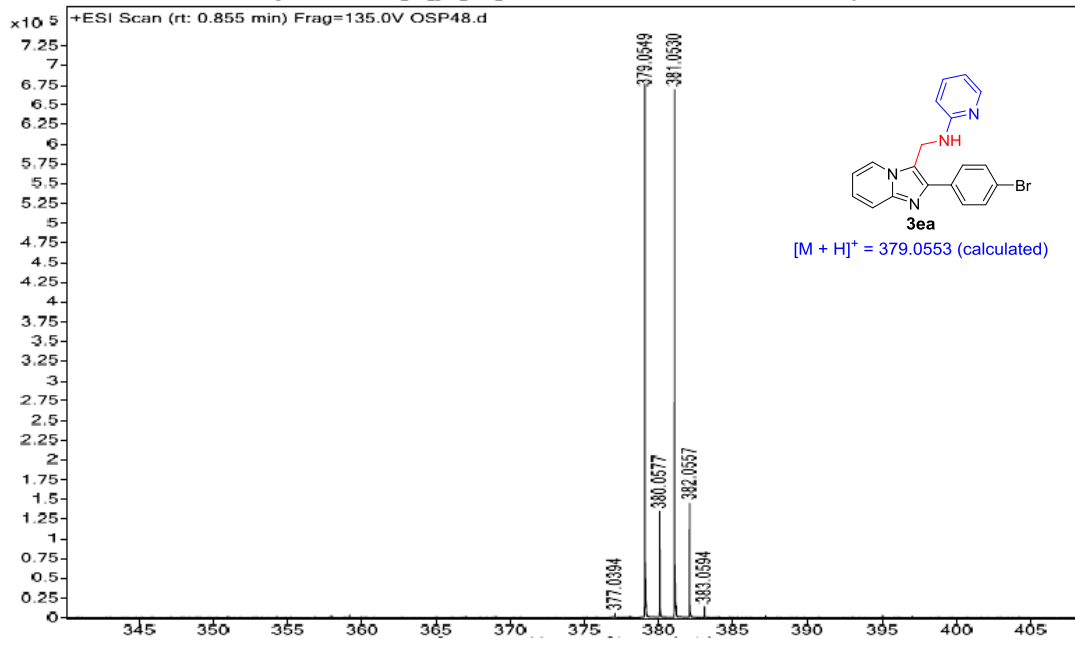

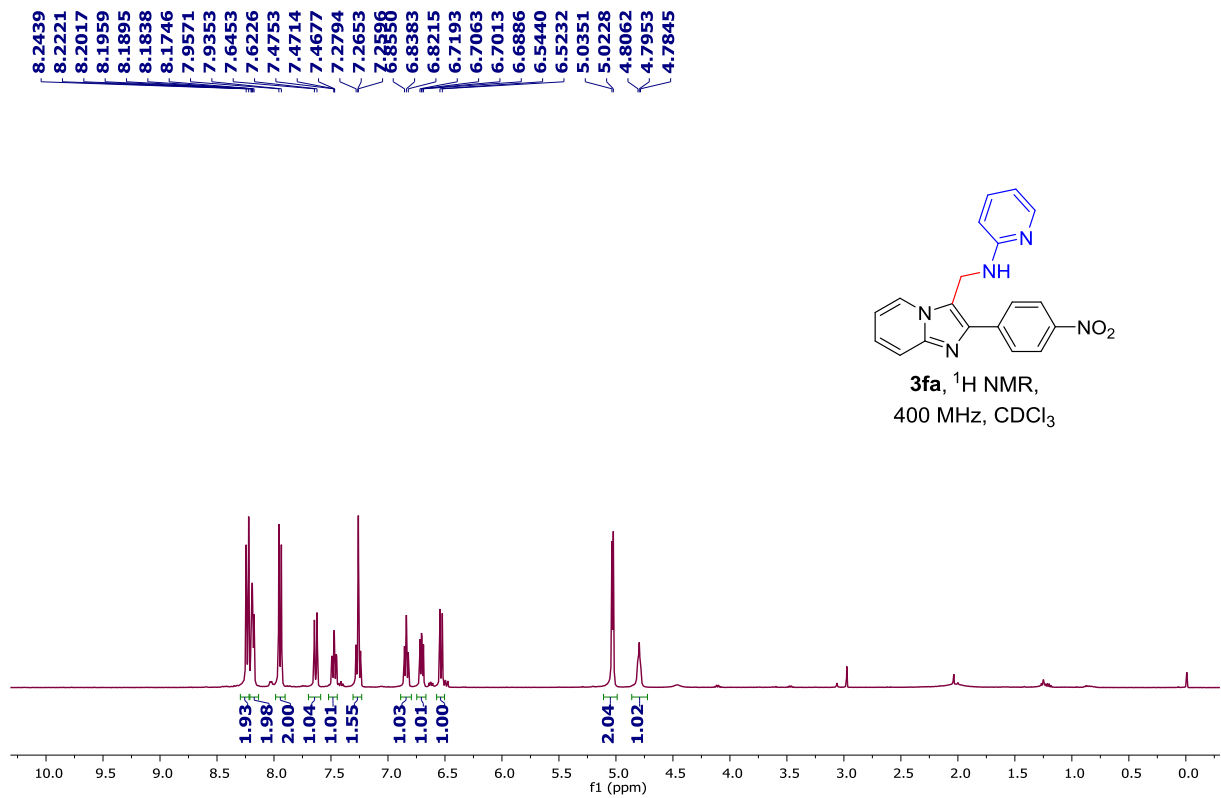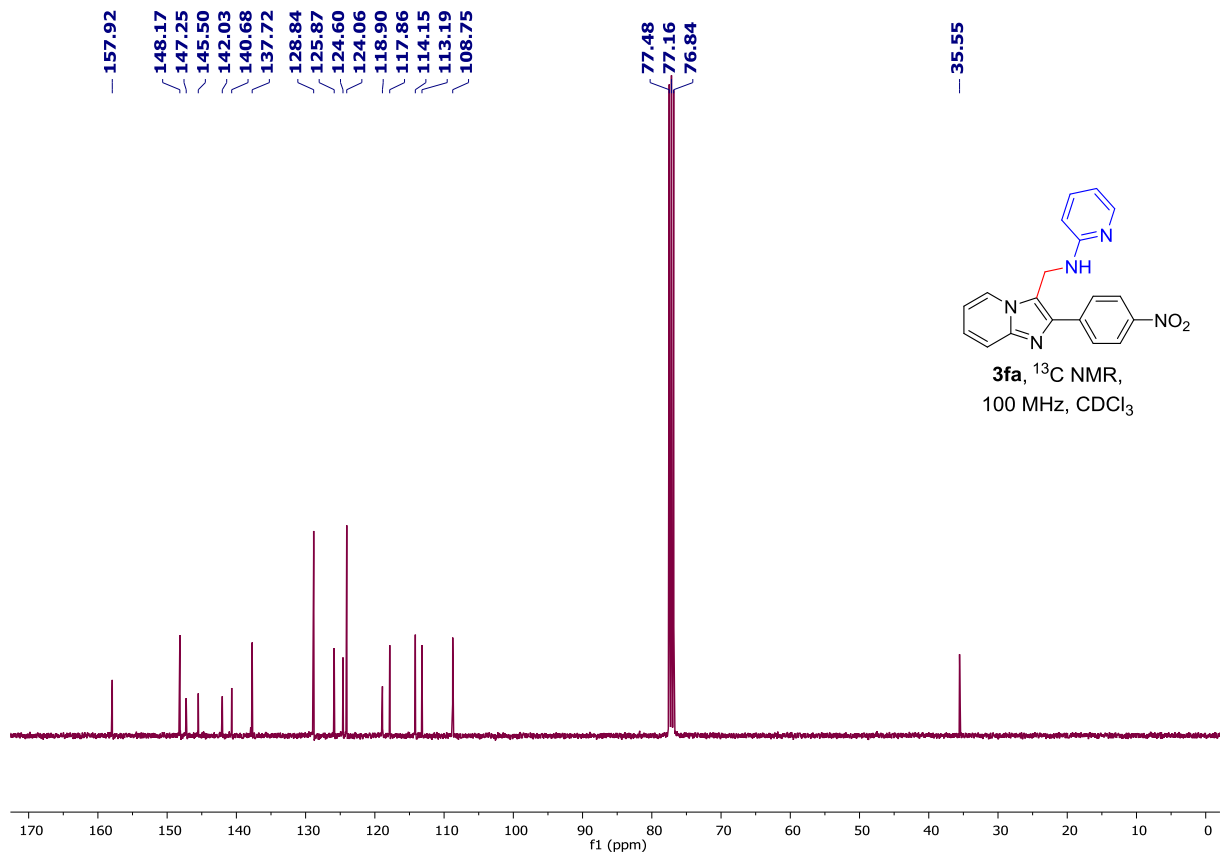

|               |          |             |                      |                 |              |                        |                     |
|---------------|----------|-------------|----------------------|-----------------|--------------|------------------------|---------------------|
| Sample Name   | OSP-72   | Position    | P2-C8                | Instrument Name | Instrument 1 | User Name              |                     |
| Inj Vol       | 0.25     | InjPosition |                      | SampleType      | Sample       | IRM Calibration Status | Success             |
| Data Filename | OSP-72.d | ACQ Method  | Methanol_isocratic.m | Comment         |              | Acquired Time          | 2/2/2018 6:06:49 PM |

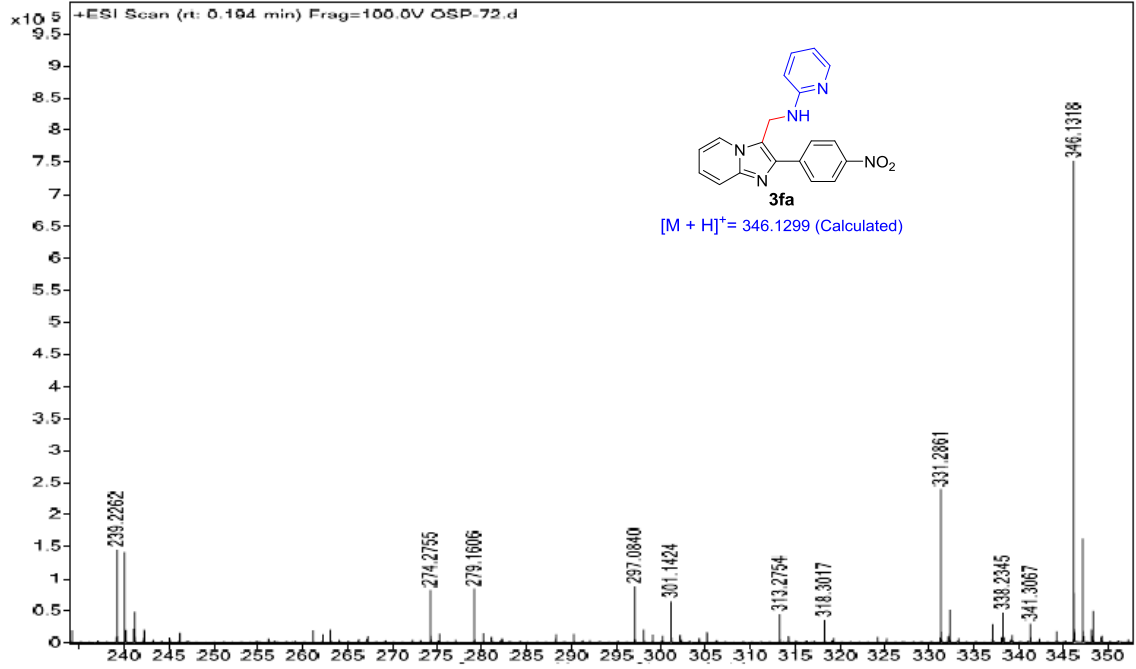

8.1756  
 8.1709  
 8.1626  
 8.1582  
 8.1417  
 8.1246  
 7.8440  
 7.8232  
 7.6189  
 7.5980  
 7.5927  
 7.5718  
 7.4770  
 7.4547  
 7.4383  
 7.2600  
 7.2458  
 7.2294  
 7.2253  
 7.2215  
 7.2064  
 6.8193  
 6.8023  
 6.7853  
 6.6980  
 6.6849  
 6.6675  
 6.5472  
 8.5295

Apr13-2018/1  
 OSP-11f

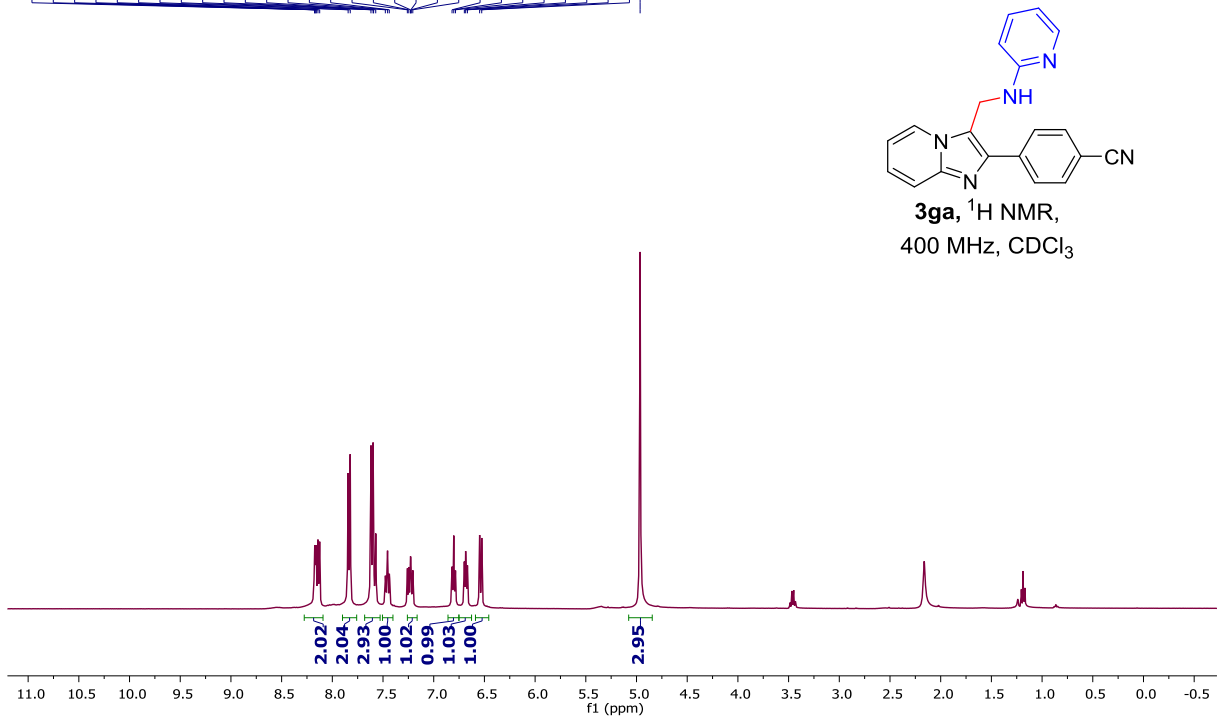

Apr13-2018/6  
OSP-116

157.99  
148.10  
145.35  
142.25  
138.62  
137.64  
132.45  
128.64  
125.72  
124.54  
118.97  
118.52  
117.67  
114.00  
113.06  
111.26  
108.72

77.48  
77.16  
76.84

35.46

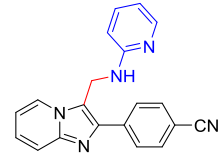

**3ga**,  $^{13}\text{C}$  NMR,  
100 MHz,  $\text{CDCl}_3$

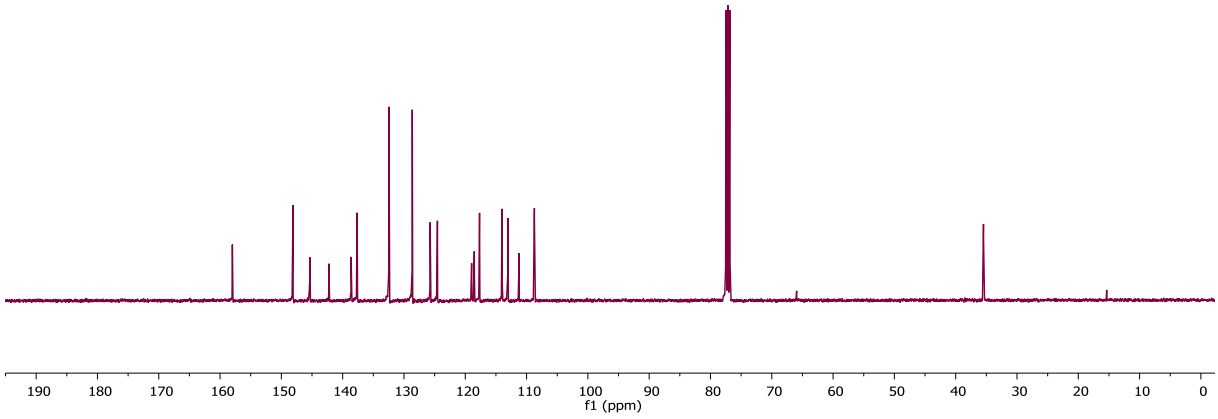

| Sample Name   | OSP-116   | Position    | P2-D9                | Instrument Name | Instrument 1 | User Name              |                      |
|---------------|-----------|-------------|----------------------|-----------------|--------------|------------------------|----------------------|
| Inj Vol       | 1         | InjPosition |                      | SampleType      | Sample       | IRM Calibration Status | Success              |
| Data Filename | OSP-116.d | ACQ Method  | water_acn_grad_6min_ | Comment         |              | Acquired Time          | 4/12/2018 4:24:15 PM |

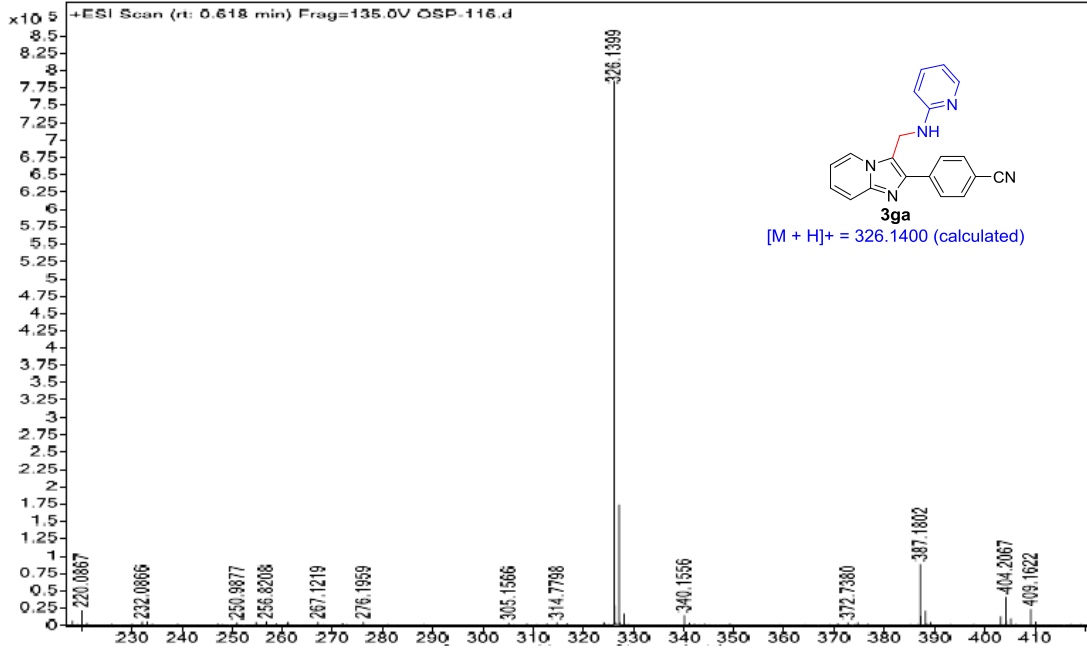

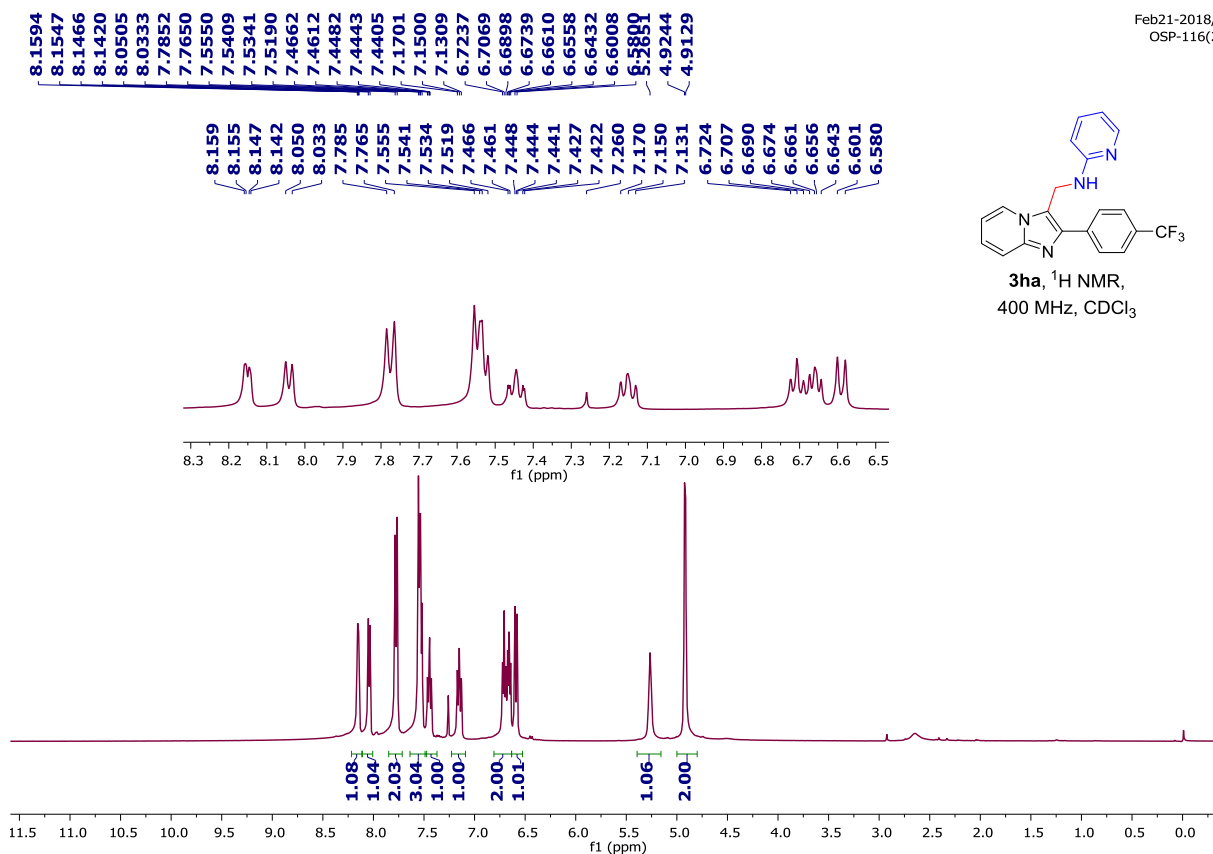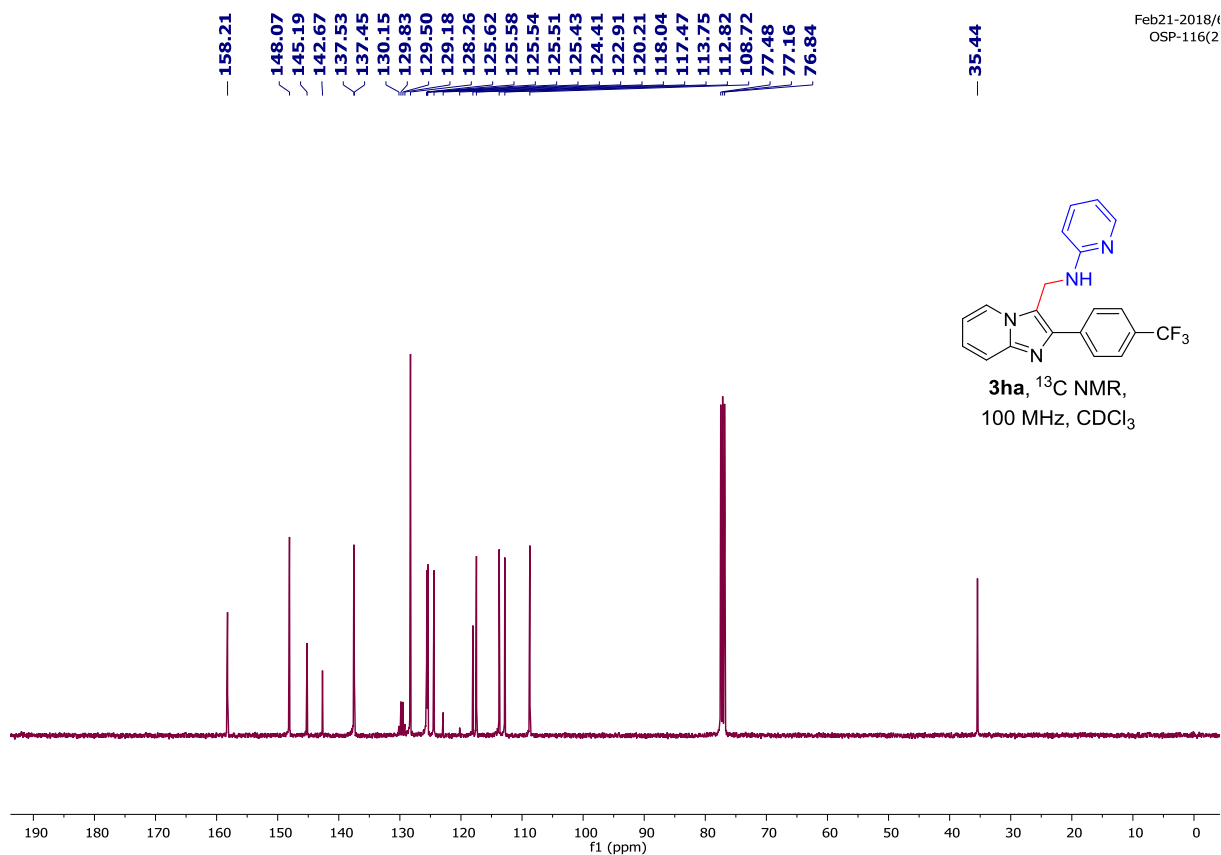

|               |           |             |                      |                 |              |                        |                       |
|---------------|-----------|-------------|----------------------|-----------------|--------------|------------------------|-----------------------|
| Sample Name   | OSP-113   | Position    | P1-E7                | Instrument Name | Instrument 1 | User Name              |                       |
| Inj Vol       | 0.25      | InjPosition |                      | SampleType      | Sample       | IRM Calibration Status | Success               |
| Data Filename | OSP-113.d | ACQ Method  | water_acn_grad_6min_ | Comment         |              | Acquired Time          | 2/12/2018 12:05:01 PM |

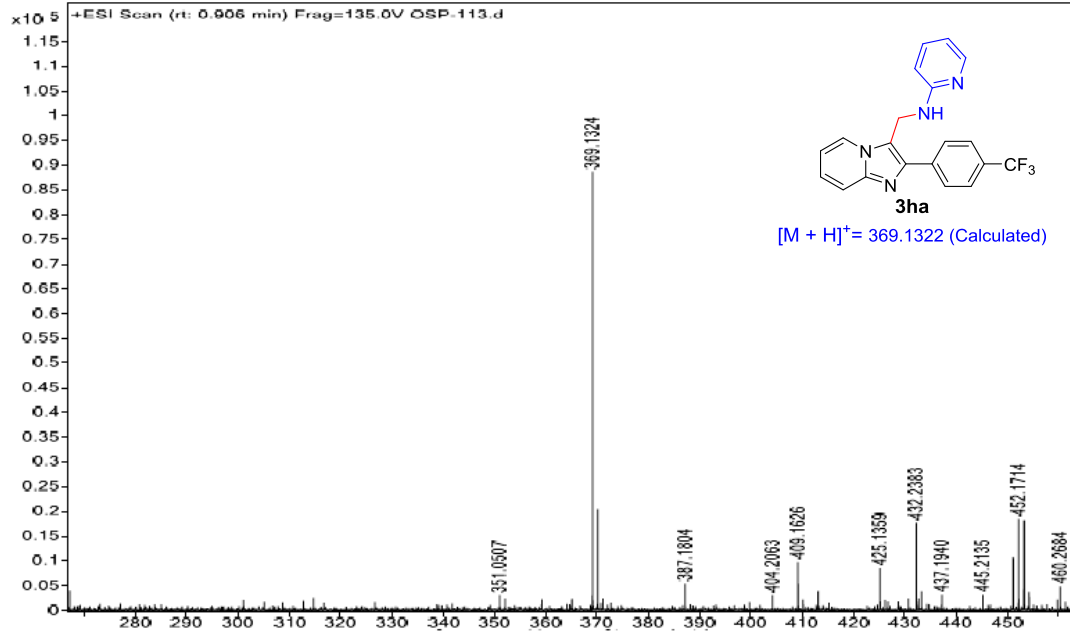

8.6353  
8.6307  
8.6257  
8.1912  
8.1731  
8.1671  
8.1562  
8.1363  
8.1308  
8.0826  
8.0632  
7.6097  
7.5872  
7.5623  
7.5424  
7.5224  
7.4754  
7.4705  
7.4577  
7.4538  
7.4497  
7.4367  
7.4318  
7.2600  
7.2427  
7.2395  
7.2255  
7.2214  
7.2201  
7.2168  
7.2027  
7.2001  
6.8221  
6.8043  
6.7881  
6.6918  
6.6792  
6.6740  
6.6611  
6.5587  
6.5378  
5.0234  
5.0121  
4.9687

8.191  
8.173  
8.167  
8.156  
8.136  
8.131  
8.083  
8.063  
7.610  
7.587  
7.562  
7.542  
7.522  
7.458  
7.454  
7.450  
7.243  
7.240  
7.226  
7.221  
7.220  
7.217  
7.217  
6.805  
6.691  
6.678  
6.675  
6.674  
6.662  
6.661  
6.559  
6.538

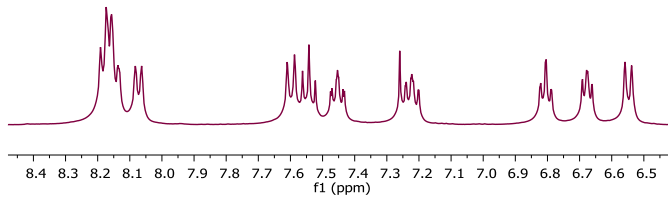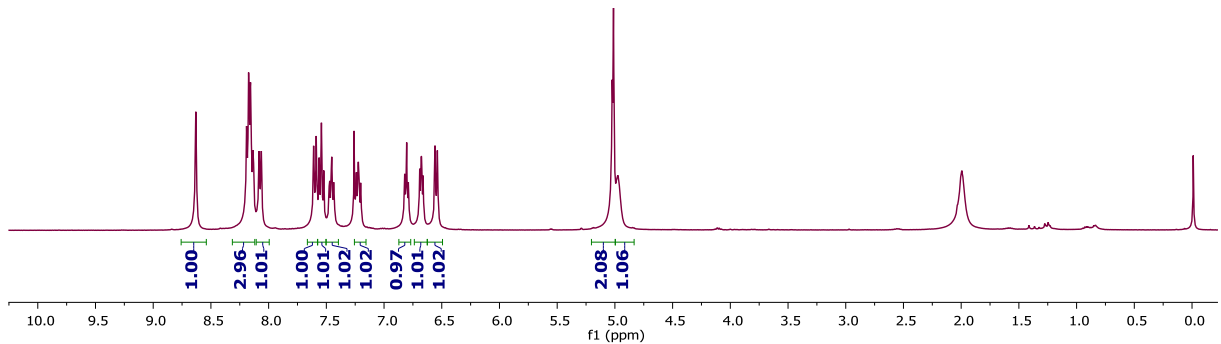



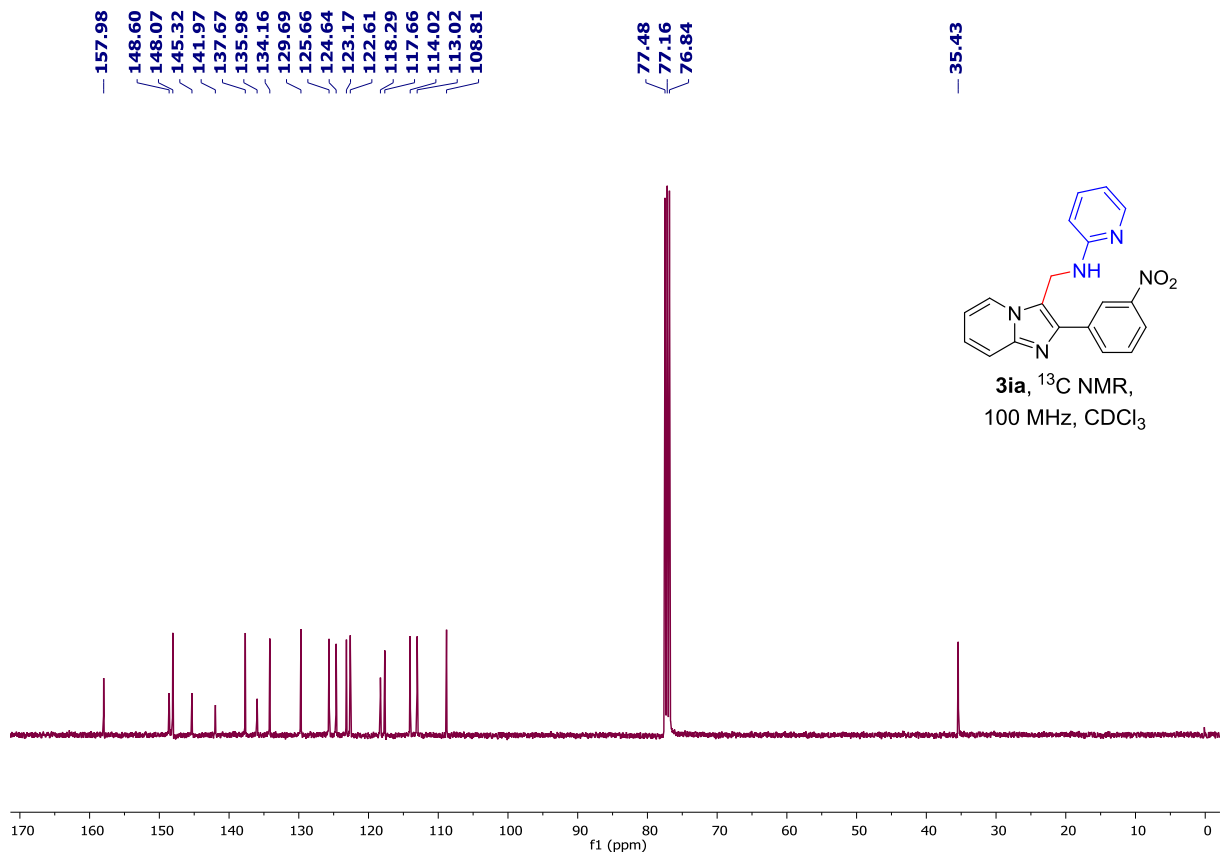

| Sample Name   | OSP-35   | Position    | P2-E5                | Instrument Name | Instrument 1 | User Name              |                      |
|---------------|----------|-------------|----------------------|-----------------|--------------|------------------------|----------------------|
| Inj Vol       | 0.25     | InjPosition |                      | SampleType      | Sample       | IRM Calibration Status | Success              |
| Data Filename | OSP-35.d | ACQ Method  | water_acn_grad_6min_ | Comment         |              | Acquired Time          | 12/8/2017 1:12:08 PM |

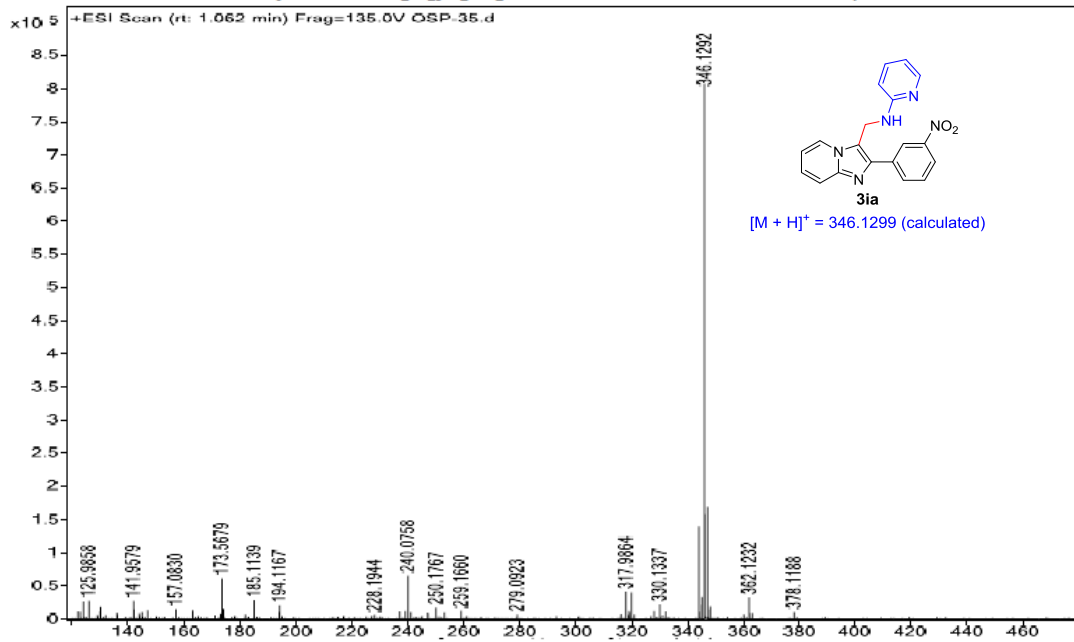

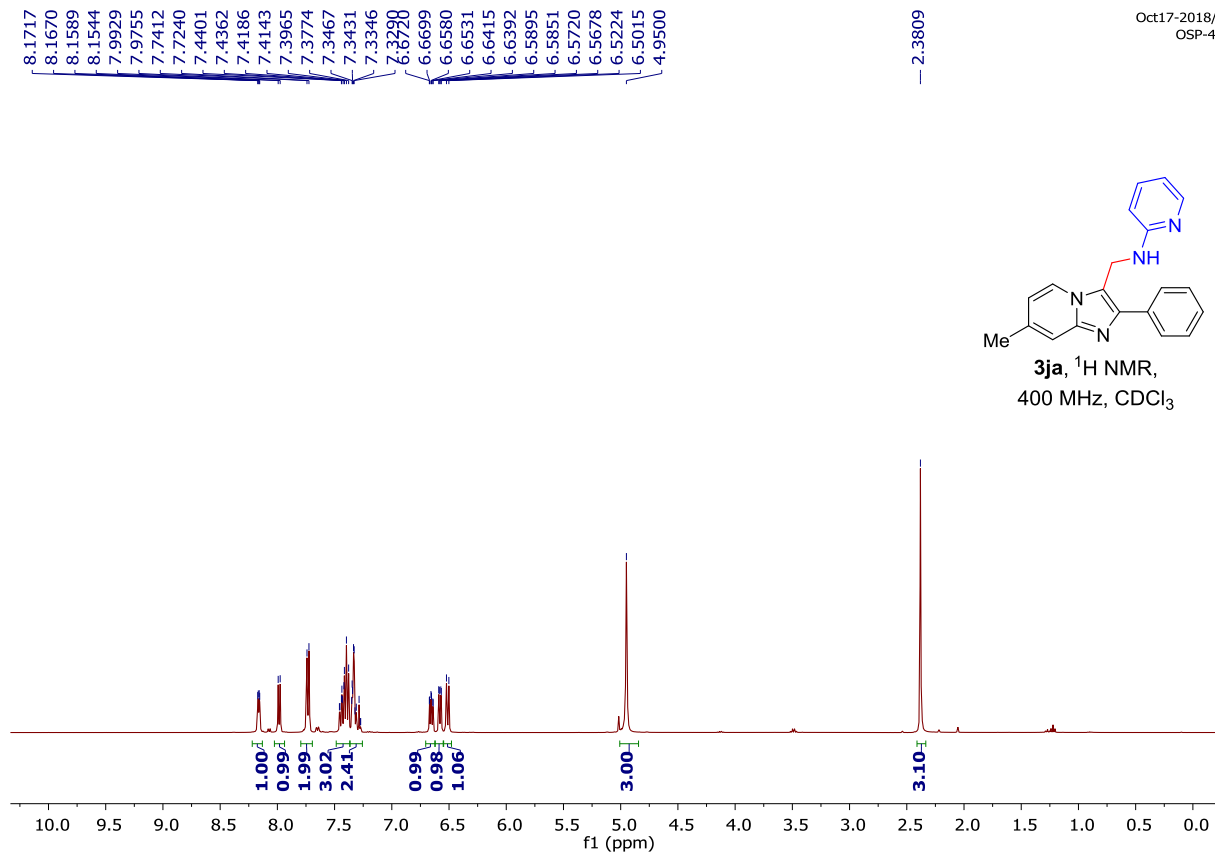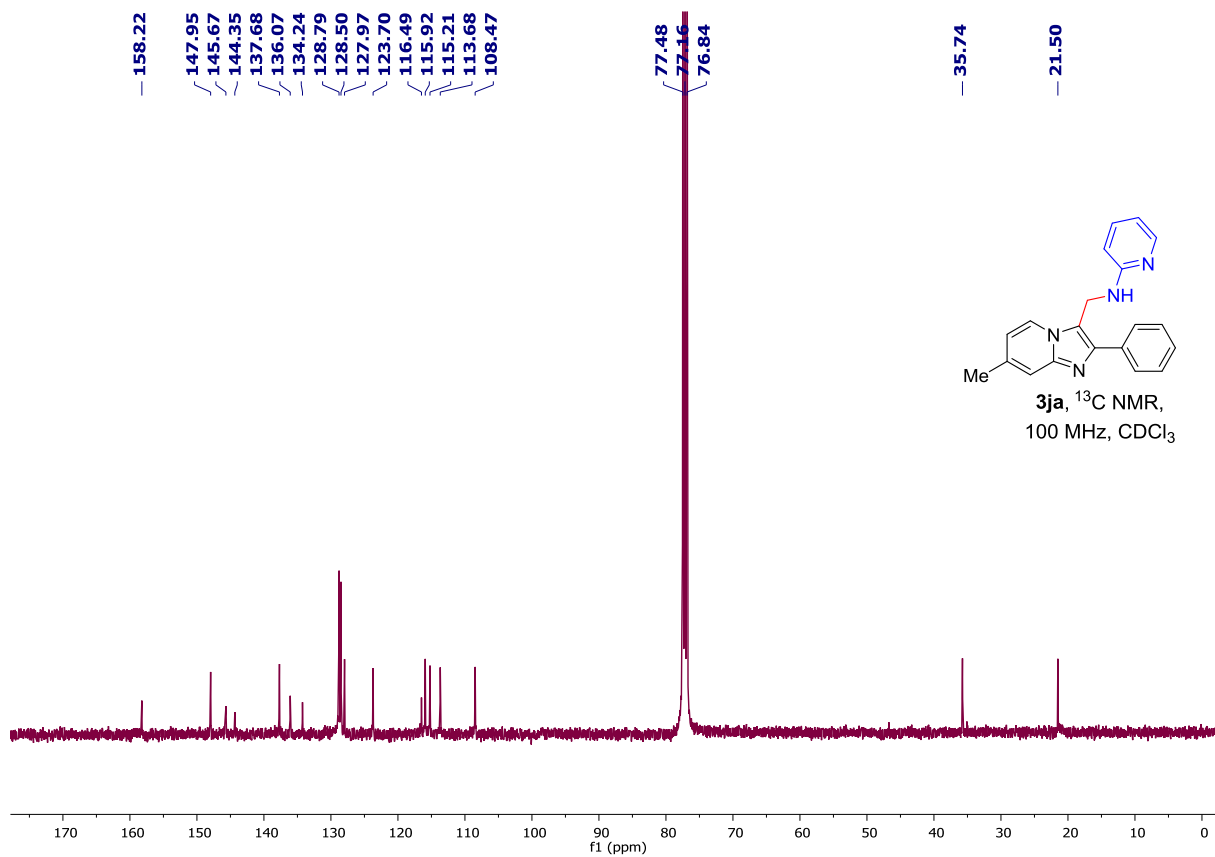

|               |          |             |                      |                 |              |                        |                       |
|---------------|----------|-------------|----------------------|-----------------|--------------|------------------------|-----------------------|
| Sample Name   | OSP-46   | Position    | P2-F5                | Instrument Name | Instrument 1 | User Name              |                       |
| Inj Vol       | 0.2      | InjPosition |                      | SampleType      | Sample       | IRM Calibration Status | Success               |
| Data Filename | OSP-46.d | ACQ Method  | water_acq_grad_6min_ | Comment         |              | Acquired Time          | 10/12/2017 5:58:32 PM |

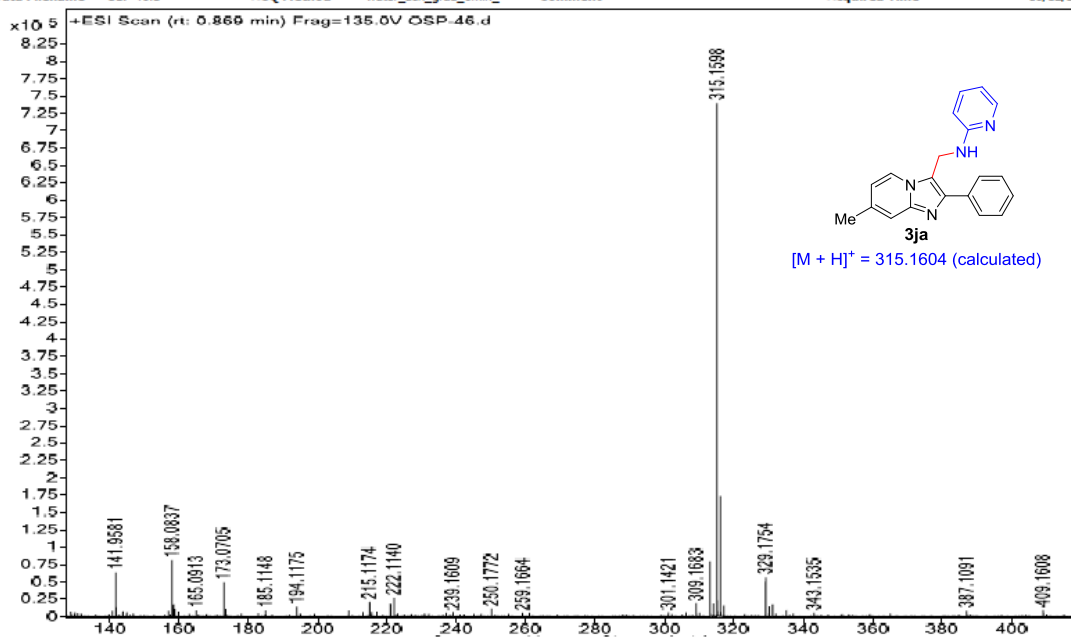

8.1925  
8.1902  
8.1875  
8.1855  
8.1791  
8.1755  
8.1729  
7.9305  
7.7690  
7.7651  
7.7513  
7.7476  
7.7448  
7.5503  
7.5274  
7.4528  
7.4490  
7.4445  
7.4412  
7.4317  
7.4271  
7.4234  
7.4195  
7.4080  
7.4039  
7.3647  
7.3612  
7.3577  
7.3483  
7.3429  
7.3371  
7.3278  
7.3244  
7.3211  
7.2608  
7.0731  
7.0695  
7.0501  
7.0466  
6.6873  
6.6849  
6.6745  
6.6720  
6.6691  
6.6669  
6.6565  
6.6541  
6.4973  
6.4765  
4.9567  
4.9446  
4.6980  
4.6856  
4.6731  
2.2904

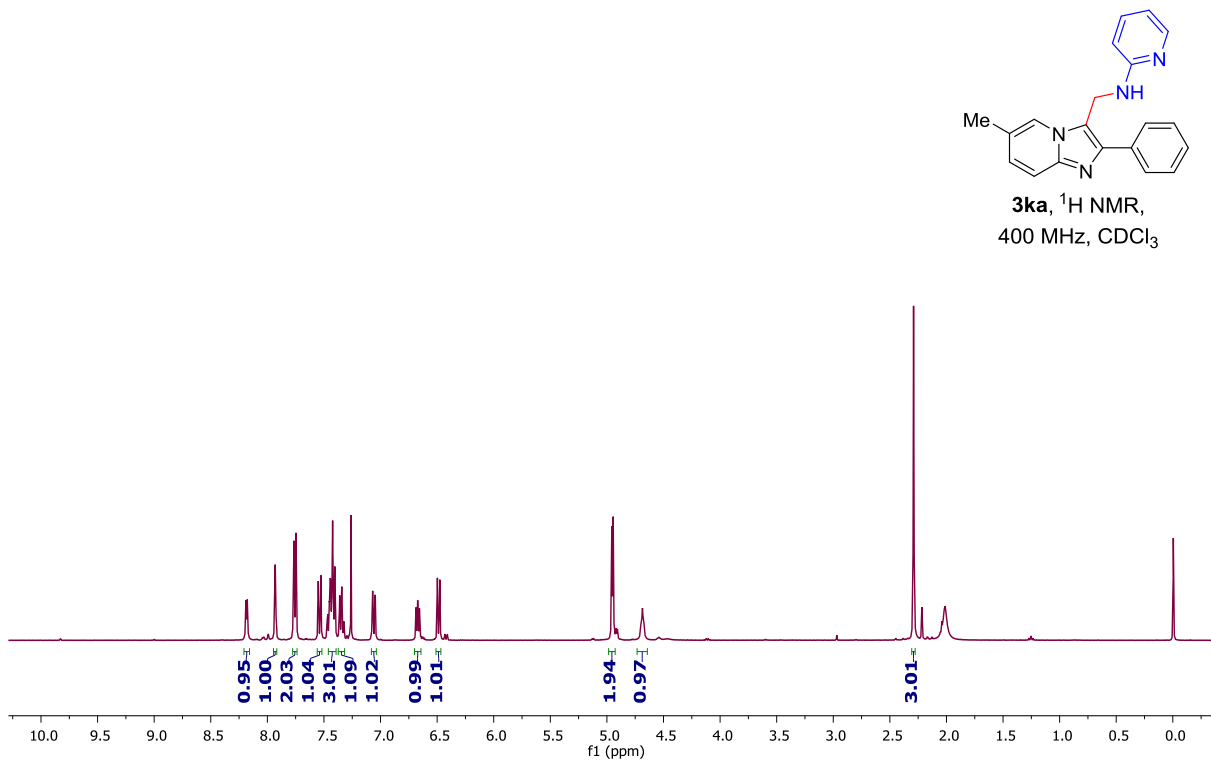

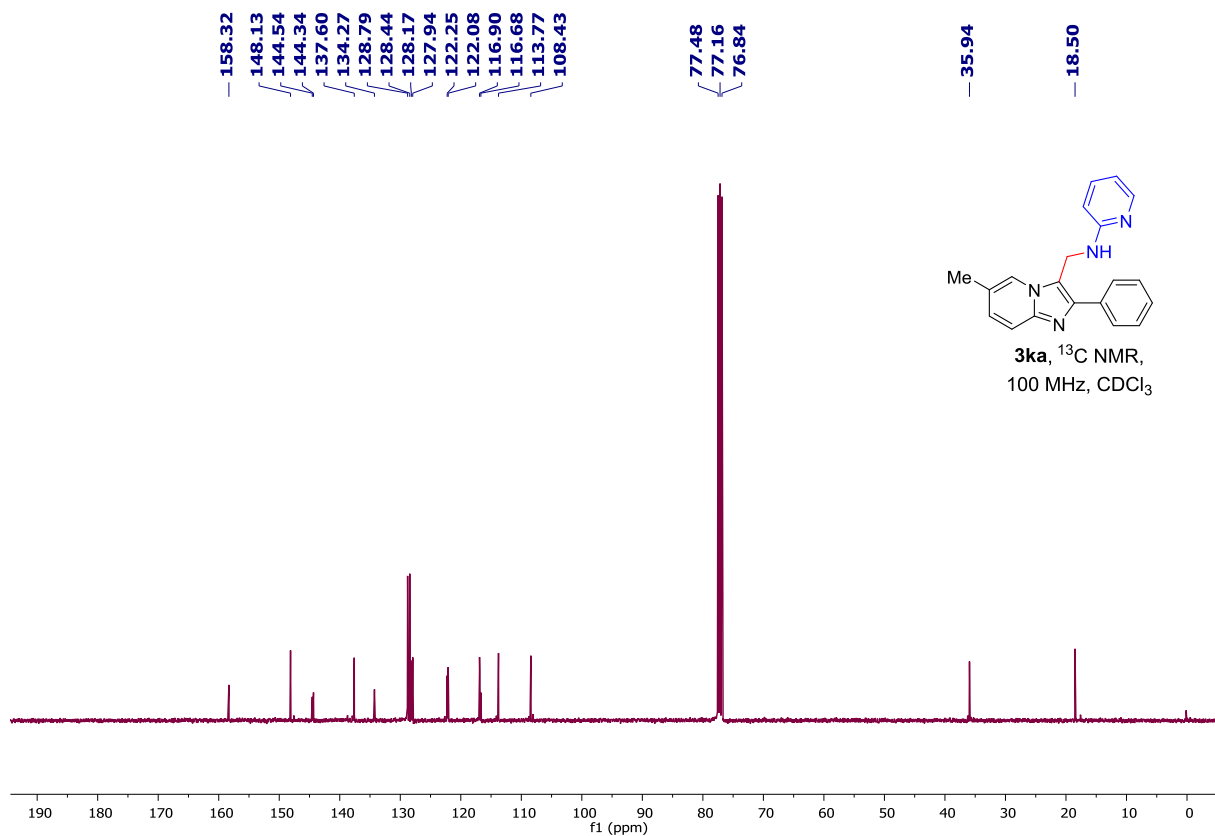

| Sample Name   | OSP-34   | Position    | P2-C9                | Instrument Name | Instrument 1 | User Name              |                     |
|---------------|----------|-------------|----------------------|-----------------|--------------|------------------------|---------------------|
| Inj Vol       | 0.25     | InjPosition |                      | SampleType      | Sample       | IRM Calibration Status | Success             |
| Data Filename | OSP-34.d | ACQ Method  | Methanol_isocratic.m | Comment         |              | Acquired Time          | 2/2/2018 6:14:56 PM |

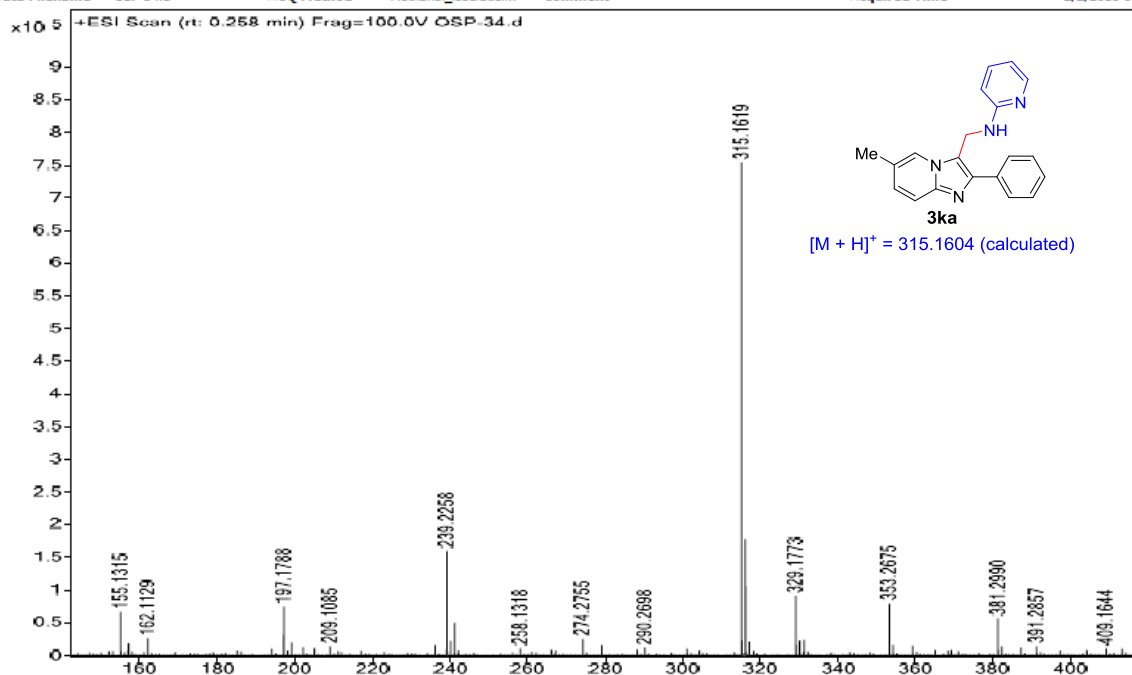

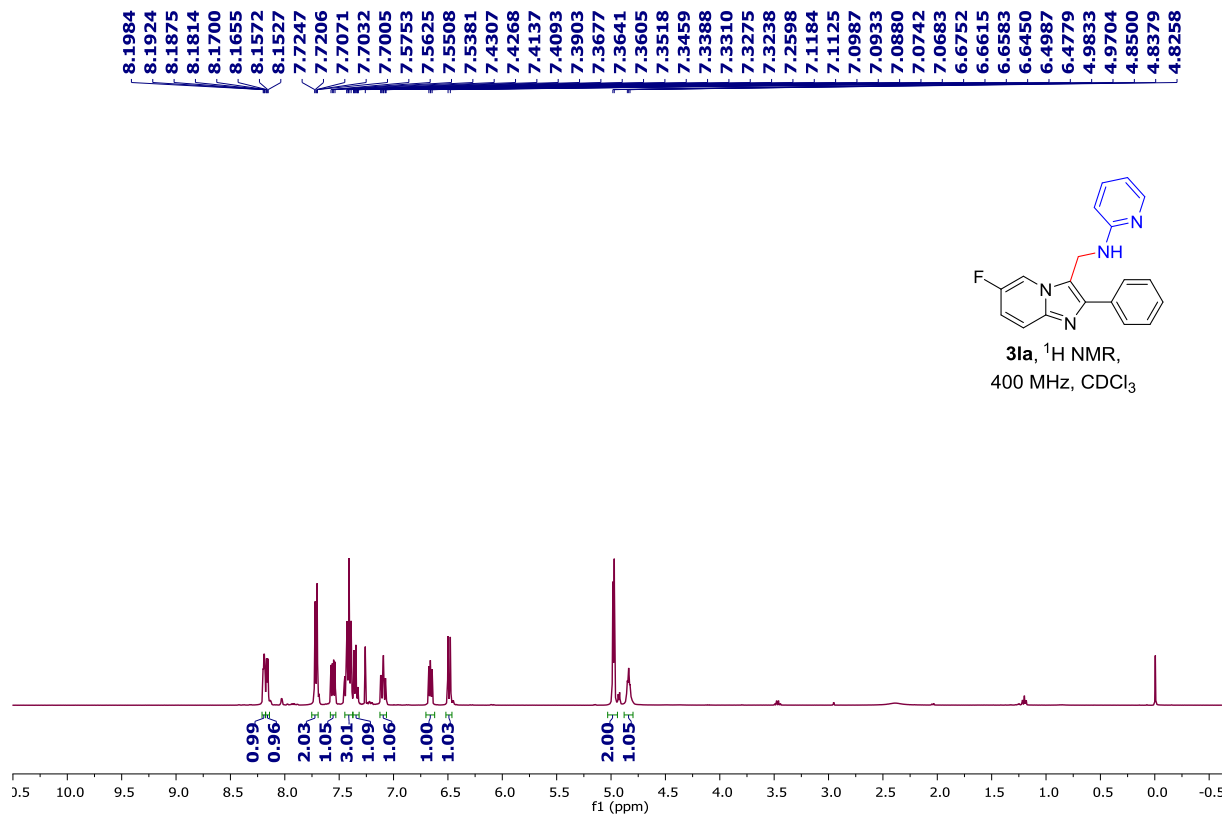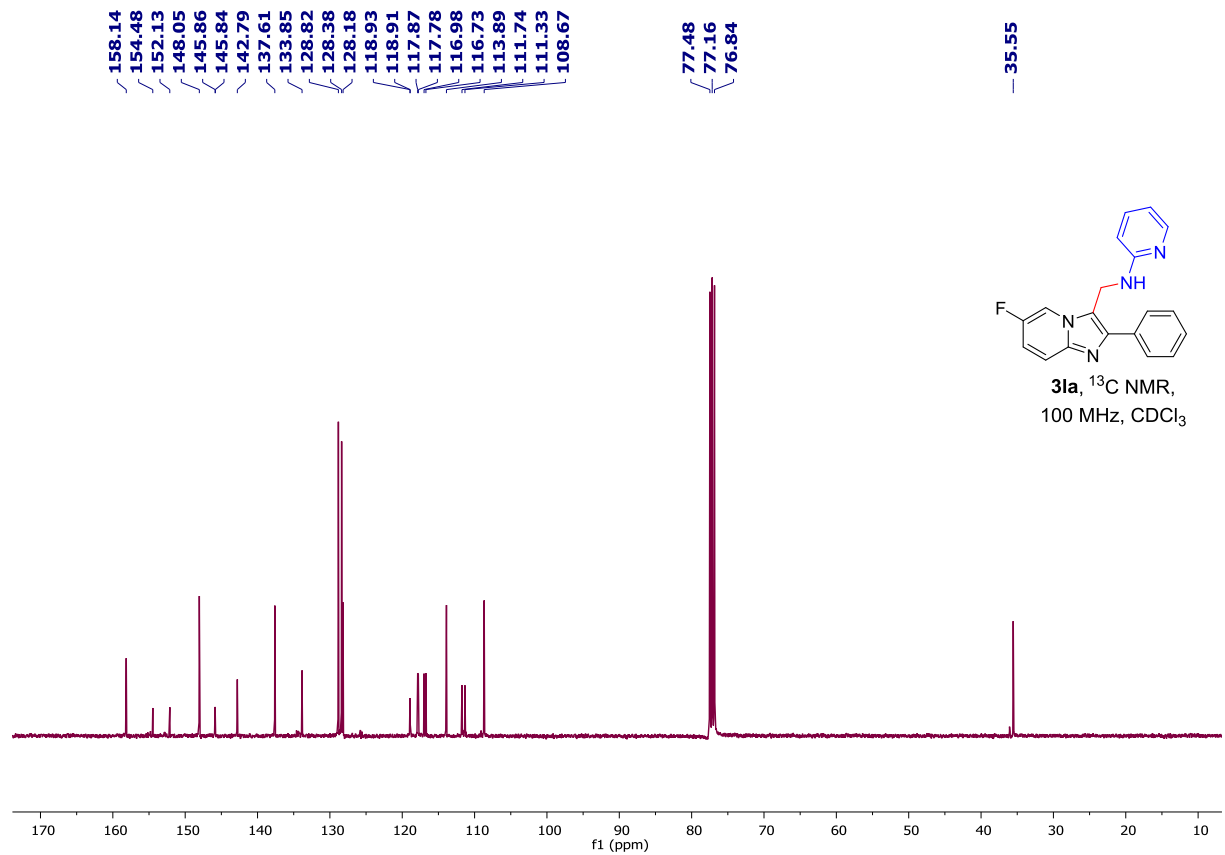

Sample Name OPS-57 Position P2-E6 Instrument Name Instrument 1 User Name  
 Inj Vol 0.25 InjPosition Sample IRM Calibration Status Success  
 Data Filename OPS-57.d ACQ Method water\_acn\_grad\_6min\_ Comment SampleType Sample Acquired Time 12/8/2017 1:26:14 PM

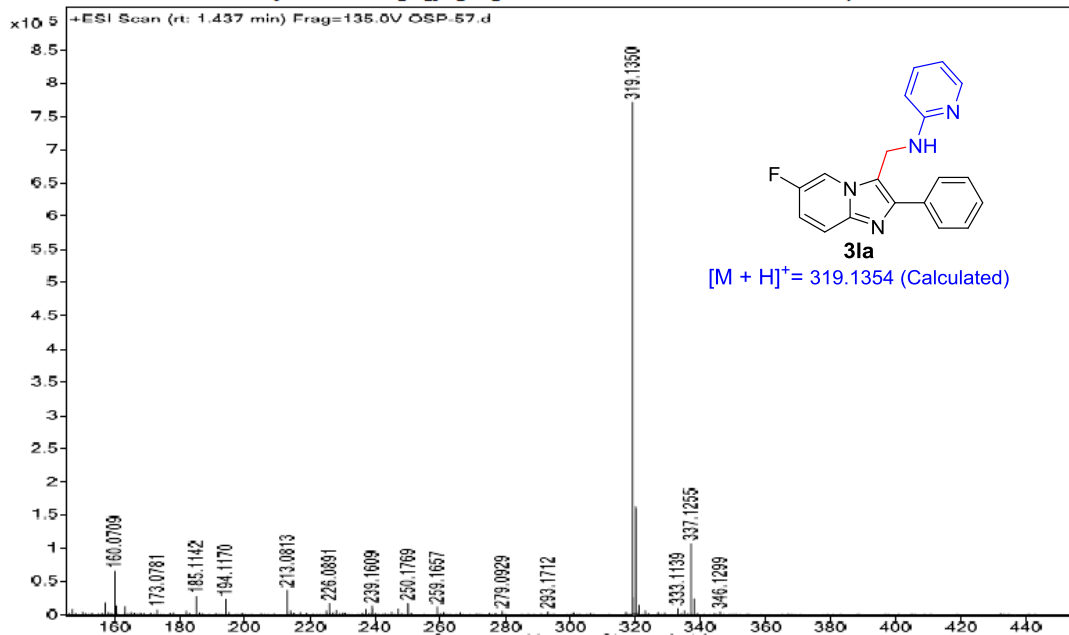

8.4104  
 8.4079  
 8.1941  
 8.1915  
 8.1814  
 8.1789  
 7.6706  
 7.6642  
 7.6592  
 7.6477  
 7.6428  
 7.6364  
 7.4876  
 7.4827  
 7.4733  
 7.4652  
 7.4618  
 7.4491  
 7.4445  
 7.3855  
 7.3791  
 7.3741  
 7.3627  
 7.3578  
 7.3513  
 7.2672  
 7.2613  
 7.2435  
 7.2389  
 6.7093  
 6.7069  
 6.6965  
 6.6941  
 6.6913  
 6.6890  
 6.6787  
 6.6763  
 6.5495  
 6.5285  
 4.9400  
 4.9278  
 4.8942  
 4.8820  
 4.8682  
 1.8368

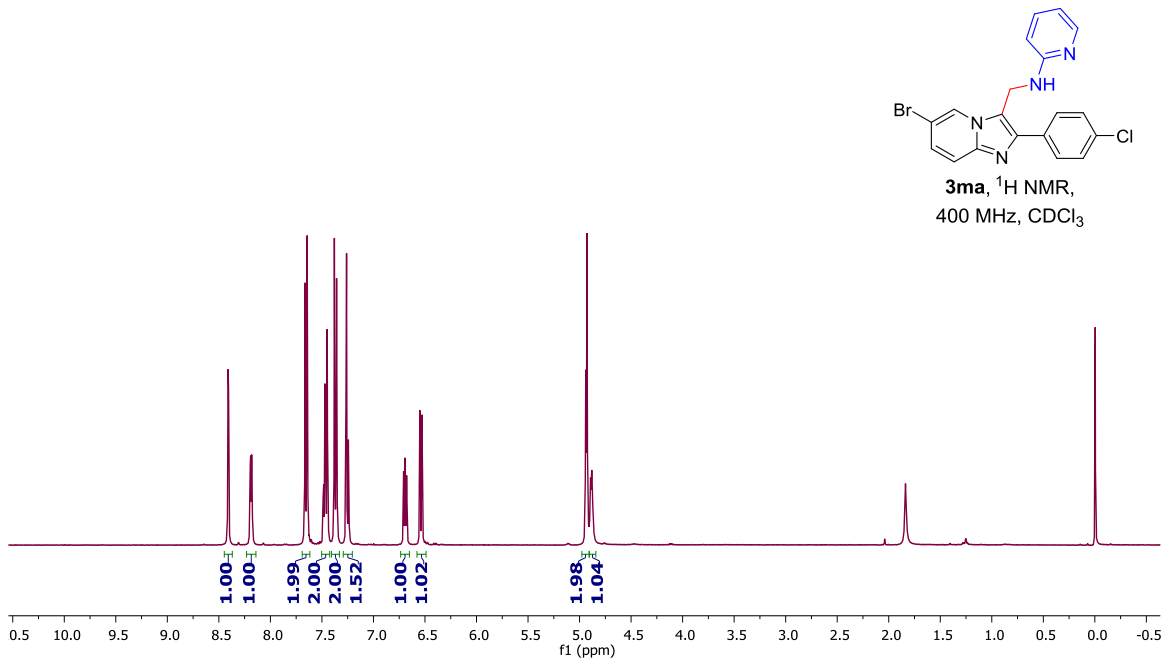

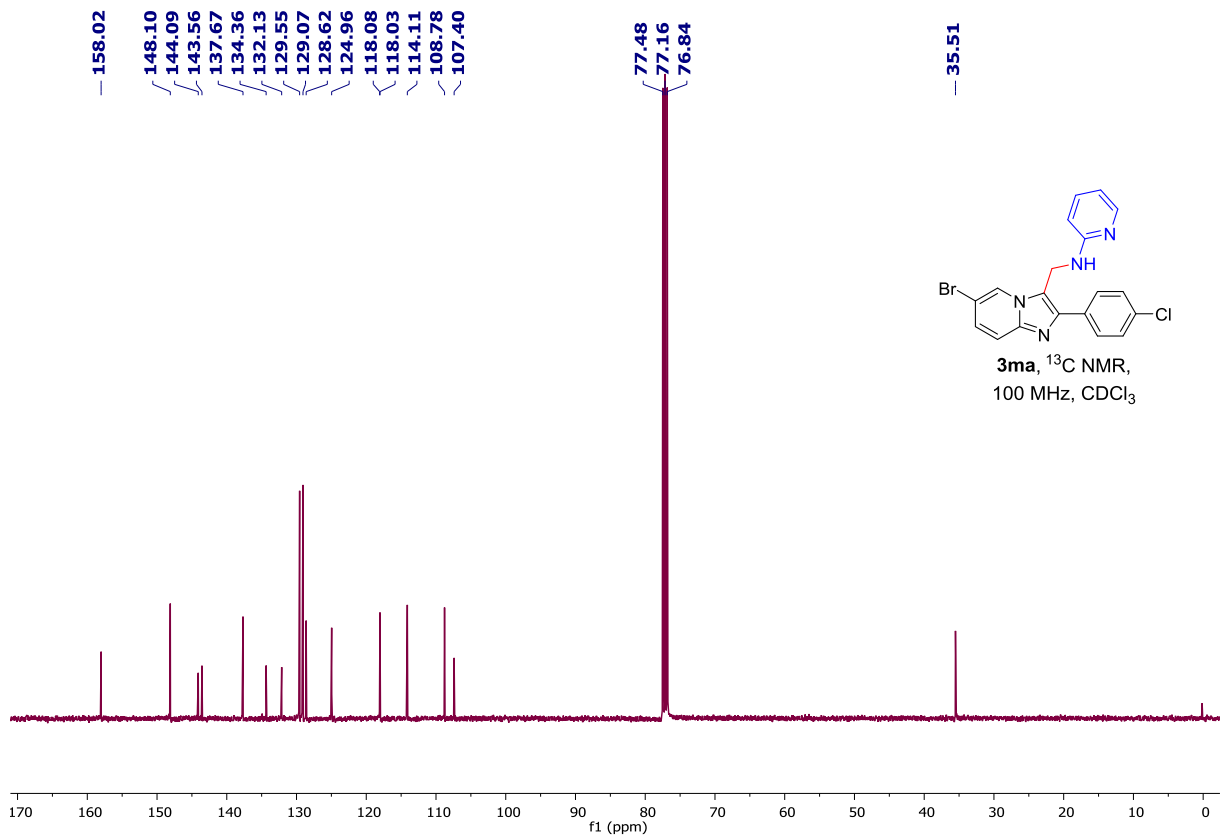

| Sample Name   | OSP-32   | Position    | P1-D3                | Instrument Name | Instrument 1 | User Name              |                       |
|---------------|----------|-------------|----------------------|-----------------|--------------|------------------------|-----------------------|
| Inj Vol       | 0.2      | InjPosition |                      | SampleType      | Sample       | IRM Calibration Status | Success               |
| Data Filename | OSP-32.d | ACQ Method  | water_acn_grad_6min_ | Comment         |              | Acquired Time          | 9/22/2017 10:21:39 PM |

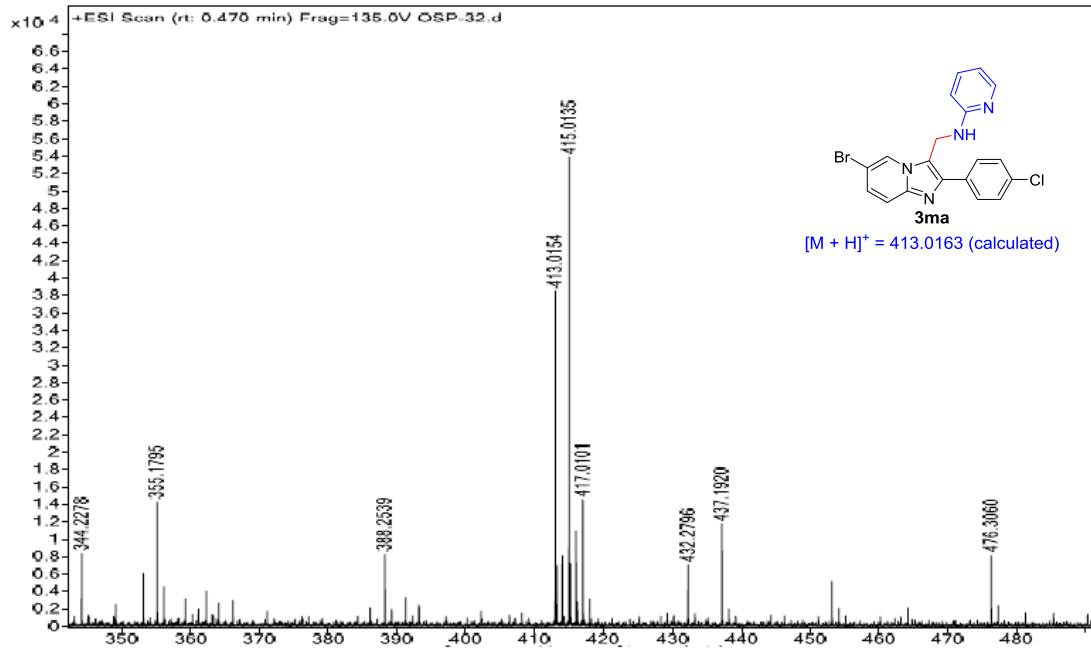

Oct17-2018/8  
OSP-73

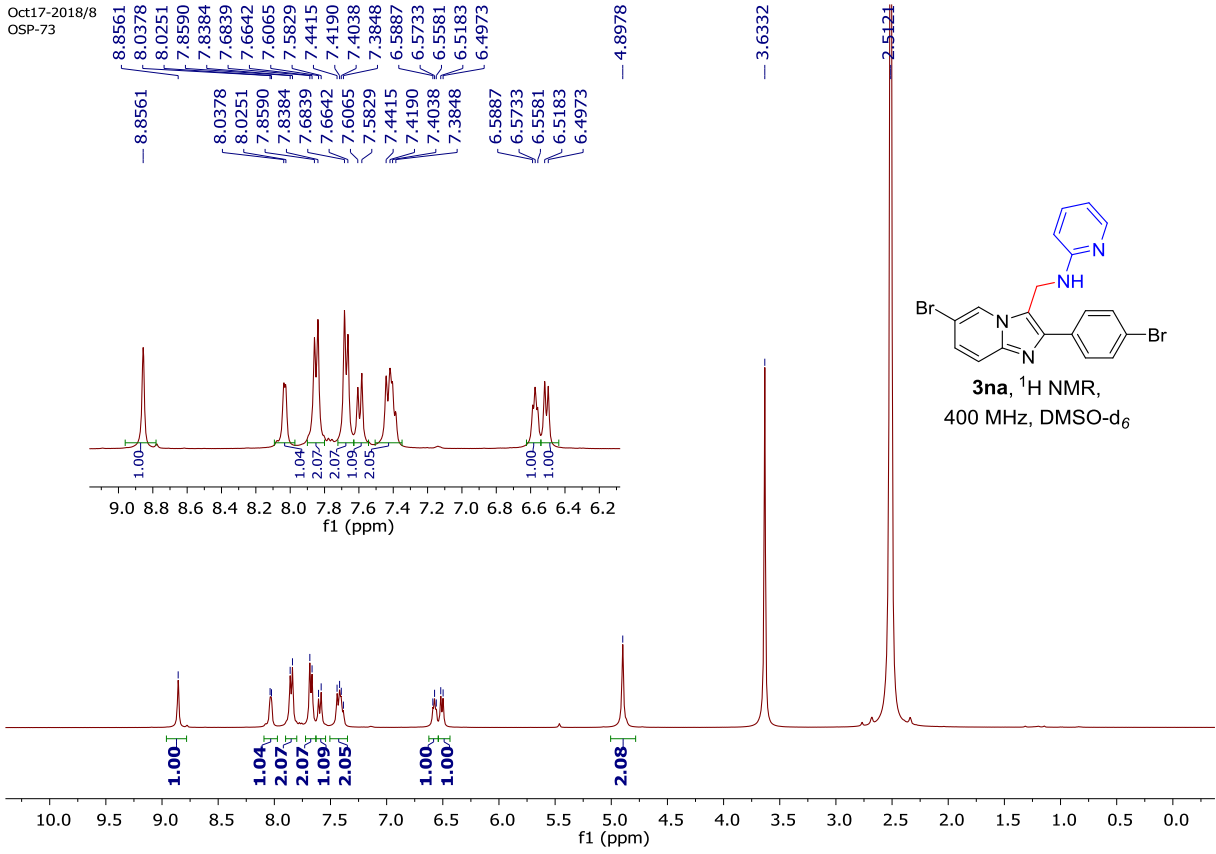

OSP-73

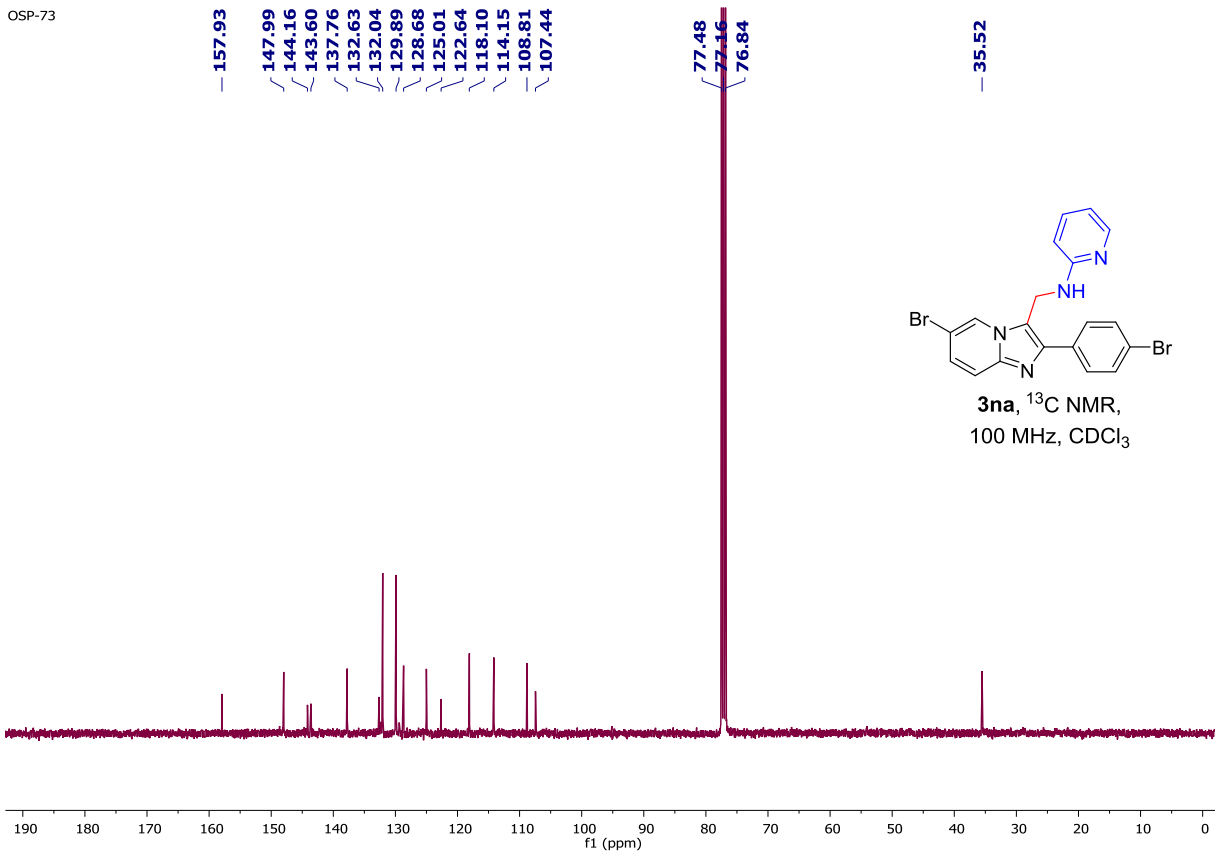



|               |          |             |                      |                 |              |                        |                      |
|---------------|----------|-------------|----------------------|-----------------|--------------|------------------------|----------------------|
| Sample Name   | OSP-73   | Position    | P2-D7                | Instrument Name | Instrument 1 | User Name              |                      |
| Inj Vol       | 0.25     | InjPosition |                      | SampleType      | Sample       | IRM Calibration Status | Success              |
| Data Filename | OSP-73.d | ACQ Method  | water_acn_grad_6min_ | Comment         |              | Acquired Time          | 1/17/2018 5:19:39 PM |

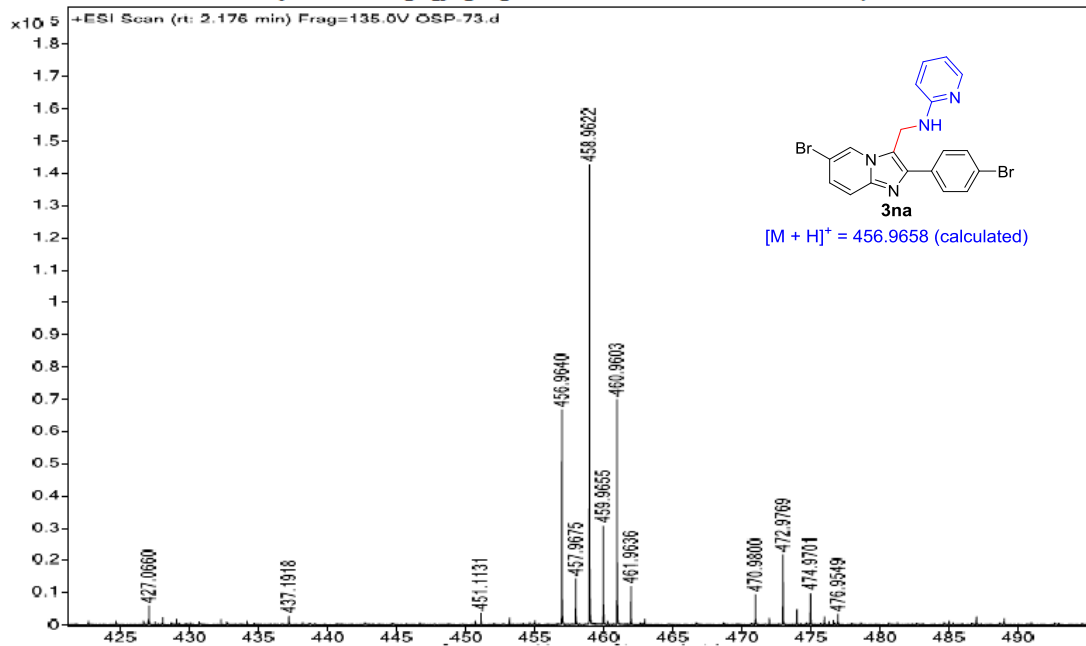

8.1939  
8.1915  
8.1857  
8.1836  
8.1807  
8.1778  
8.1618  
8.1570  
8.1546  
8.1446  
8.1397  
7.9859  
7.9685  
7.8729  
7.8680  
7.8553  
7.8506  
7.3368  
7.3337  
7.3304  
7.2781  
6.7128  
6.7022  
6.6998  
6.6970  
6.6947  
6.6844  
6.6820  
6.6255  
6.6211  
6.6086  
6.6041  
6.5877  
5.0766  
5.0651  
5.0536  
4.9511  
4.9390

— 2.3970

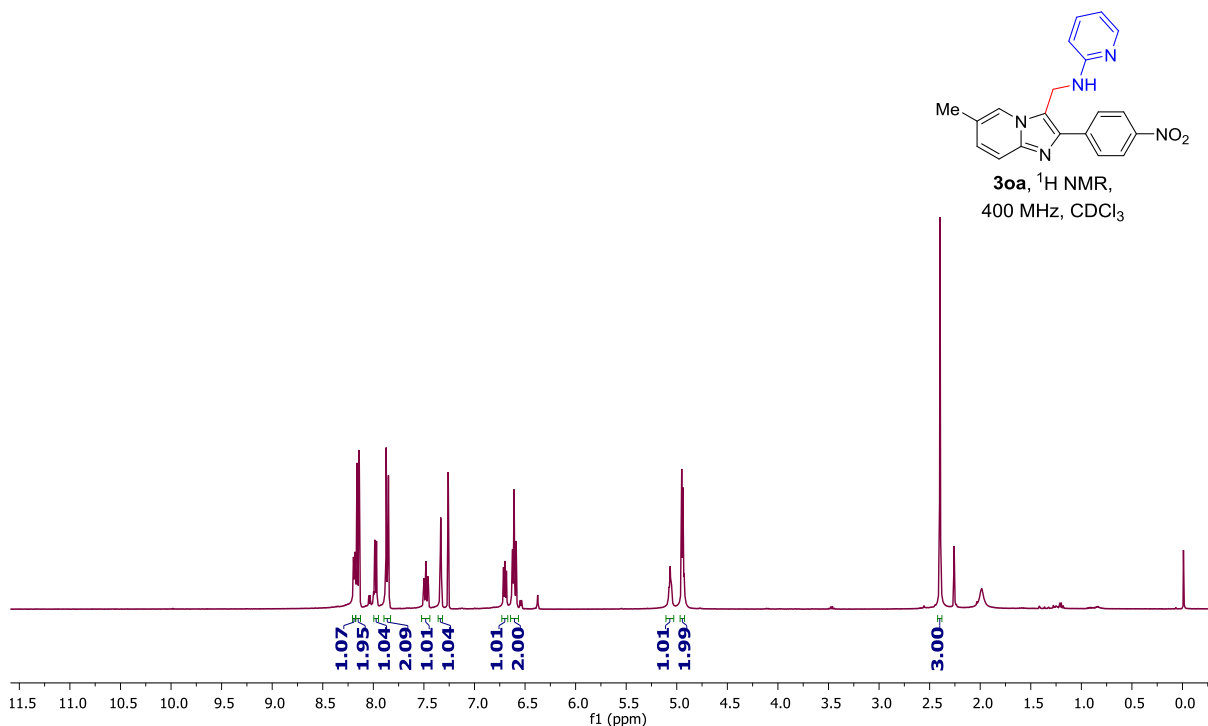

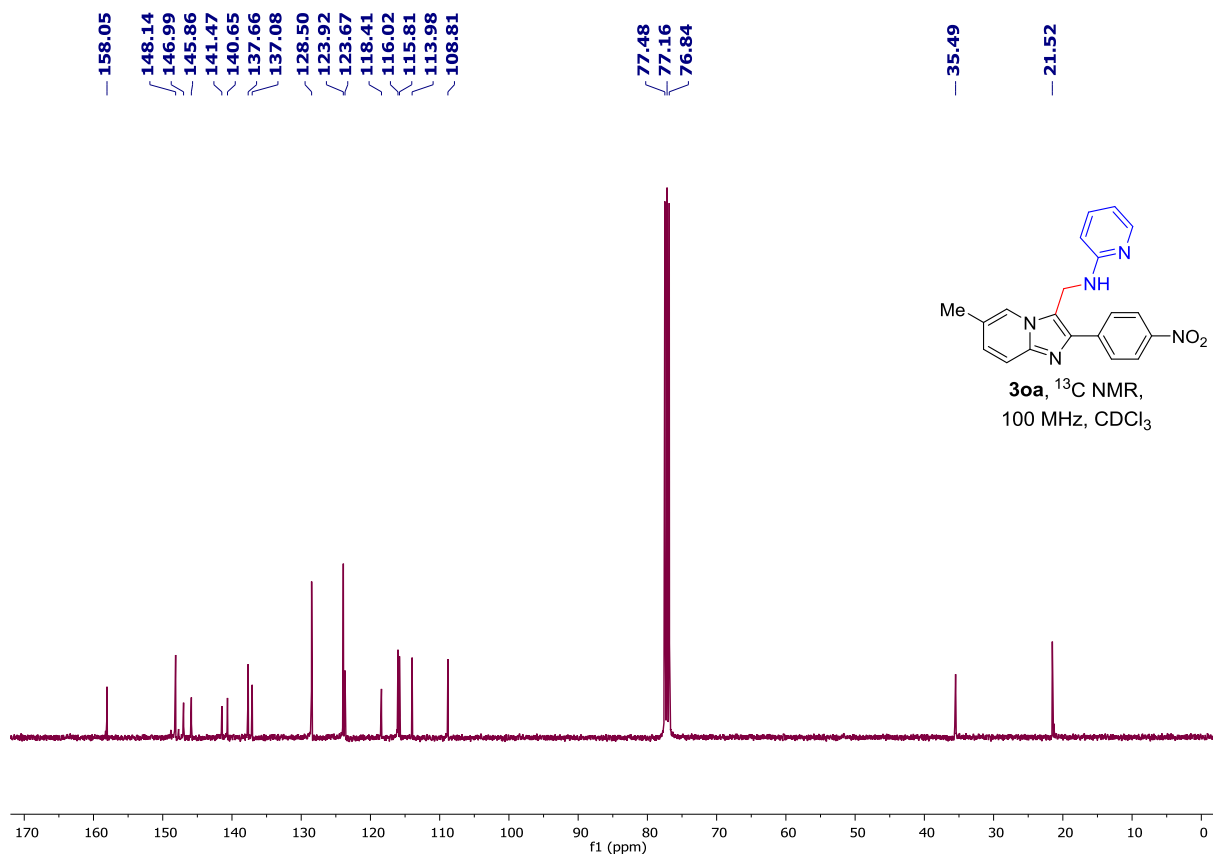

| Sample Name   | OSP-71   | Position    | P2-D4                | Instrument Name | Instrument 1 | User Name              | IRM Calibration Status | Success              |
|---------------|----------|-------------|----------------------|-----------------|--------------|------------------------|------------------------|----------------------|
| Inj Vol       | 0.25     | InjPosition |                      | SampleType      | Sample       | IRM Calibration Status |                        |                      |
| Data Filename | OSP-71.d | ACQ Method  | water_acq_grad_6min_ | Comment         |              | Acquired Time          |                        | 1/17/2018 4:37:15 PM |

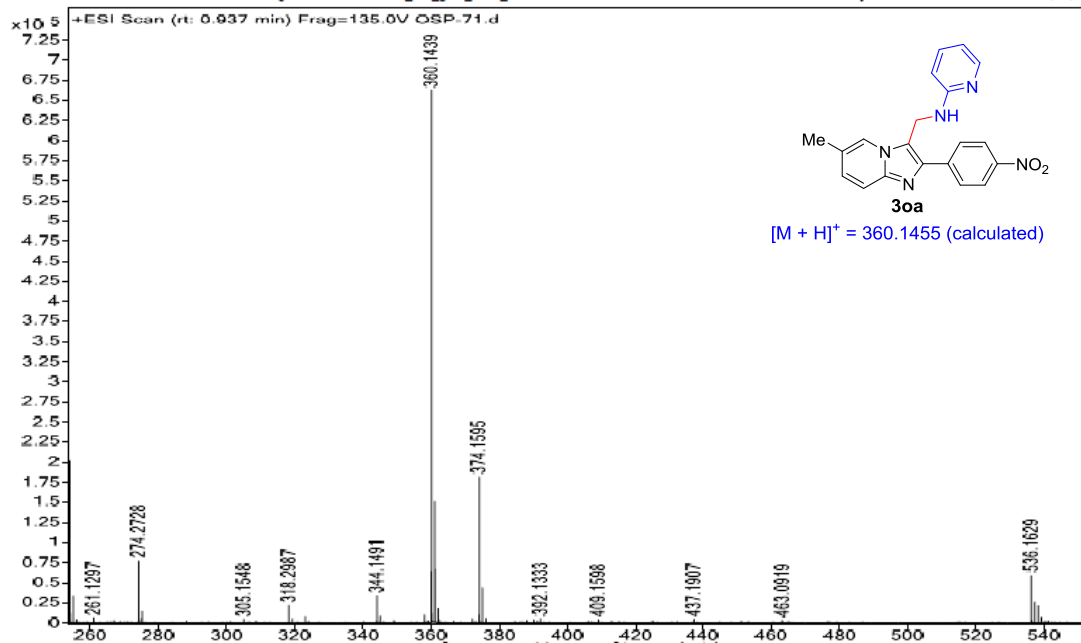

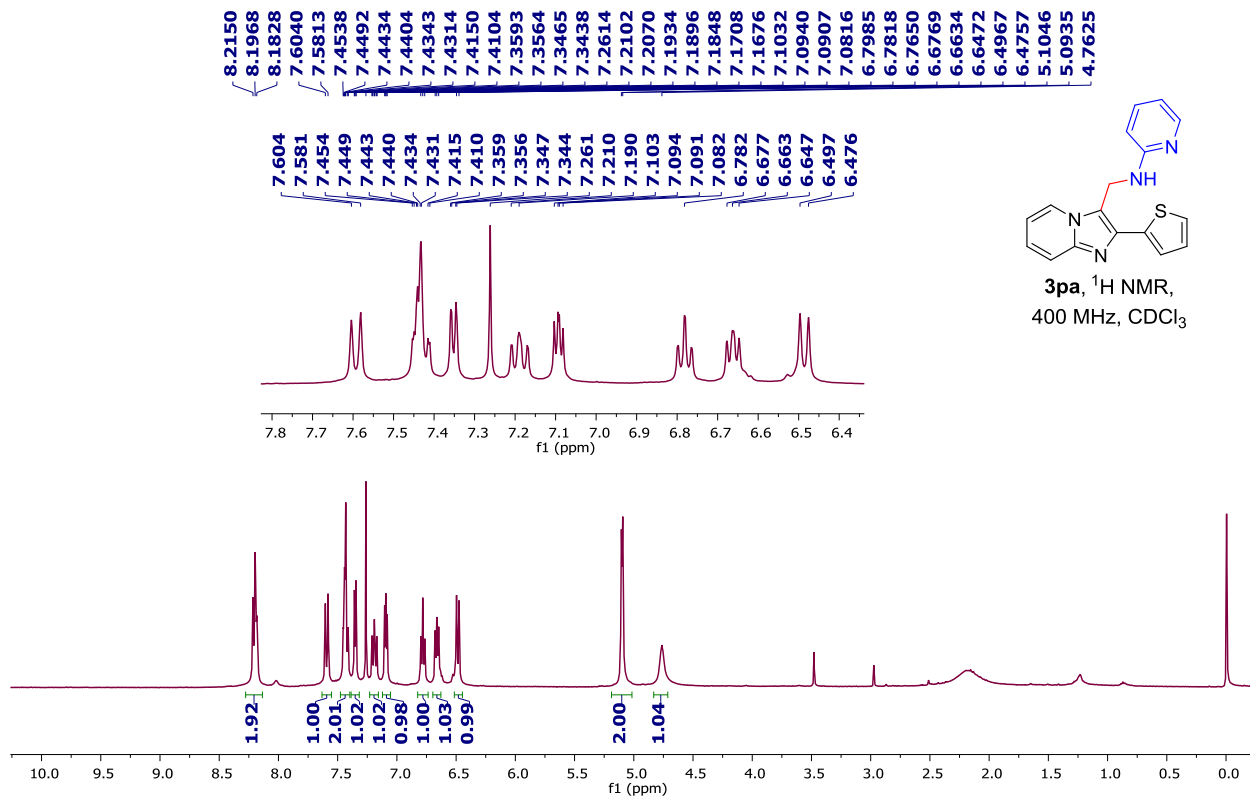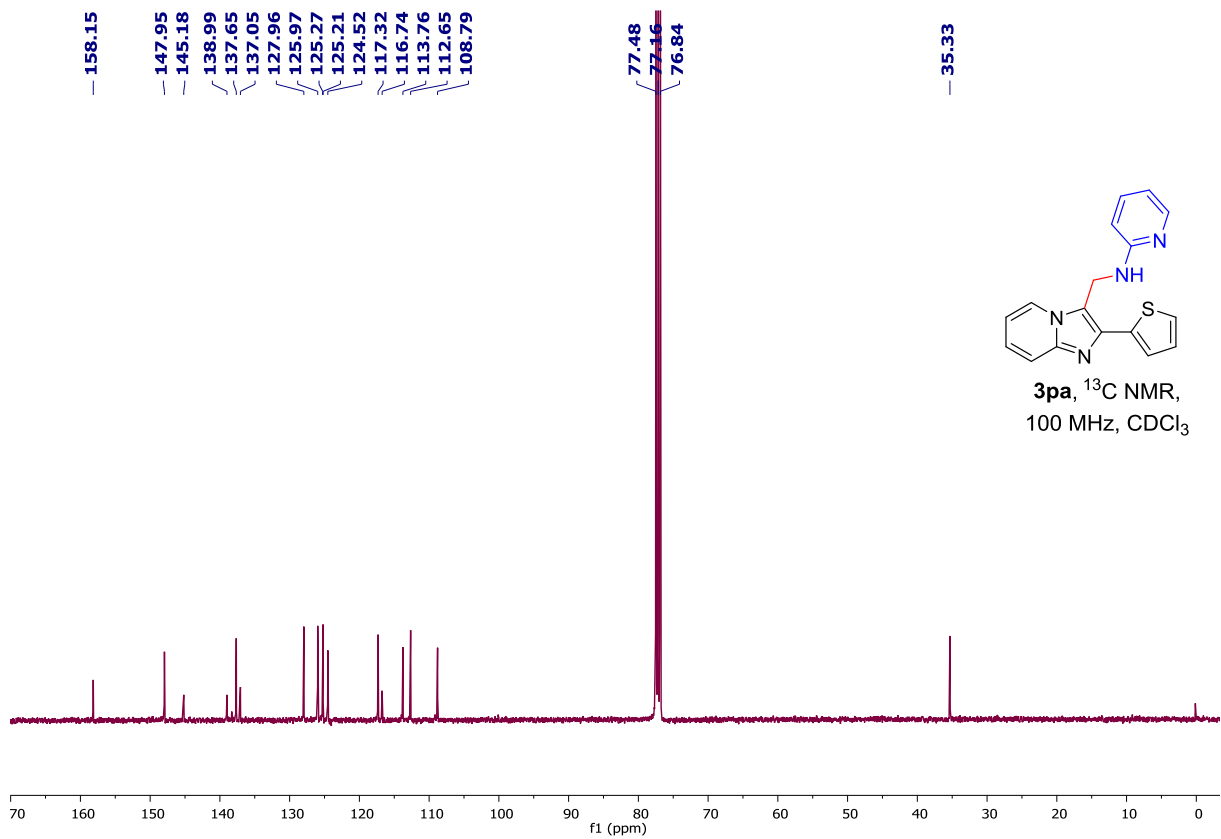

|               |          |             |                      |                 |              |                        |                       |
|---------------|----------|-------------|----------------------|-----------------|--------------|------------------------|-----------------------|
| Sample Name   | OSP-49   | Position    | P2-F7                | Instrument Name | Instrument 1 | User Name              |                       |
| Inj Vol       | 0.2      | InjPosition |                      | SampleType      | Sample       | IRM Calibration Status | Success               |
| Data Filename | OSP-49.d | ACQ Method  | water_acn_grad_6min_ | Comment         |              | Acquired Time          | 10/12/2017 6:26:48 PM |

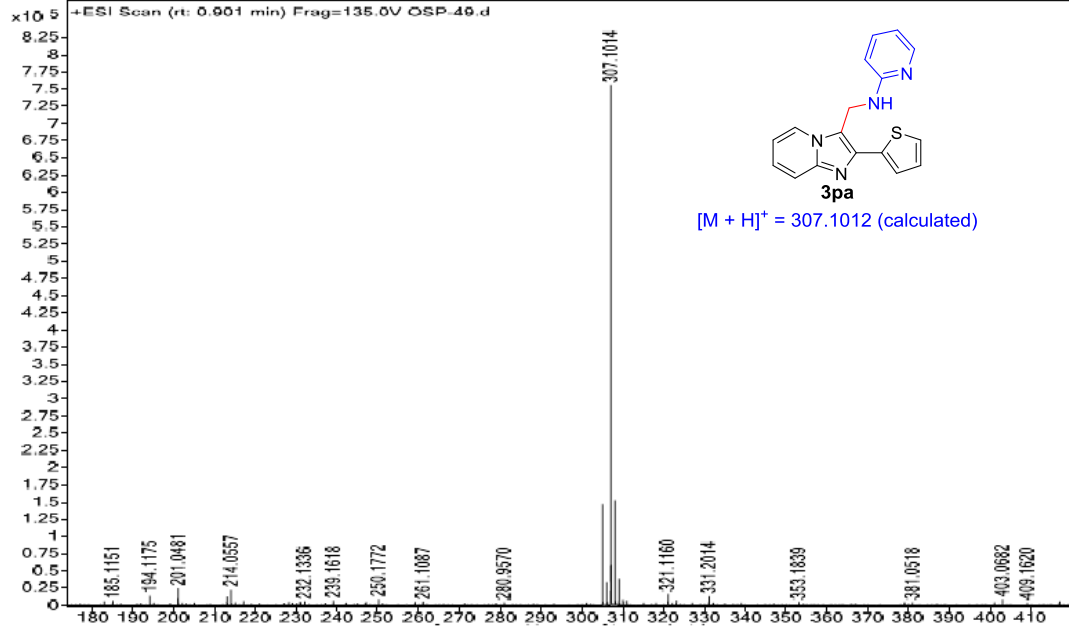

OSP-97 (17 Feb 2018)/5 (27 Jan 2018) — OSP-5

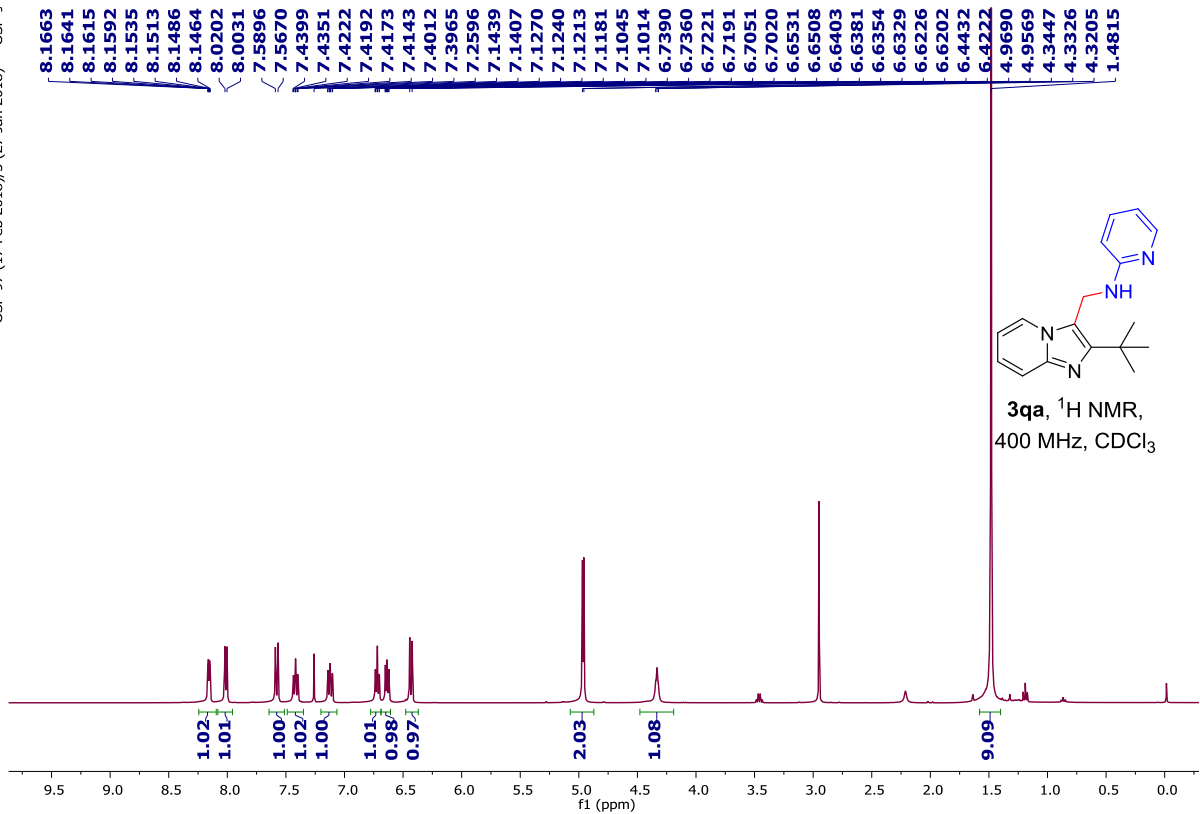

Feb19-2018/2  
OSP-97

158.19  
153.77  
148.13  
143.70  
137.47

123.98  
123.68  
117.20  
115.45  
113.58  
112.08  
108.43

77.48  
77.16  
76.84

36.04  
33.49  
31.28

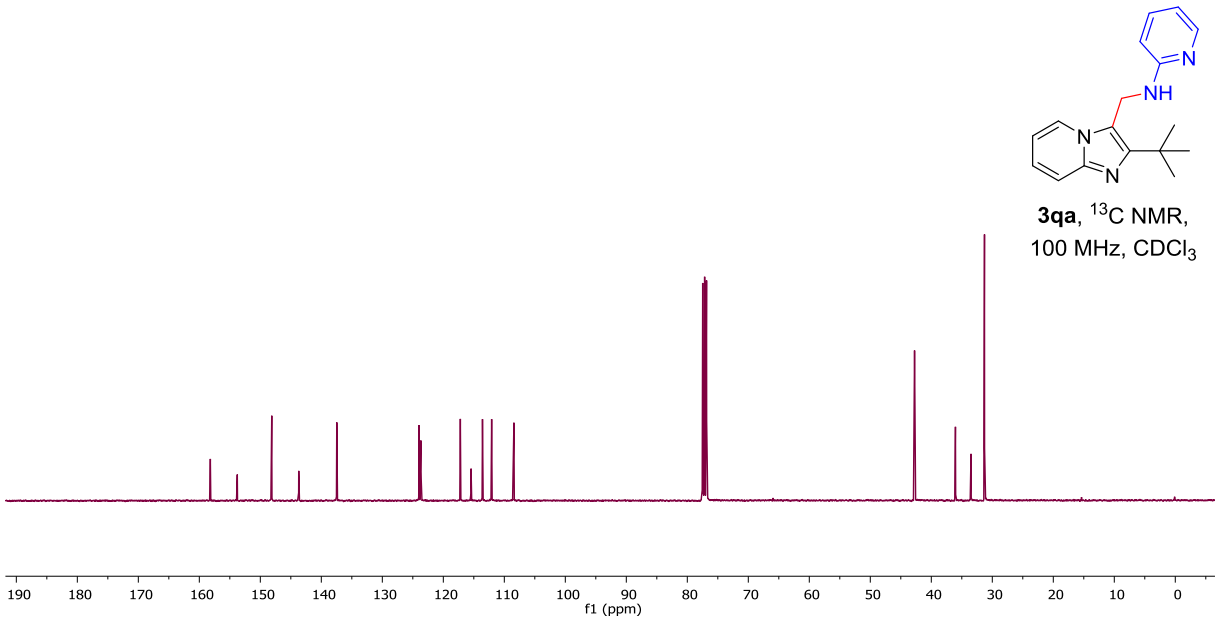

| Sample Name   | OSP-97   | Position    | P1-B8                | Instrument Name | Instrument 1 | User Name              |                      |
|---------------|----------|-------------|----------------------|-----------------|--------------|------------------------|----------------------|
| Inj Vol       | 0.25     | InjPosition |                      | SampleType      | Sample       | IRM Calibration Status | Success              |
| Data Filename | OSP-97.d | ACQ Method  | water_acn_grad_6min_ | Comment         |              | Acquired Time          | 1/24/2018 5:23:07 PM |

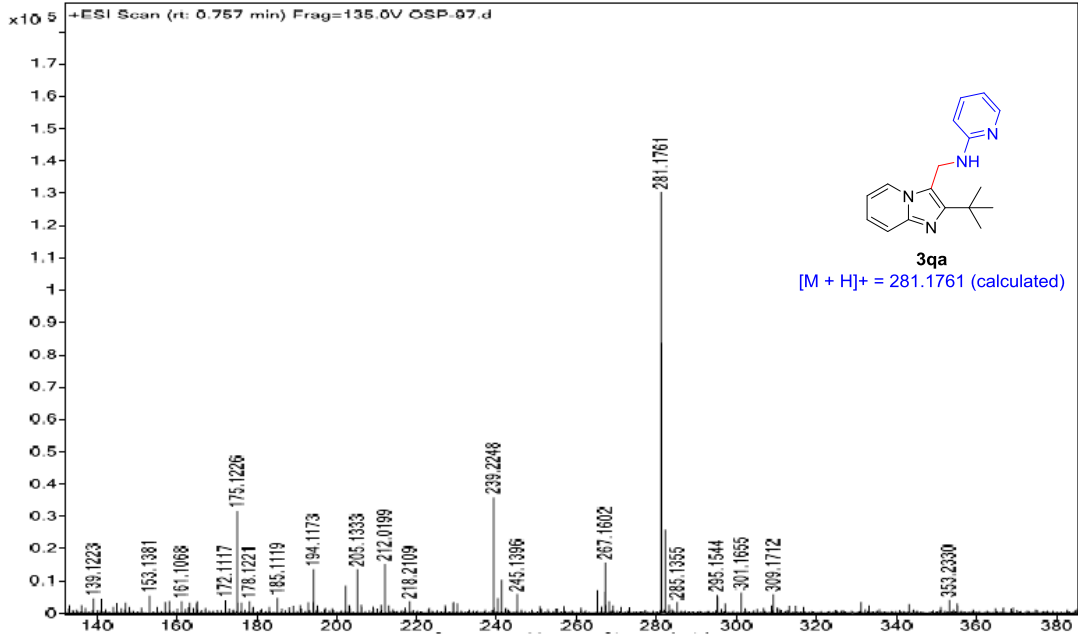

8.3471  
8.3441  
8.1539  
8.1517  
8.1491  
8.1469  
8.1413  
8.1389  
8.1363  
8.1341  
7.5458  
7.5024  
7.5002  
7.4786  
7.4763  
7.4390  
7.4343  
7.4211  
7.4175  
7.4134  
7.4003  
7.3955  
7.2598  
7.1181  
7.1131  
7.0942  
7.0893  
6.6574  
6.6550  
6.6446  
6.6422  
6.6392  
6.6369  
6.6267  
6.6243  
6.4789  
6.4763  
6.4736  
6.4580  
6.4556  
6.4530  
4.9259  
4.9114  
4.8972  
4.8527  
4.8405

Oct17-2018/!  
OSP-12:

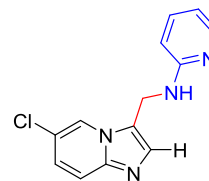

**3sa**,  $^1\text{H}$  NMR,  
400 MHz,  $\text{CDCl}_3+\text{DMSO}-d_6$

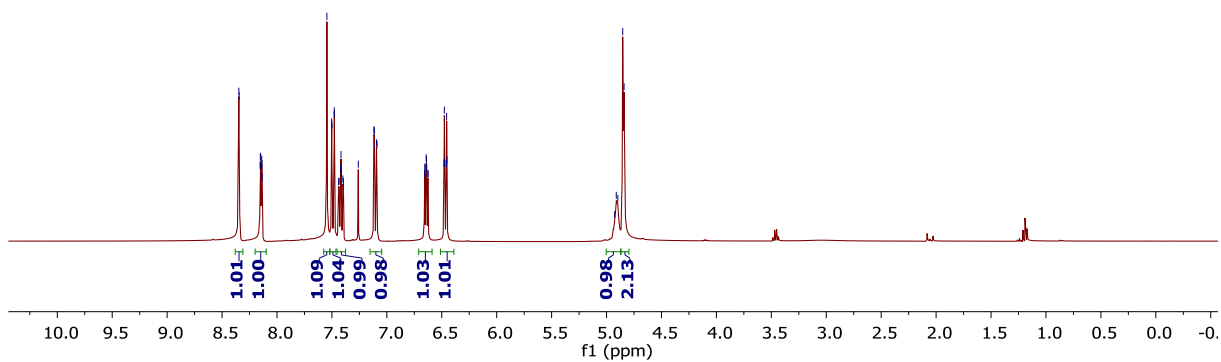

Mar23-2018/12  
OSP-122

157.69  
146.97  
143.49  
136.47  
133.07  
124.68  
122.83  
122.45  
119.50  
117.23  
112.43  
108.18  
77.29  
76.97  
76.65  
40.13  
39.92  
39.71  
39.50  
39.29  
39.08  
38.87  
34.22

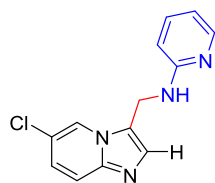

**3sa**,  $^{13}\text{C}$  NMR,  
100 MHz,  $\text{CDCl}_3+\text{DMSO}-d_6$

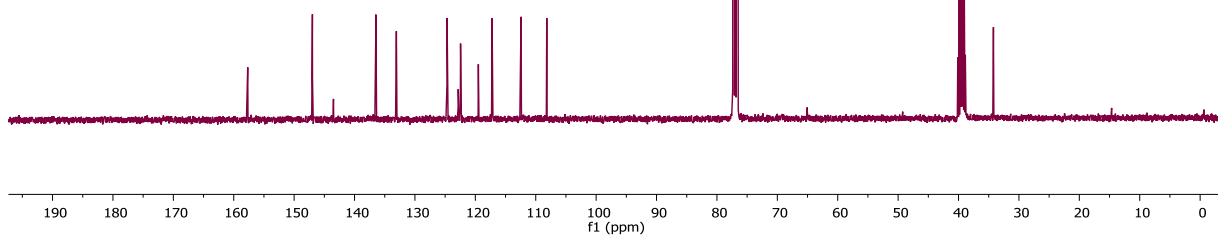

|               |           |             |                      |                 |              |                        |                      |
|---------------|-----------|-------------|----------------------|-----------------|--------------|------------------------|----------------------|
| Sample Name   | OSP-122   | Position    | P1-B5                | Instrument Name | Instrument 1 | User Name              |                      |
| Inj Vol       | 0.25      | InjPosition |                      | SampleType      | Sample       | IRM Calibration Status | Success              |
| Data Filename | OSP-122.d | ACQ Method  | water_acn_grad_6min_ | Comment         |              | Acquired Time          | 4/3/2018 12:23:21 PM |

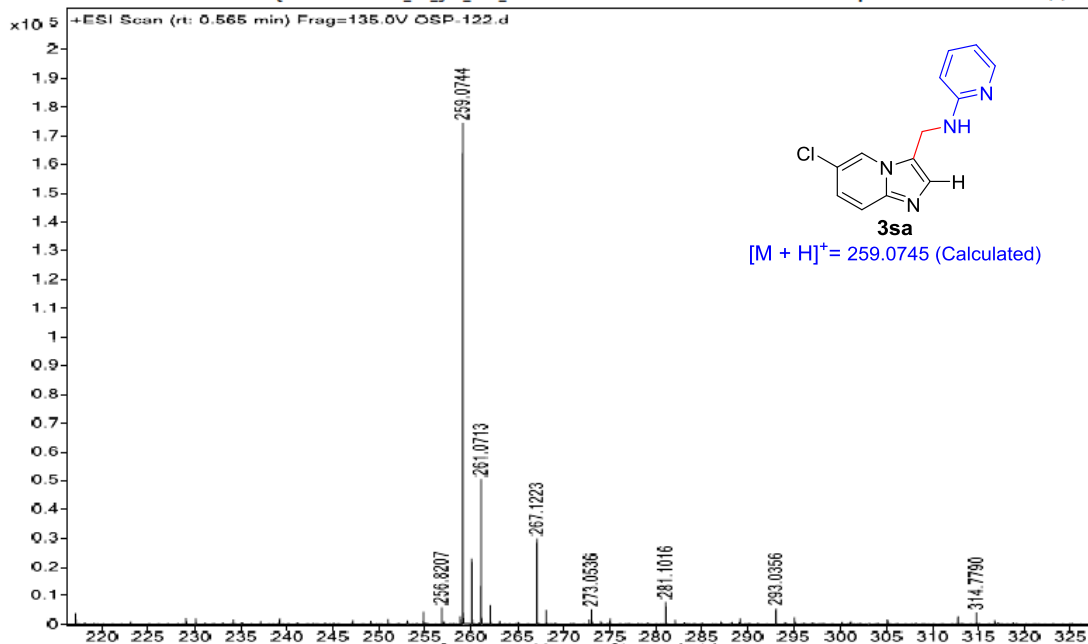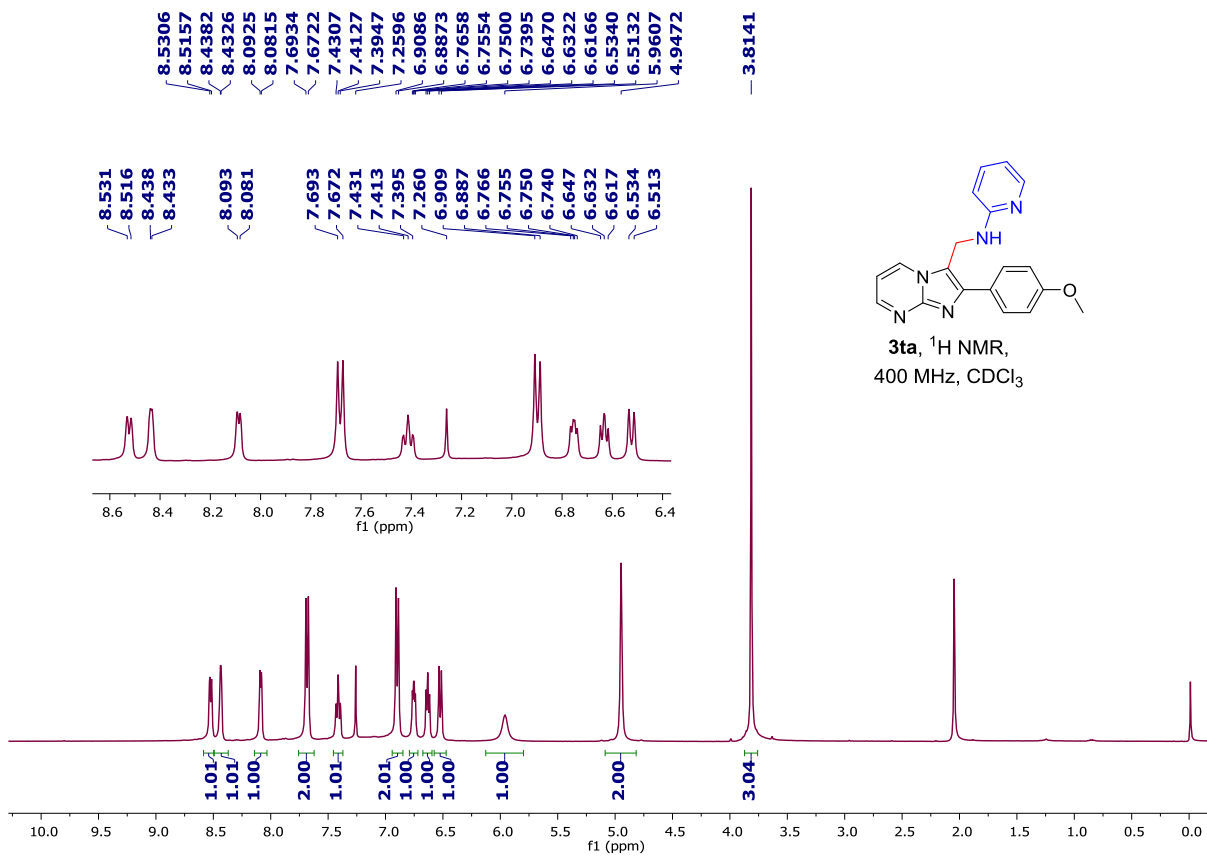

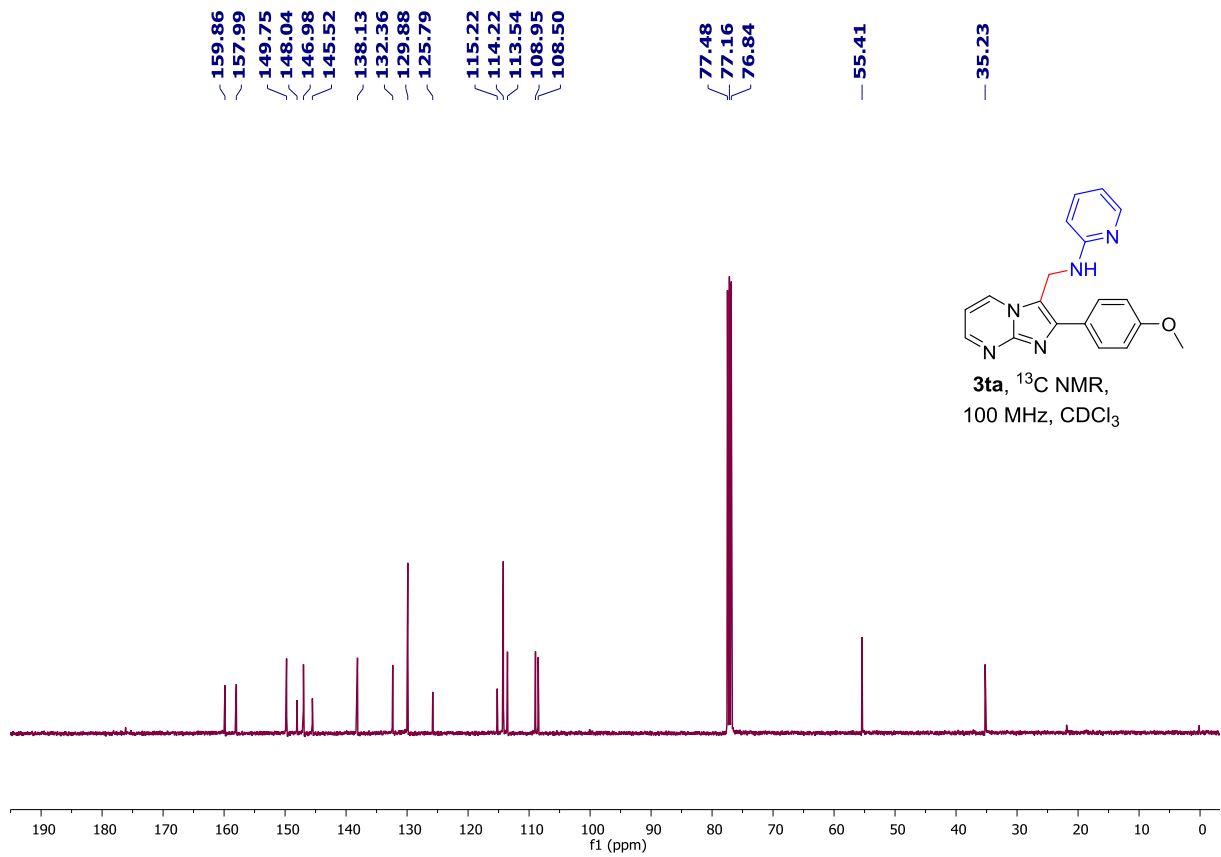

|               |          |             |                      |                 |              |                        |                       |
|---------------|----------|-------------|----------------------|-----------------|--------------|------------------------|-----------------------|
| Sample Name   | OSP-50   | Position    | P2-F8                | Instrument Name | Instrument 1 | User Name              |                       |
| Inj Vol       | 0.2      | InjPosition |                      | SampleType      | Sample       | IRM Calibration Status | Success               |
| Data Filename | OSP-50.d | ACQ Method  | water_acn_grad_6min_ | Comment         |              | Acquired Time          | 10/12/2017 6:40:56 PM |

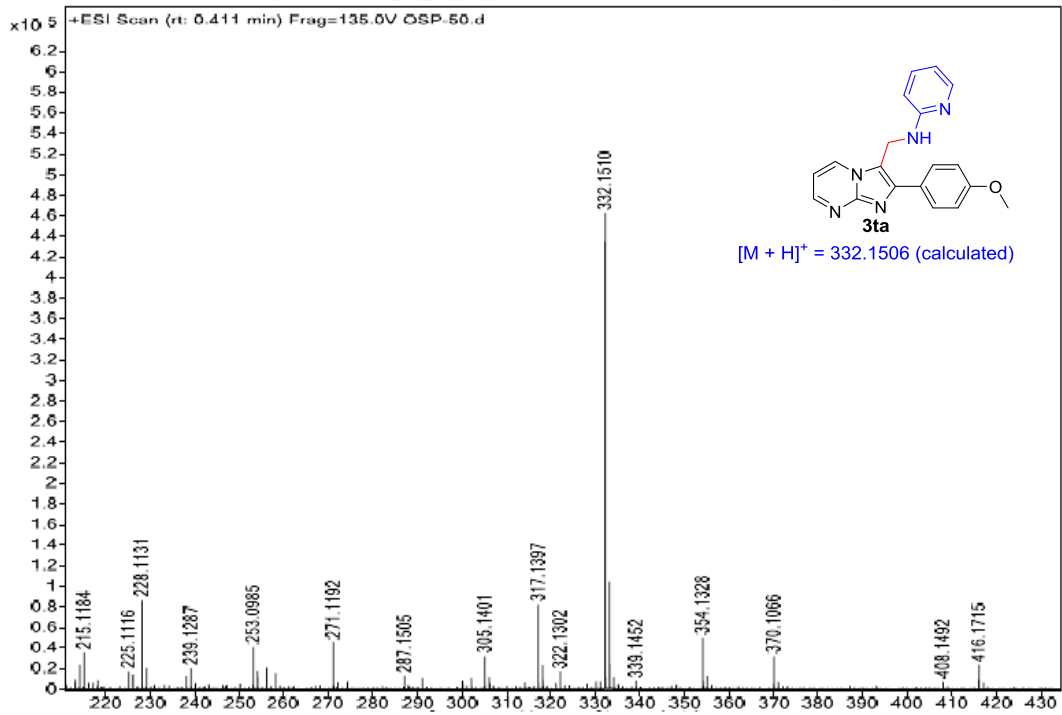



Oct17-2018/7  
OSP-70

8.1554  
8.1533  
8.1510  
8.1489  
8.1417  
8.1372  
7.7117  
7.7079  
7.7031  
7.6939  
7.6903  
7.6877  
7.5881  
7.5769  
7.4376  
7.4245  
7.4193  
7.4154  
7.4070  
7.4033  
7.3995  
7.3860  
7.3812  
7.3424  
7.3390  
7.3356  
7.3256  
7.3206  
7.3153  
7.3054  
7.3020  
7.2987  
7.2597  
6.7701  
6.7588  
6.6541  
6.6519  
6.6414  
6.6392  
6.6361  
6.6339  
6.6235  
6.6212  
6.4158  
6.3949  
4.9382  
4.9248  
4.7520  
4.7402  
4.7290

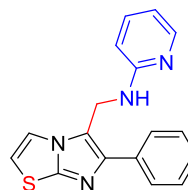

**3ua**,  $^1\text{H}$  NMR,  
400 MHz,  $\text{CDCl}_3$

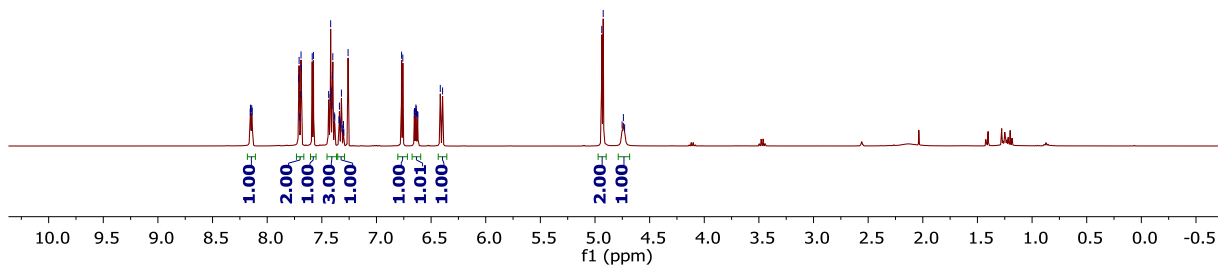

OSP-70

158.12  
149.25  
147.90  
145.35  
137.60  
134.39  
128.72  
127.76  
127.53  
119.71  
118.58  
113.73  
112.26  
108.47  
77.48  
77.16  
76.84  
36.30

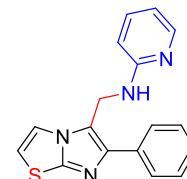

**3ua**,  $^{13}\text{C}$  NMR,  
100 MHz,  $\text{CDCl}_3$

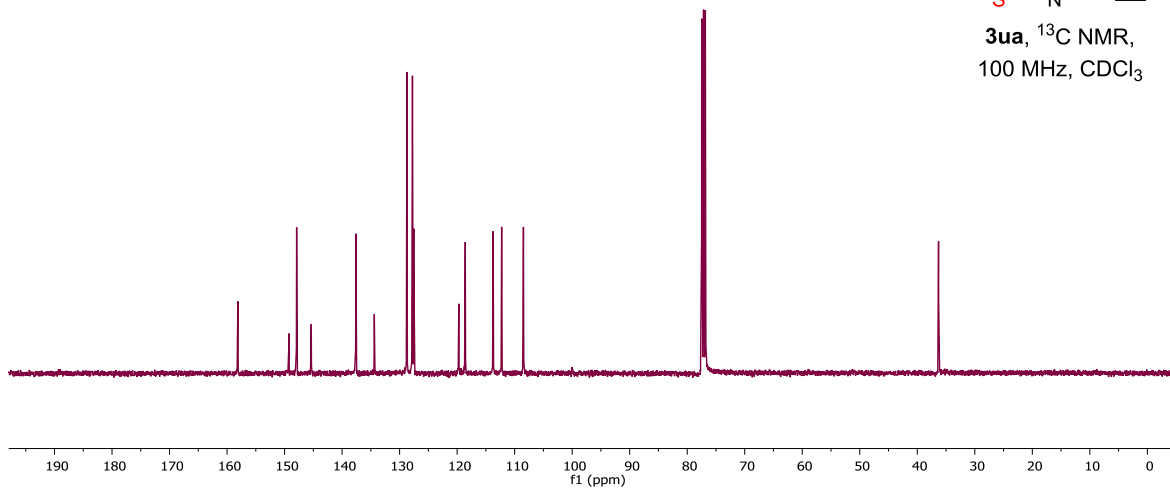

|               |          |             |                      |                 |              |                        |                      |
|---------------|----------|-------------|----------------------|-----------------|--------------|------------------------|----------------------|
| Sample Name   | OSP-70   | Position    | P2-D8                | Instrument Name | Instrument 1 | User Name              |                      |
| Inj Vol       | 0.25     | InjPosition |                      | SampleType      | Sample       | IRM Calibration Status | Success              |
| Data Filename | OSP-70.d | ACQ Method  | water_acn_grad_6min_ | Comment         |              | Acquired Time          | 1/17/2018 5:33:47 PM |

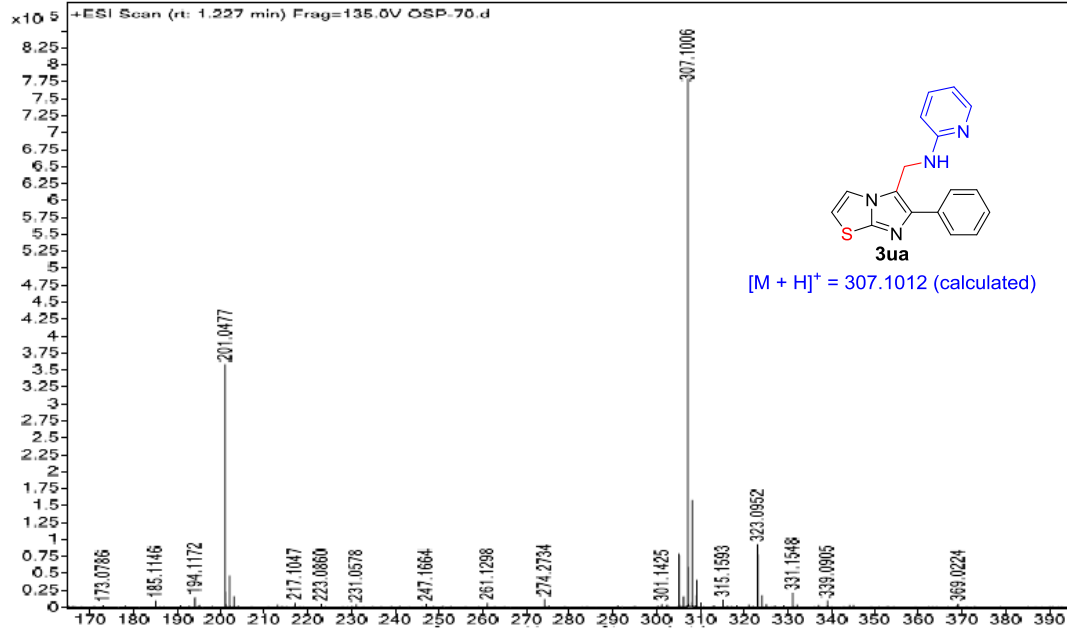

8.1750  
 8.1705  
 8.1619  
 8.1575  
 8.1006  
 8.0834  
 7.8261  
 7.8060  
 7.5988  
 7.5828  
 7.5784  
 7.5602  
 7.4560  
 7.4521  
 7.4483  
 7.2603  
 7.1889  
 7.1849  
 6.7665  
 6.7495  
 6.7326  
 6.6871  
 6.6741  
 6.6692  
 6.6565  
 6.5743  
 6.5535  
 5.0893  
 5.0766  
 5.0642  
 4.9595  
 4.9481

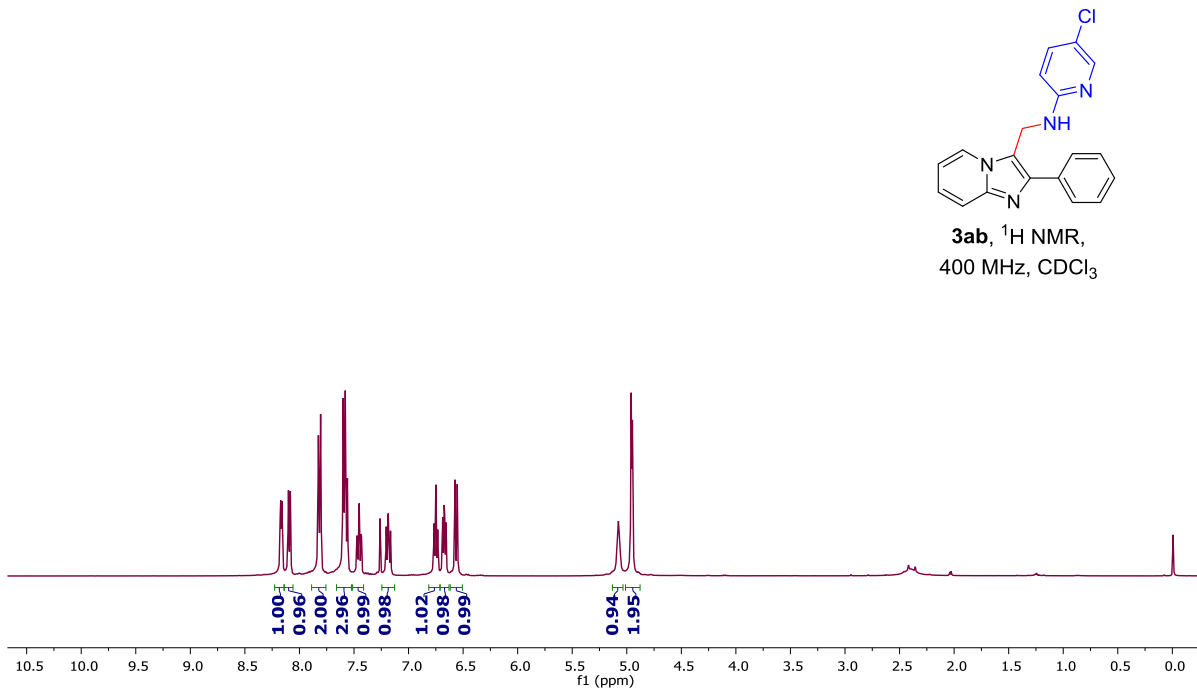

Feb19-2018/1  
OSP-103

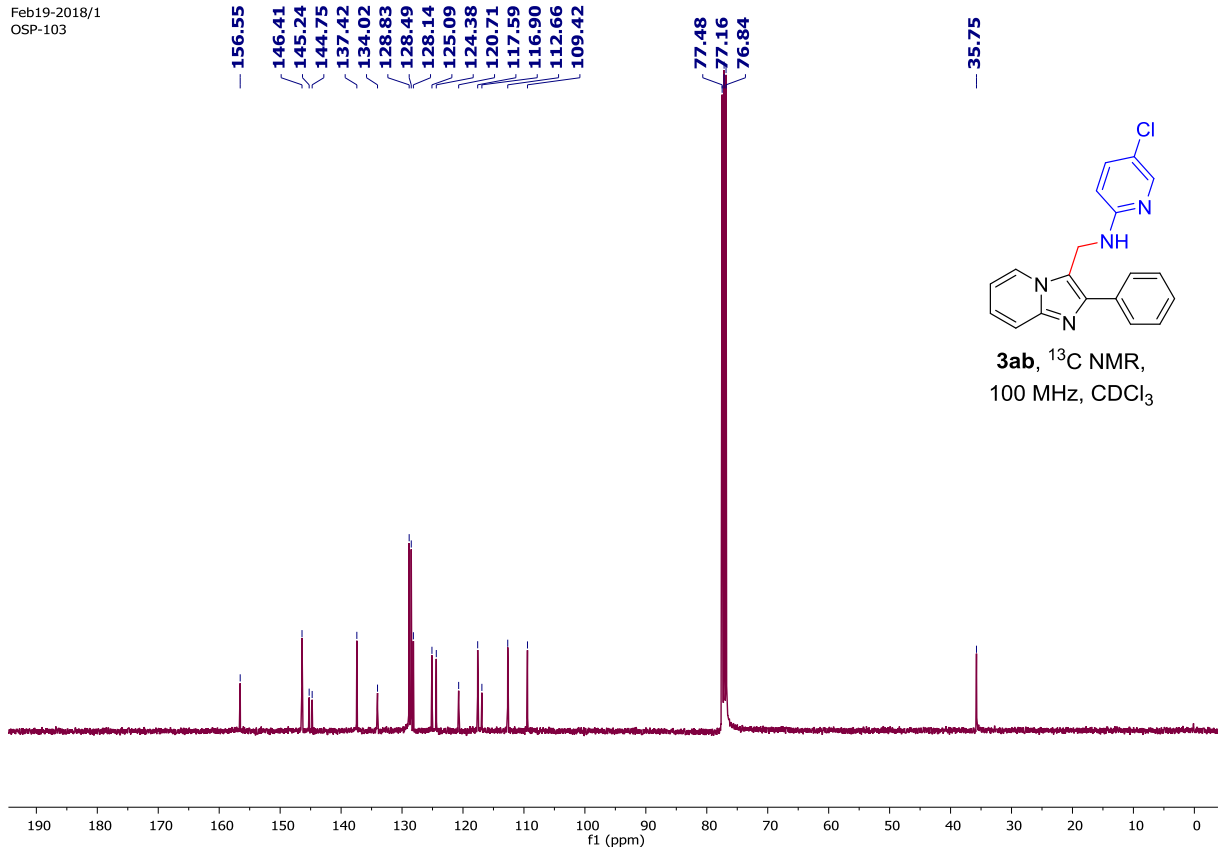

|               |           |             |                      |                 |              |                        |                      |
|---------------|-----------|-------------|----------------------|-----------------|--------------|------------------------|----------------------|
| Sample Name   | OSP-103   | Position    | P2-D8                | Instrument Name | Instrument 1 | User Name              |                      |
| Inj Vol       | 1         | InjPosition |                      | SampleType      | Sample       | IRM Calibration Status | Success              |
| Data Filename | OSP-103.d | ACQ Method  | water_acn_grad_6min_ | Comment         |              | Acquired Time          | 4/12/2018 1:27:06 PM |

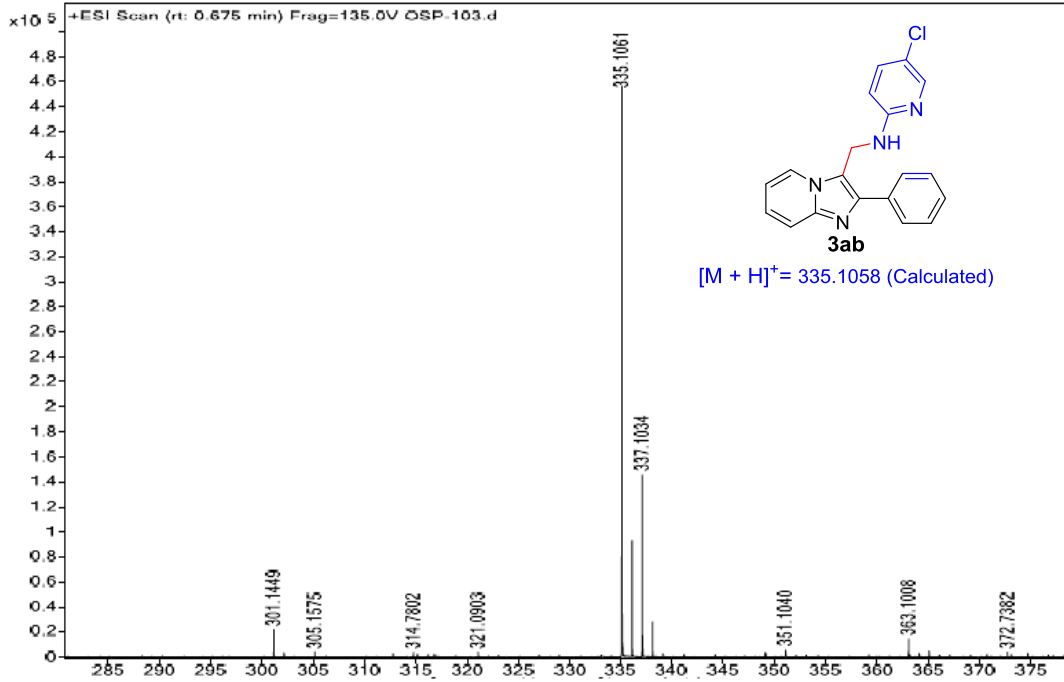

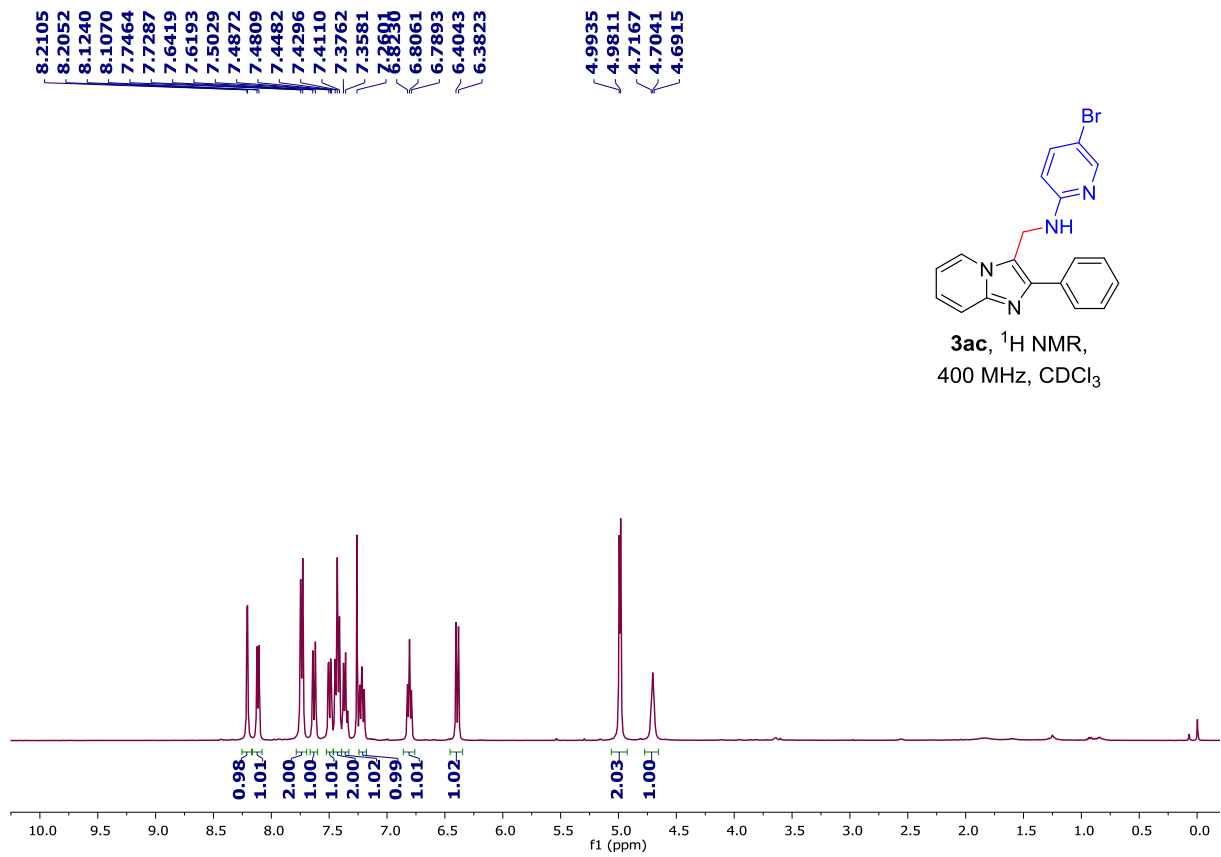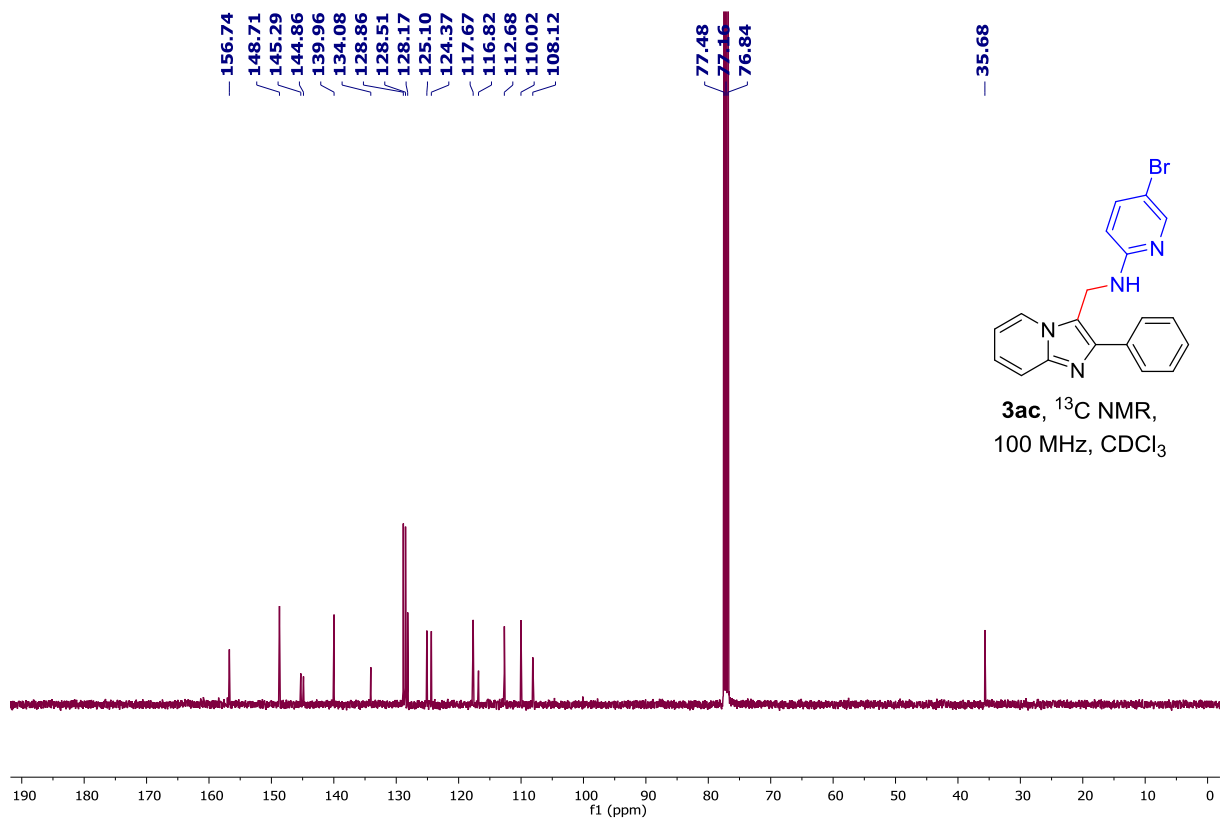

|               |          |             |                      |                 |              |                        |                      |
|---------------|----------|-------------|----------------------|-----------------|--------------|------------------------|----------------------|
| Sample Name   | OSP-51   | Position    | P2-E8                | Instrument Name | Instrument 1 | User Name              |                      |
| Inj Vol       | 0.25     | InjPosition |                      | SampleType      | Sample       | IRM Calibration Status | Success              |
| Data Filename | OSP-51.d | ACQ Method  | water_acn_grad_6min_ | Comment         |              | Acquired Time          | 12/8/2017 1:54:29 PM |

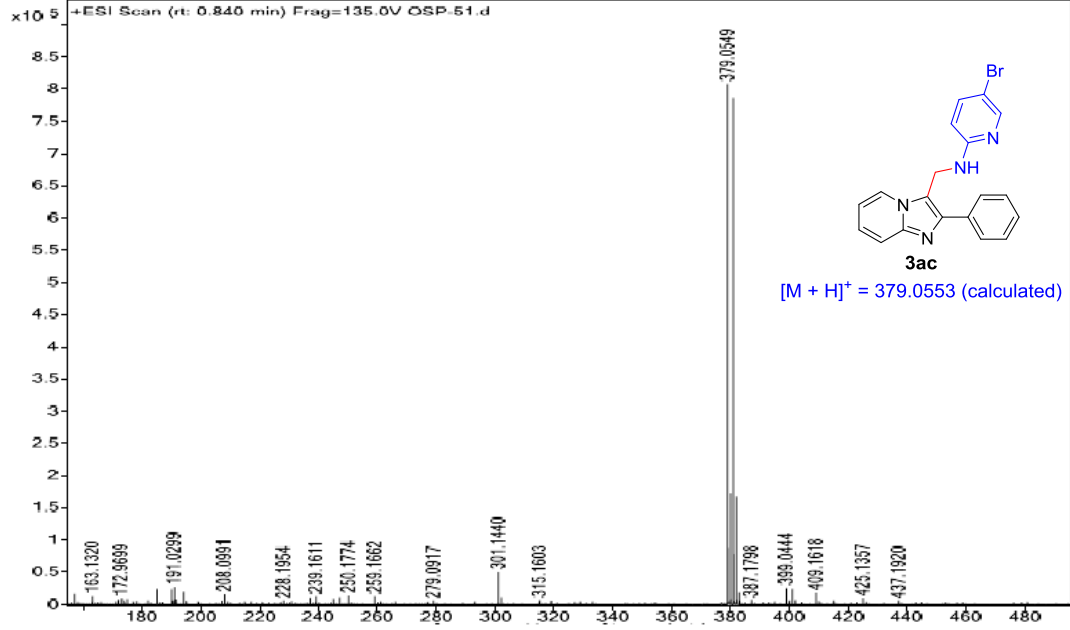

8.1589  
 8.1417  
 8.0050  
 7.9919  
 7.7759  
 7.7579  
 7.6347  
 7.6121  
 7.4502  
 7.4322  
 7.4130  
 7.3713  
 7.3531  
 7.2604  
 6.7859  
 6.7689  
 6.7520  
 6.4941  
 6.4813  
 6.2467

4.9876  
 4.9756  
 4.7205

2.2014

OSP-87

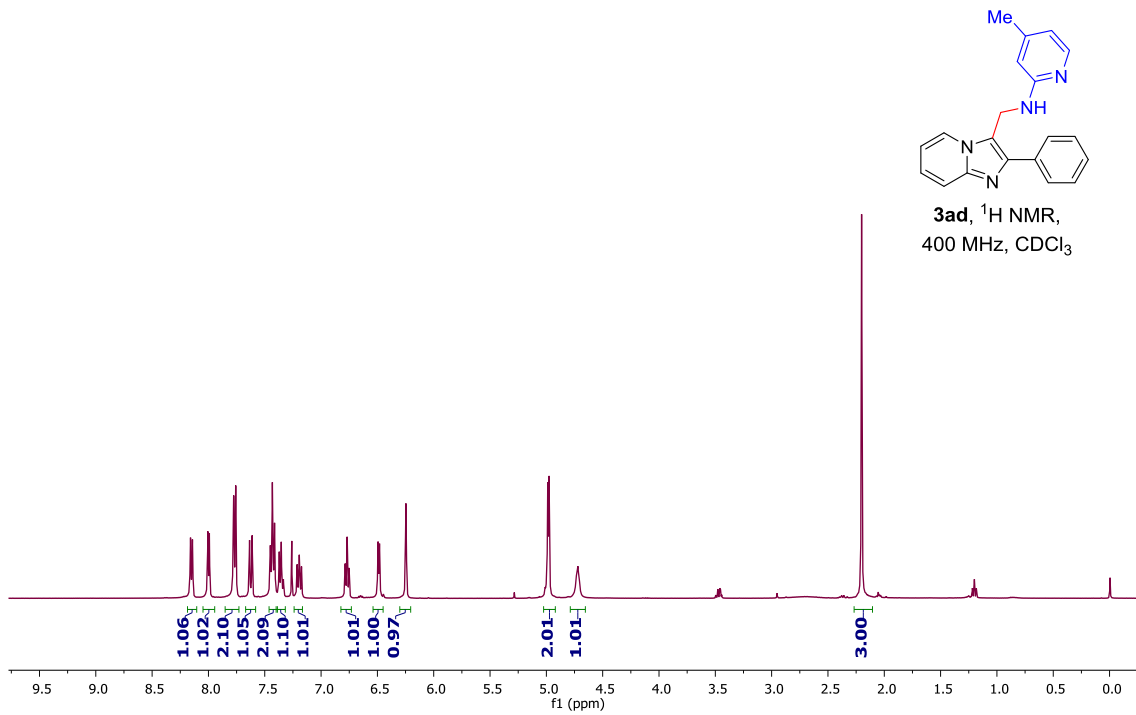

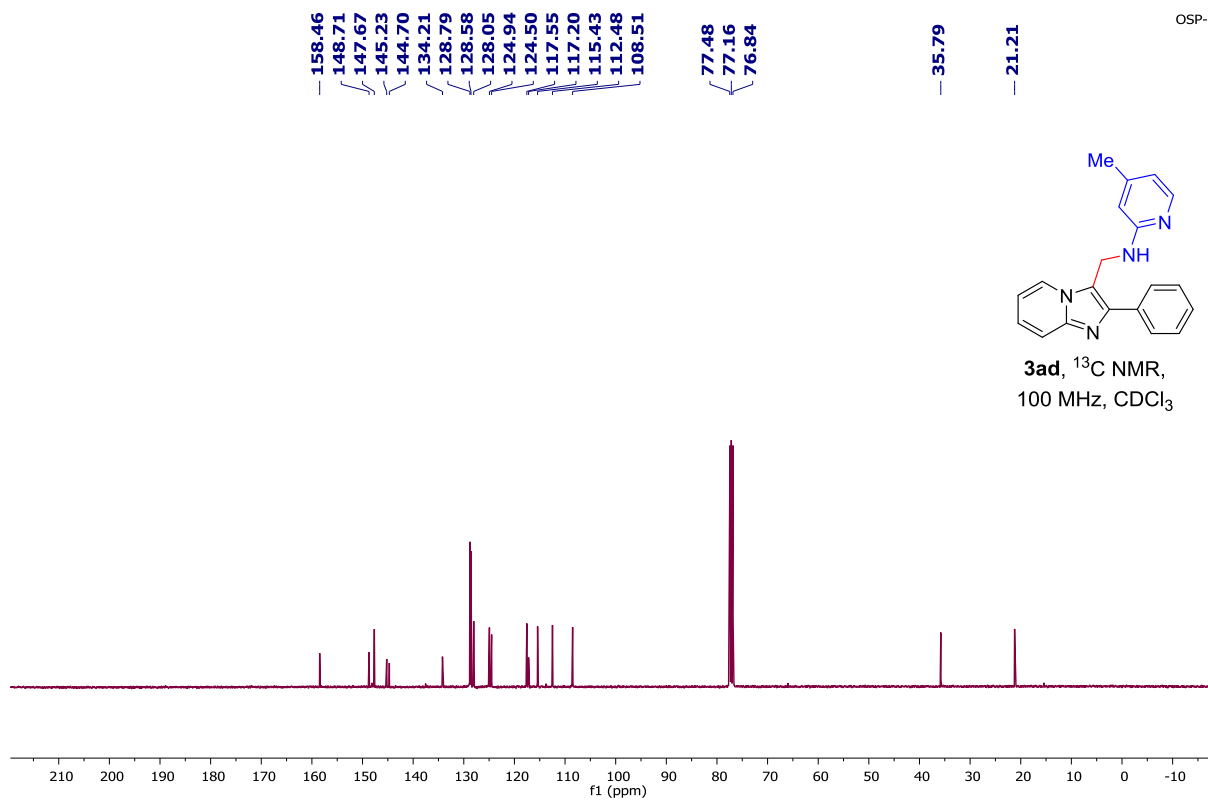

| Sample Name   | OSP-87   | Position    | P2-D6                | Instrument Name | Instrument 1 | User Name              |                      |
|---------------|----------|-------------|----------------------|-----------------|--------------|------------------------|----------------------|
| Inj Vol       | 0.25     | InjPosition |                      | SampleType      | Sample       | IRM Calibration Status | Success              |
| Data Filename | OSP-87.d | ACQ Method  | water_acn_grad_6min_ | Comment         |              | Acquired Time          | 1/17/2018 5:05:31 PM |

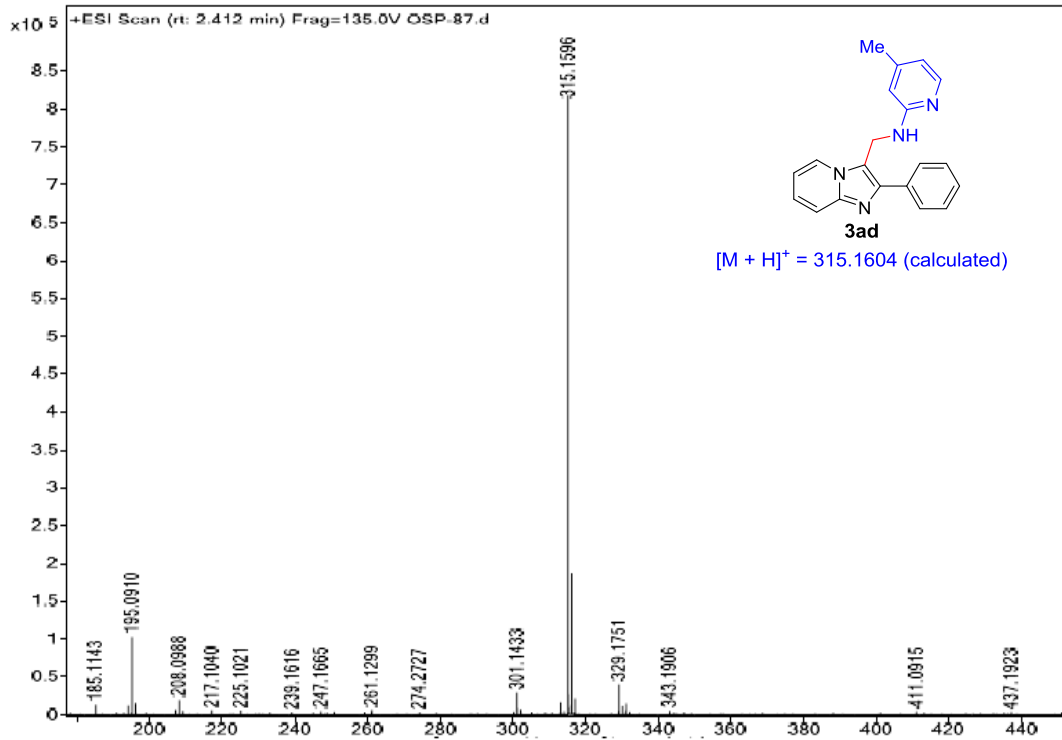

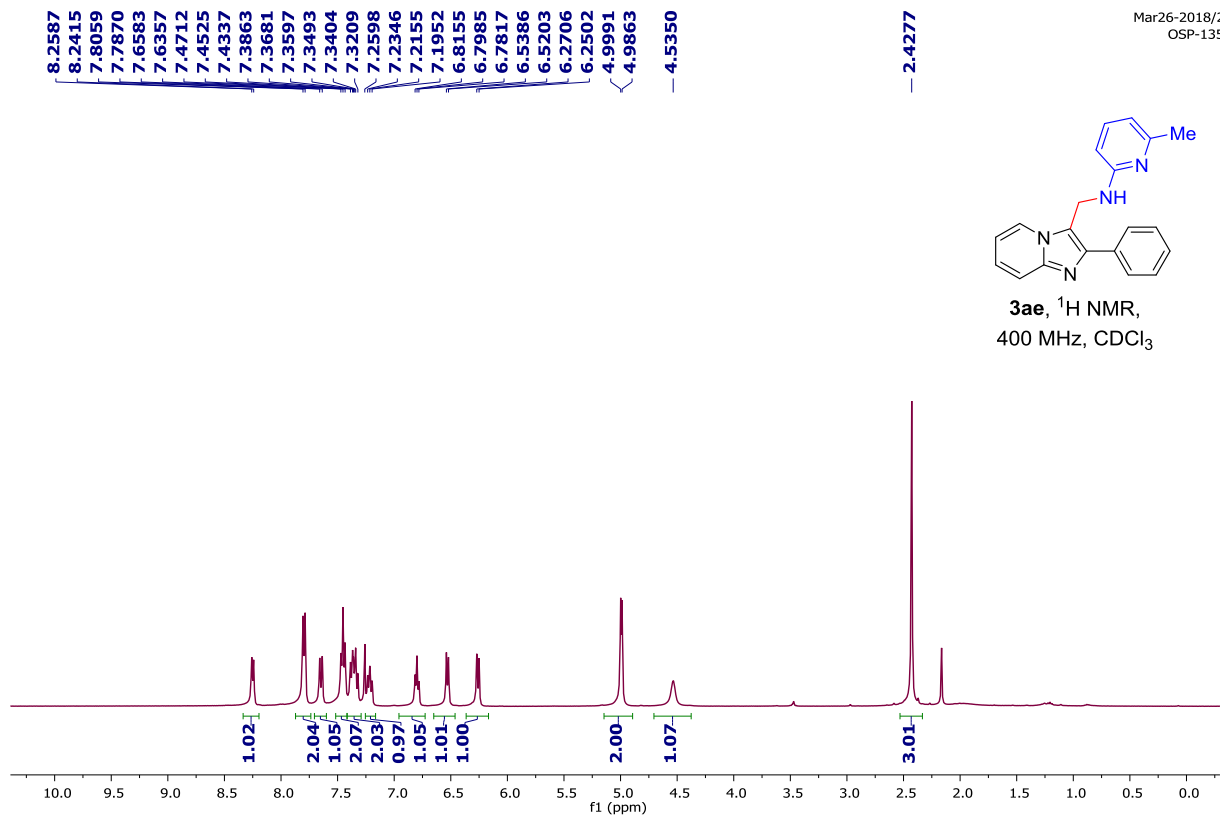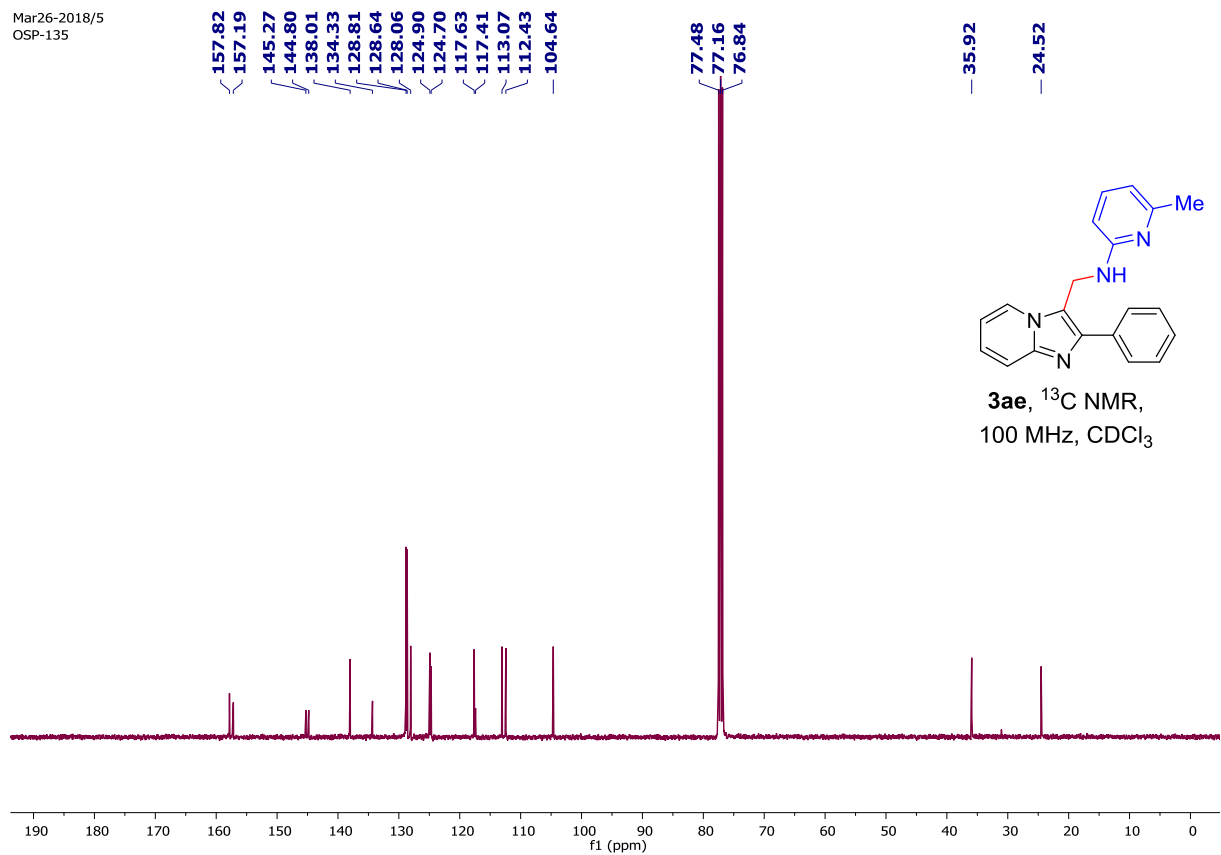

|               |           |             |                      |                 |              |                        |                      |
|---------------|-----------|-------------|----------------------|-----------------|--------------|------------------------|----------------------|
| Sample Name   | OSP-135   | Position    | P1-B4                | Instrument Name | Instrument 1 | User Name              |                      |
| Inj Vol       | 0.25      | InjPosition |                      | SampleType      | Sample       | IRM Calibration Status | Success              |
| Data Filename | OSP-135.d | ACQ Method  | water_acn_grad_6min_ | Comment         |              | Acquired Time          | 4/3/2018 12:09:06 PM |

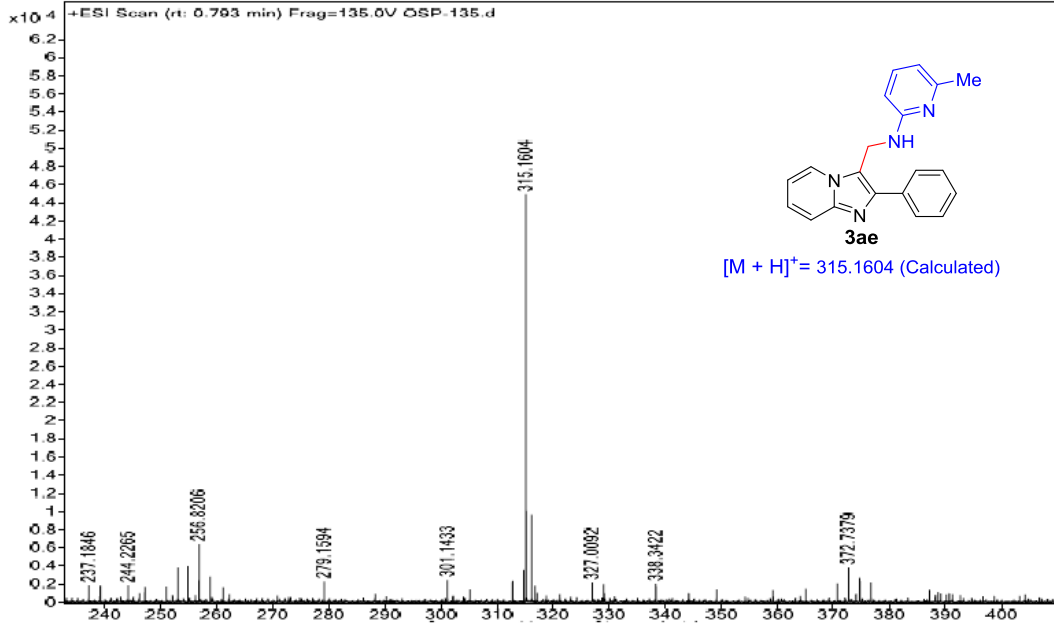

Oct17-2018/3  
OSP-79

8.2627  
8.2416  
8.0621  
8.0469  
7.9613  
7.9402  
7.3892  
7.2597  
6.6794  
6.6619  
6.5552  
6.5420  
6.3224  
4.9900  
4.9779  
4.6104  
4.5975  
4.5845  
2.4204  
2.2521

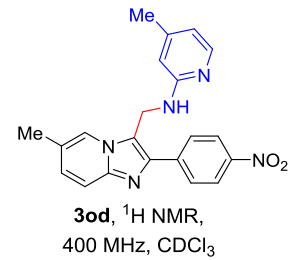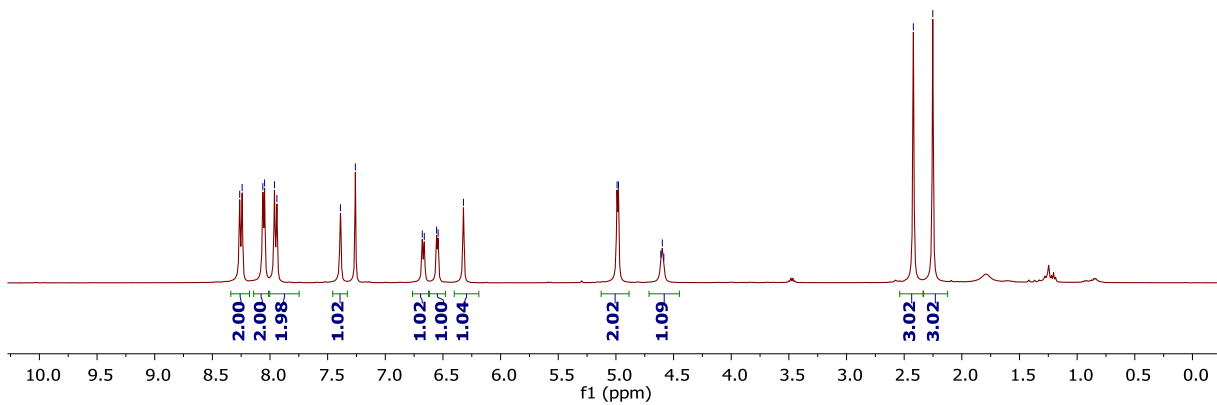



OSP-79

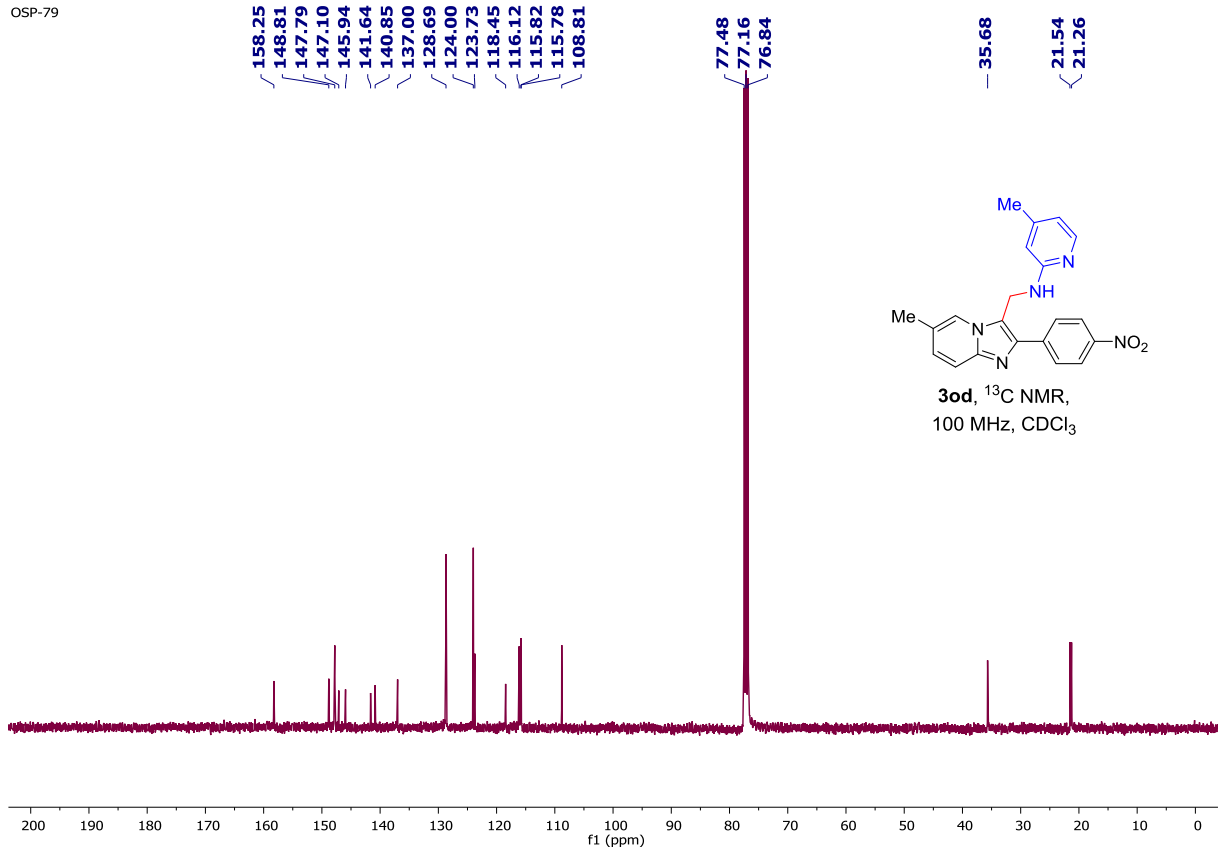

| Sample Name   | OSP-79   | Position    | P1-B6                | Instrument Name | Instrument 1 | User Name              |                      |
|---------------|----------|-------------|----------------------|-----------------|--------------|------------------------|----------------------|
| Inj Vol       | 0.25     | InjPosition |                      | SampleType      | Sample       | IRM Calibration Status | Success              |
| Data Filename | OSP-79.d | ACQ Method  | water_acn_grad_6min_ | Comment         |              | Acquired Time          | 4/3/2018 12:37:36 PM |

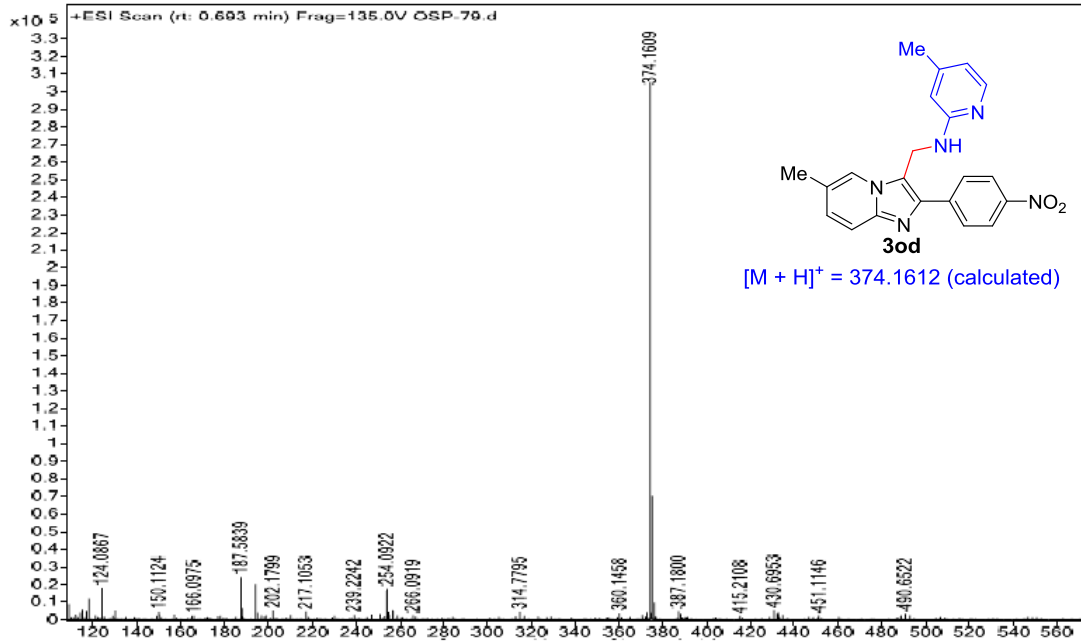

OSP-75

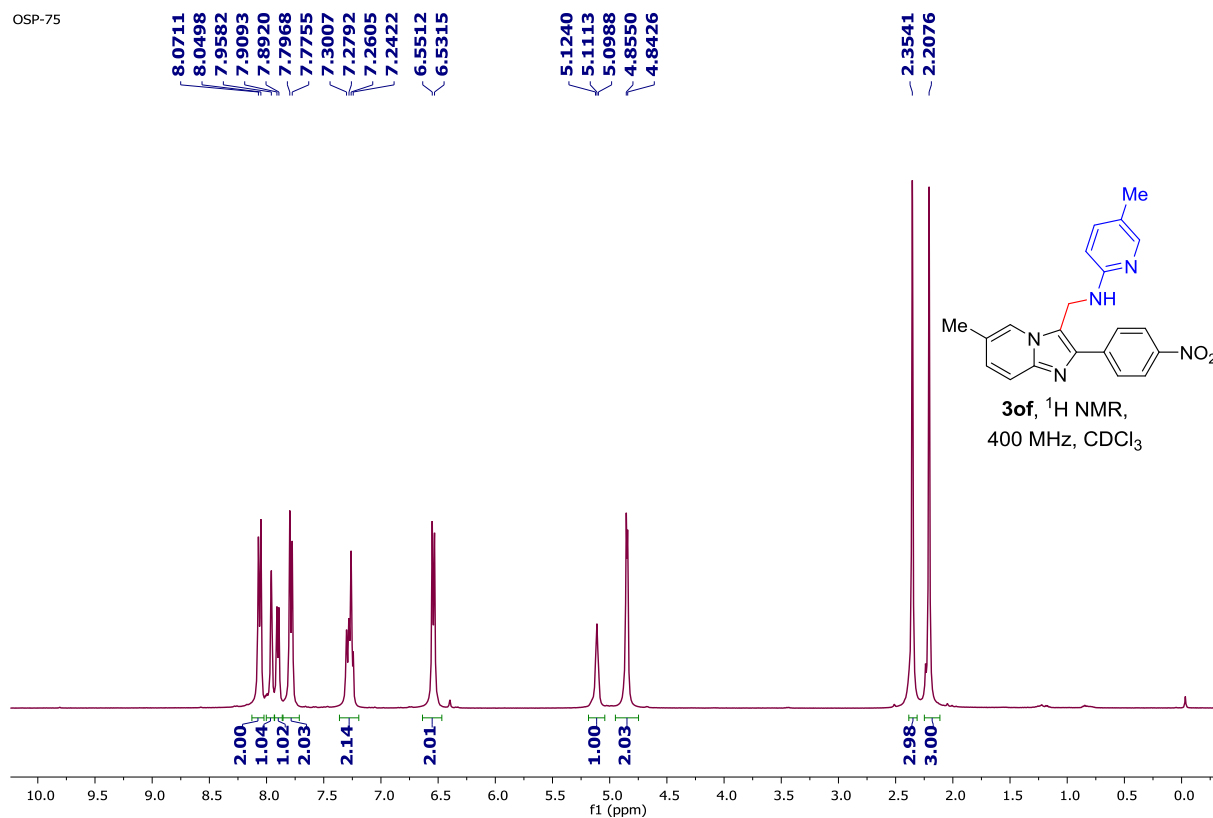

OSP-75

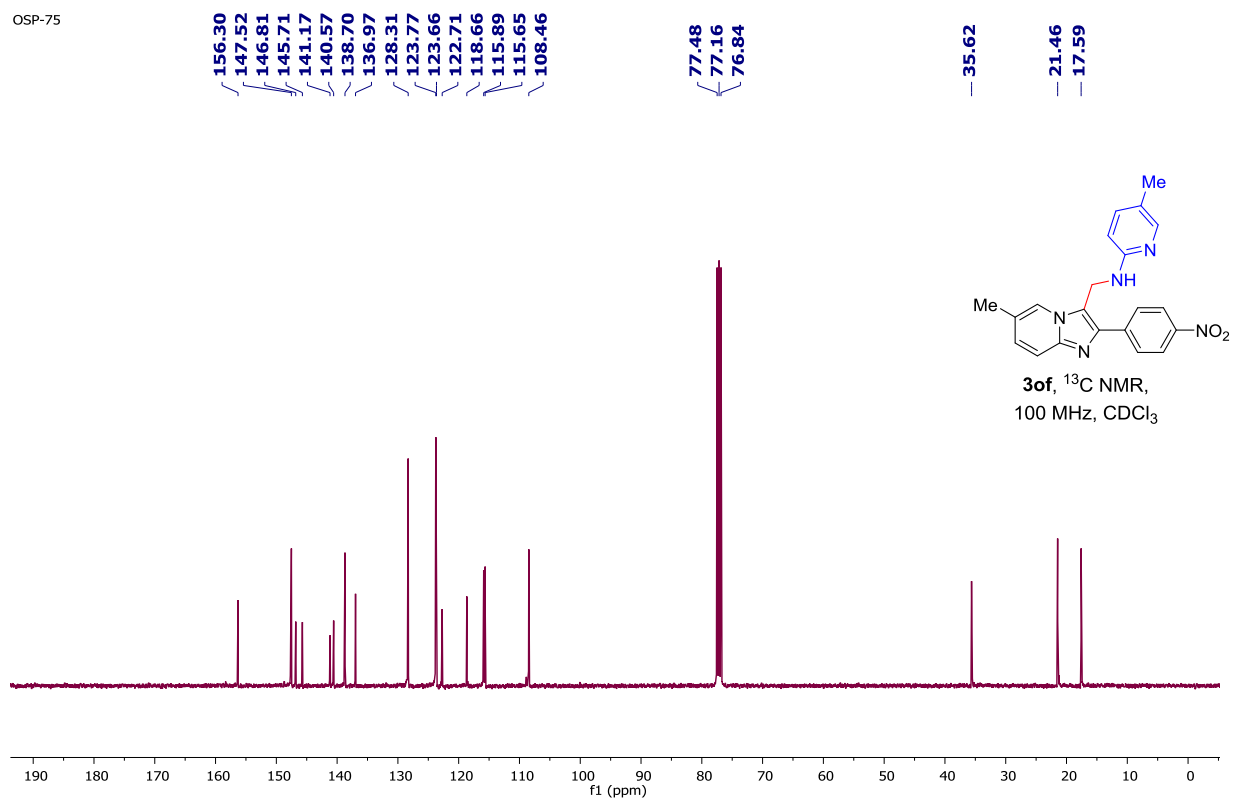

|               |          |             |                      |                 |              |                        |                      |
|---------------|----------|-------------|----------------------|-----------------|--------------|------------------------|----------------------|
| Sample Name   | OSP-75   | Position    | P1-B7                | Instrument Name | Instrument 1 | User Name              |                      |
| Inj Vol       | 0.25     | InjPosition |                      | SampleType      | Sample       | IRM Calibration Status | Success              |
| Data Filename | OSP-75.d | ACQ Method  | water_acn_grad_6min_ | Comment         |              | Acquired Time          | 1/24/2018 5:08:58 PM |

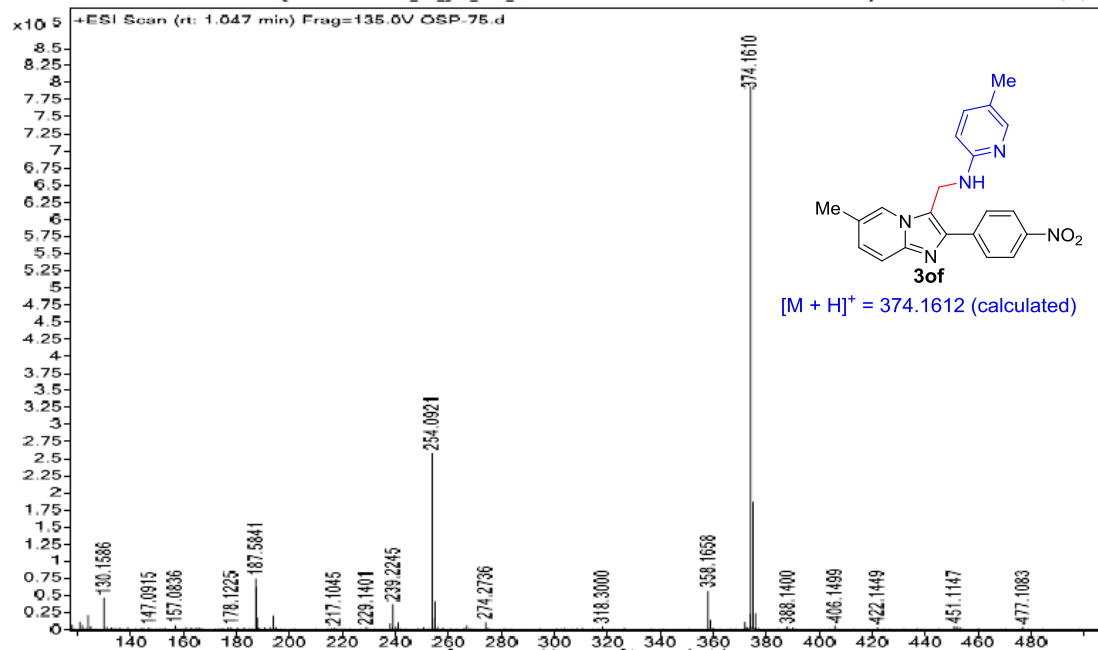

8.1881  
8.1728  
7.7907  
7.7717  
7.6531  
7.6304  
7.4597  
7.4414  
7.4236  
7.4111  
7.3795  
7.3613  
7.3428  
7.2599  
7.2324  
7.2133  
7.1928  
6.8143  
6.7973  
6.7806  
6.6776  
6.6630  
6.6469  
6.4644  
6.4435  
5.0311  
5.0186  
4.5915

Mar26-2018/4  
OSP-145

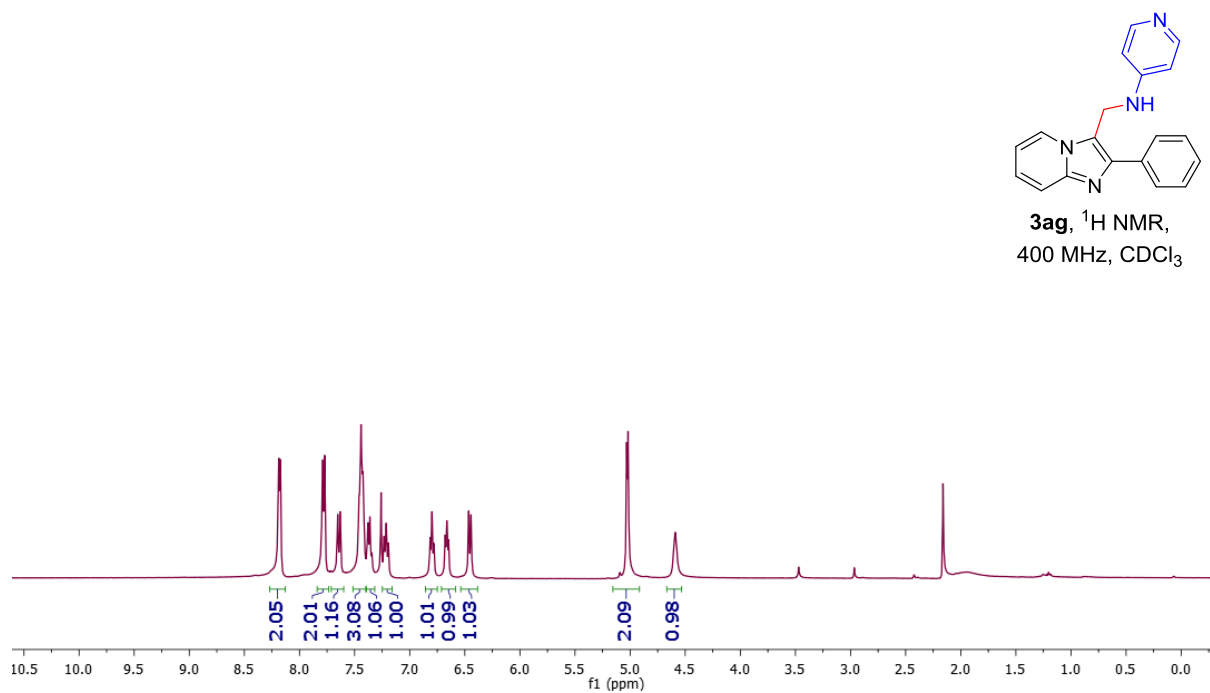

Mar26-2018/6  
OSP-145

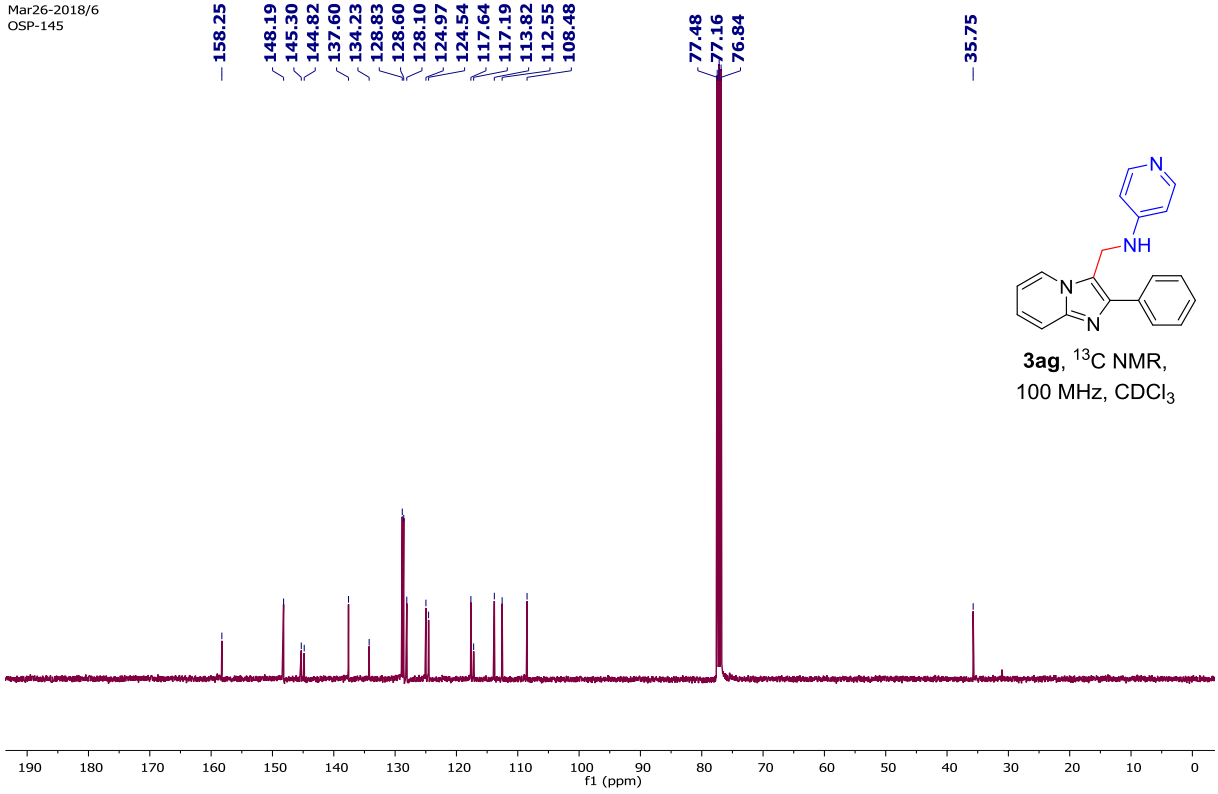

|               |           |             |                      |                 |              |                        |                      |
|---------------|-----------|-------------|----------------------|-----------------|--------------|------------------------|----------------------|
| Sample Name   | OSP-145   | Position    | P1-B3                | Instrument Name | Instrument 1 | User Name              |                      |
| Inj Vol       | 0.25      | InjPosition |                      | SampleType      | Sample       | IRM Calibration Status | Success              |
| Data Filename | OSP-145.d | ACQ Method  | water_acn_grad_6min_ | Comment         |              | Acquired Time          | 4/3/2018 11:54:56 AM |

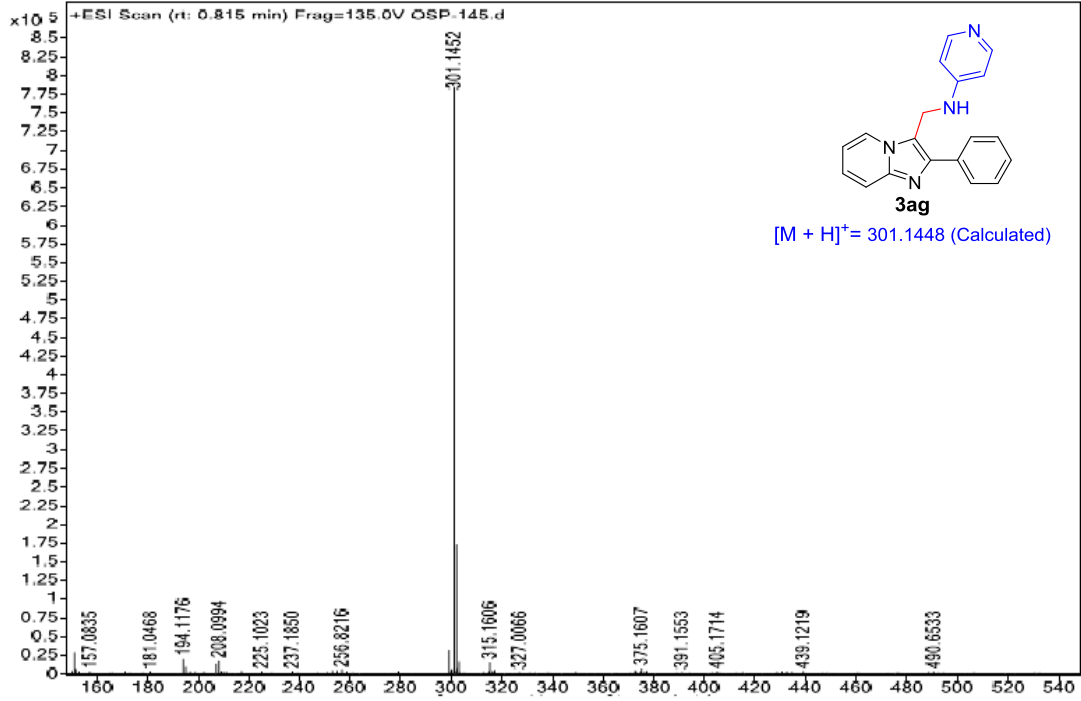

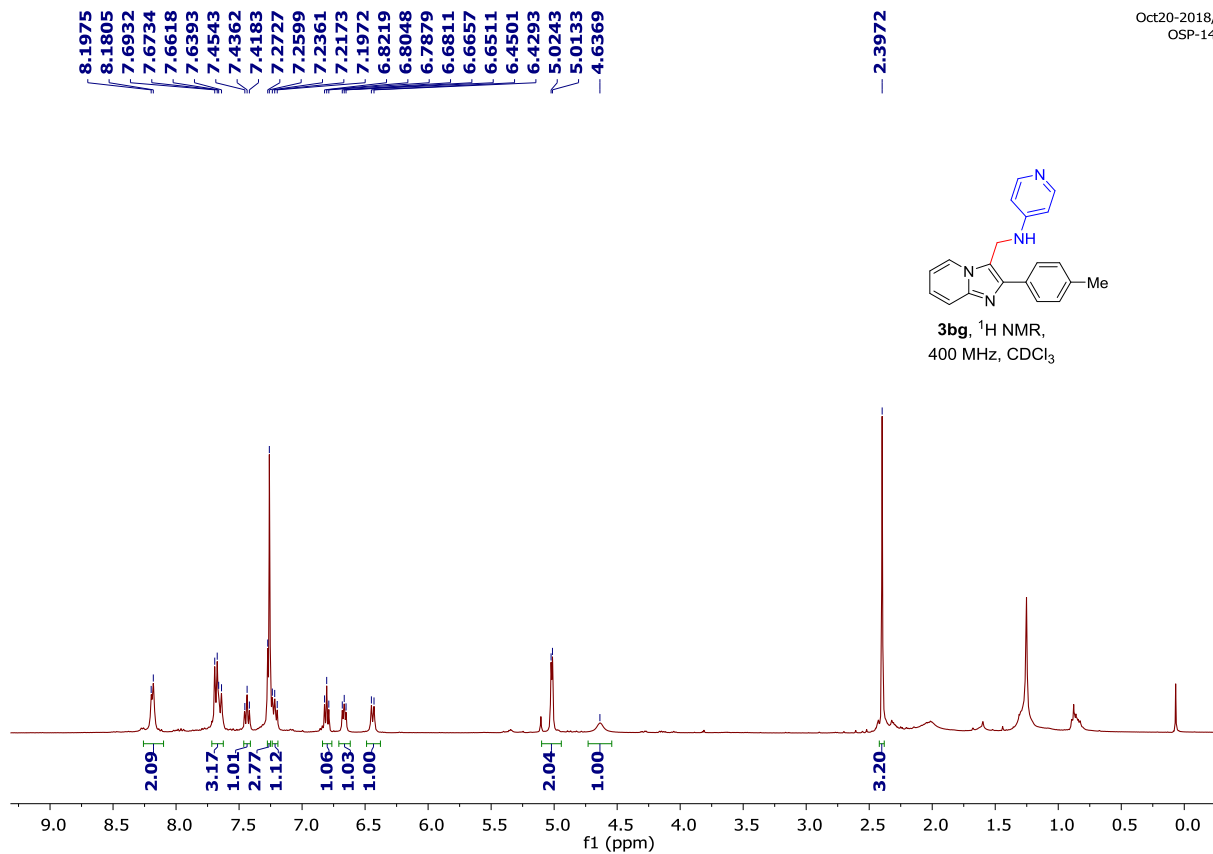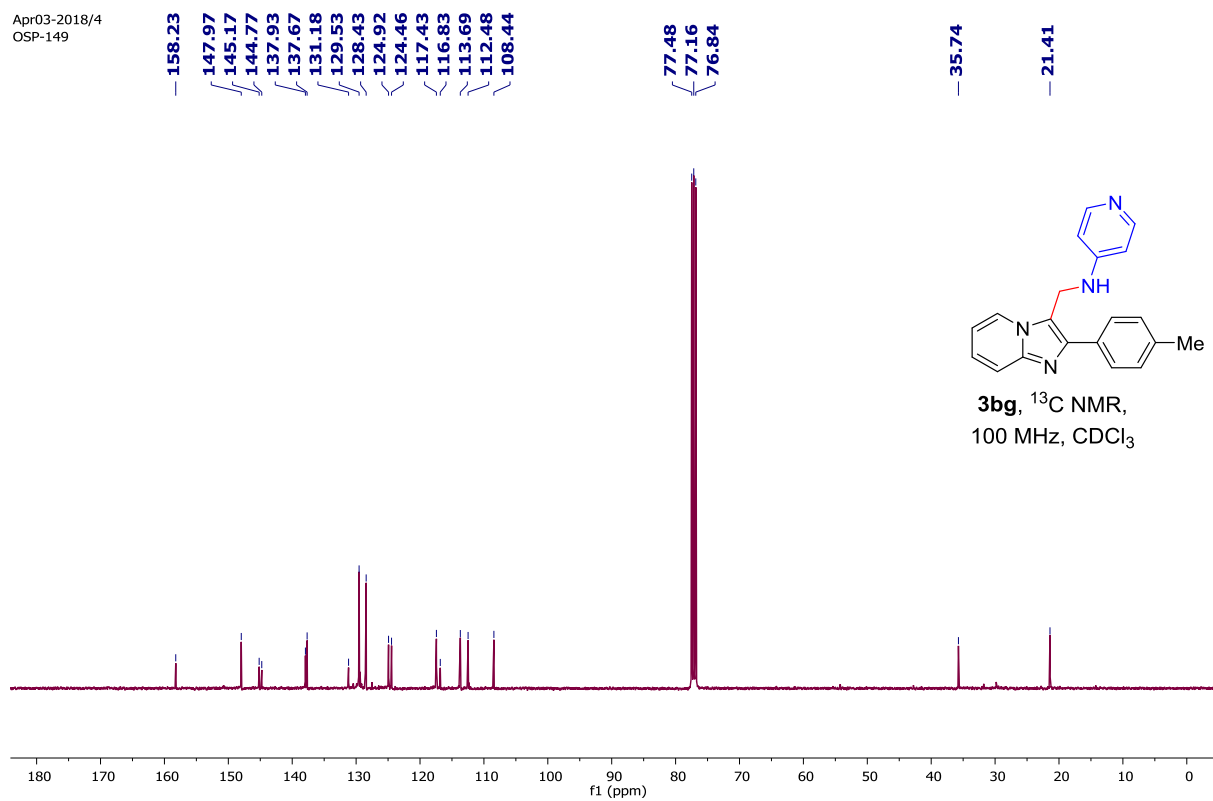

|               |           |             |                      |                 |              |                        |                      |
|---------------|-----------|-------------|----------------------|-----------------|--------------|------------------------|----------------------|
| Sample Name   | OSP-149   | Position    | P1-B2                | Instrument Name | Instrument 1 | User Name              |                      |
| Inj Vol       | 0.25      | InjPosition |                      | SampleType      | Sample       | IRM Calibration Status | Success              |
| Data Filename | OSP-149.d | ACQ Method  | water_acn_grad_6min_ | Comment         |              | Acquired Time          | 4/3/2018 11:40:42 AM |

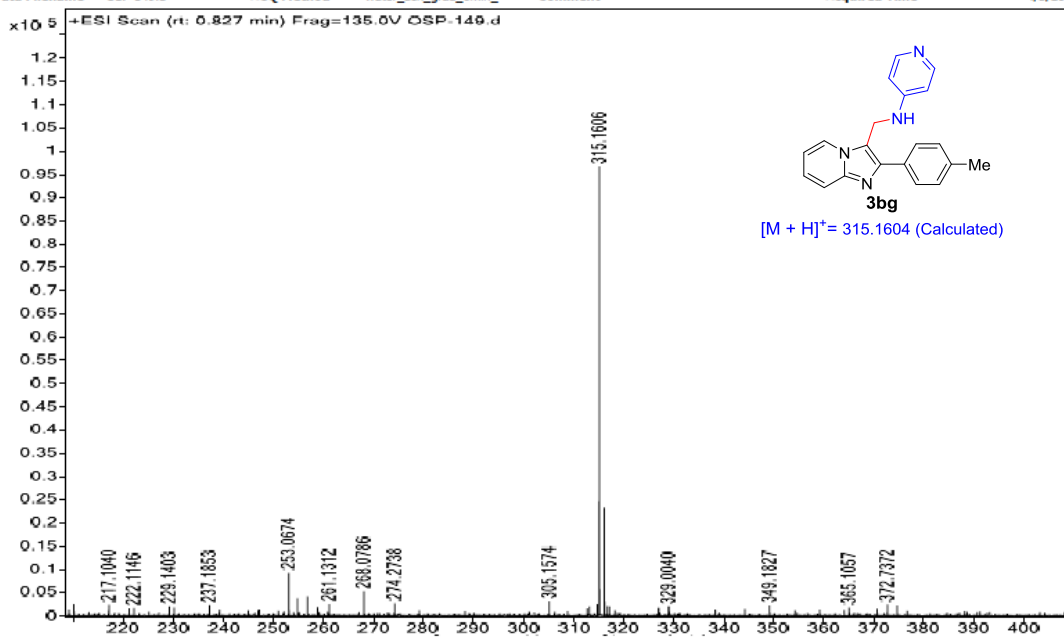

8.2008  
 8.1842  
 7.8047  
 7.7866  
 7.6772  
 7.6547  
 7.4841  
 7.4655  
 7.4467  
 7.4005  
 7.3823  
 7.3638  
 7.2597  
 7.2468  
 7.2284  
 7.2064  
 6.8199  
 6.8031  
 6.7861  
 6.5703  
 6.5583  
 5.8392  
 5.8242  
 5.8112  
 5.0942  
 5.0813

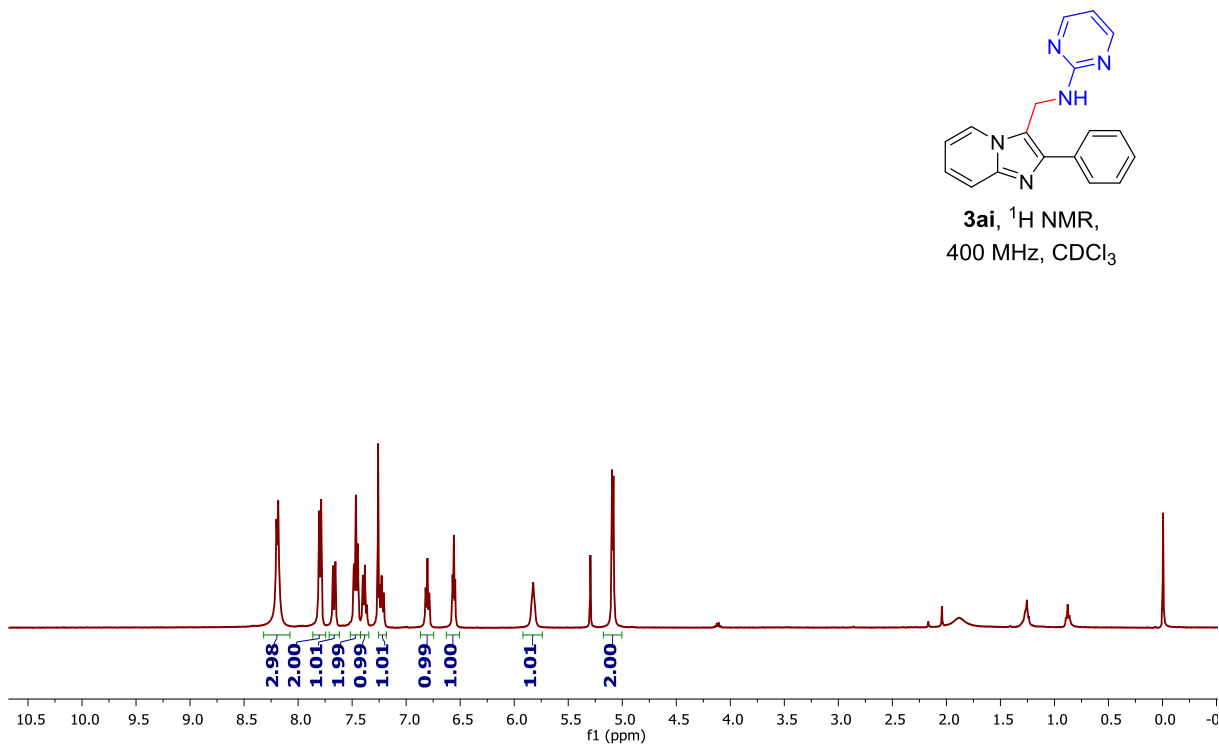

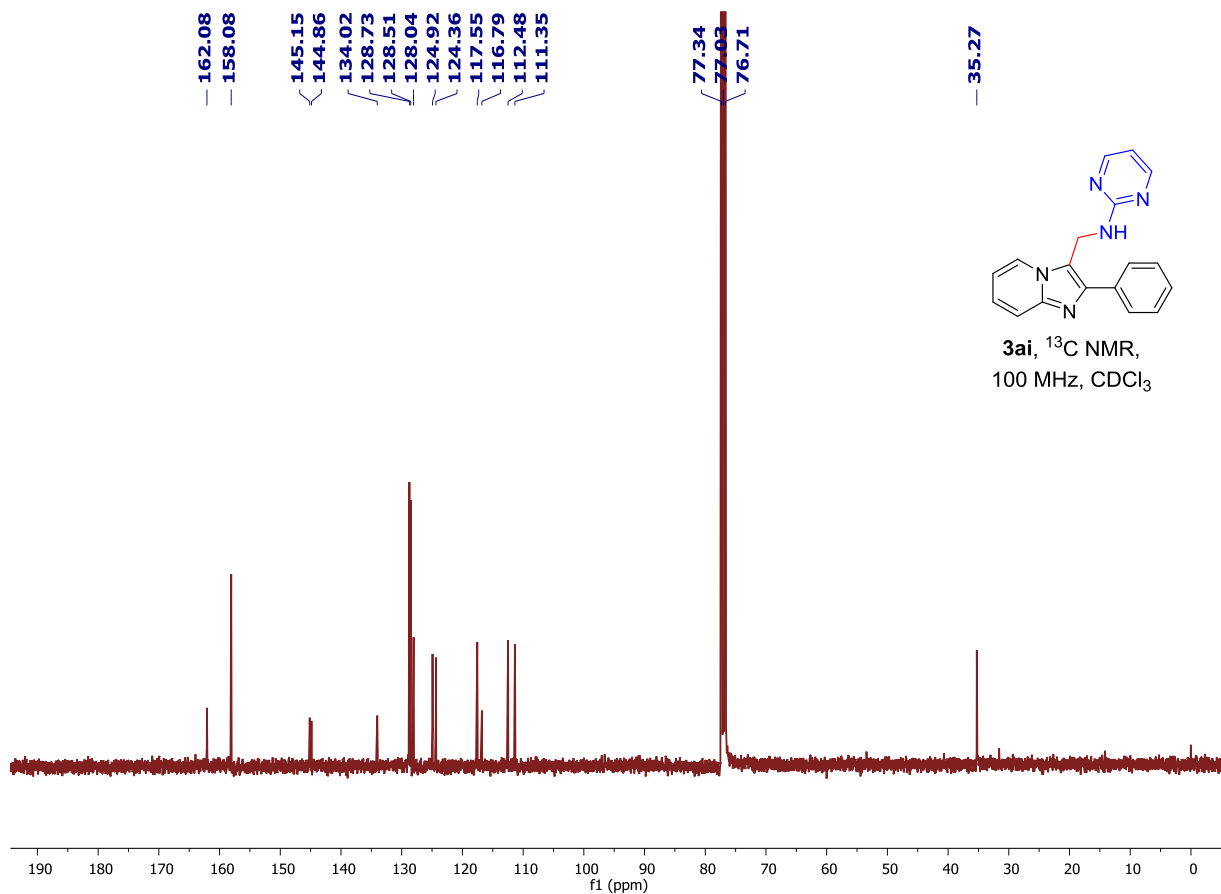

|               |          |             |                      |                 |              |                        |                       |
|---------------|----------|-------------|----------------------|-----------------|--------------|------------------------|-----------------------|
| Sample Name   | OSP-39   | Position    | P2-F1                | Instrument Name | Instrument 1 | User Name              |                       |
| Inj Vol       | 0.2      | InjPosition |                      | SampleType      | Sample       | IRM Calibration Status | Success               |
| Data Filename | OSP-39.d | ACQ Method  | water_acn_grad_6min_ | Comment         |              | Acquired Time          | 10/12/2017 5:01:51 PM |

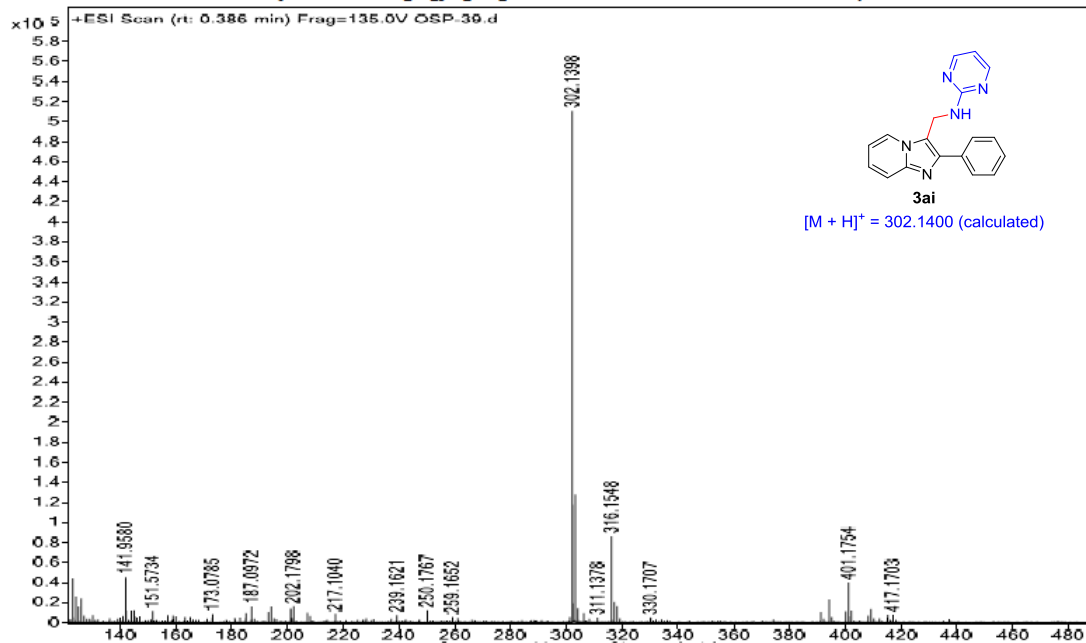

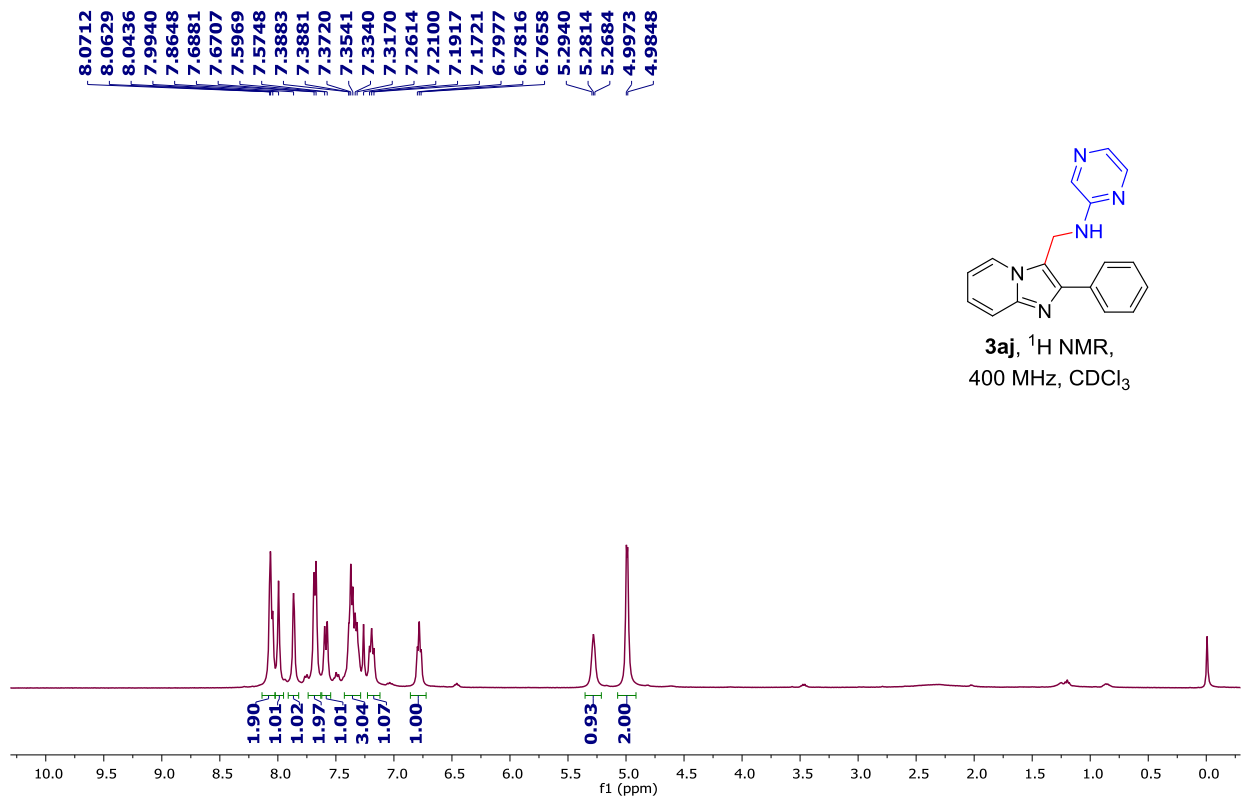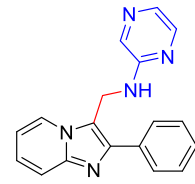

**3aj**,  $^1\text{H}$  NMR,  
400 MHz,  $\text{CDCl}_3$

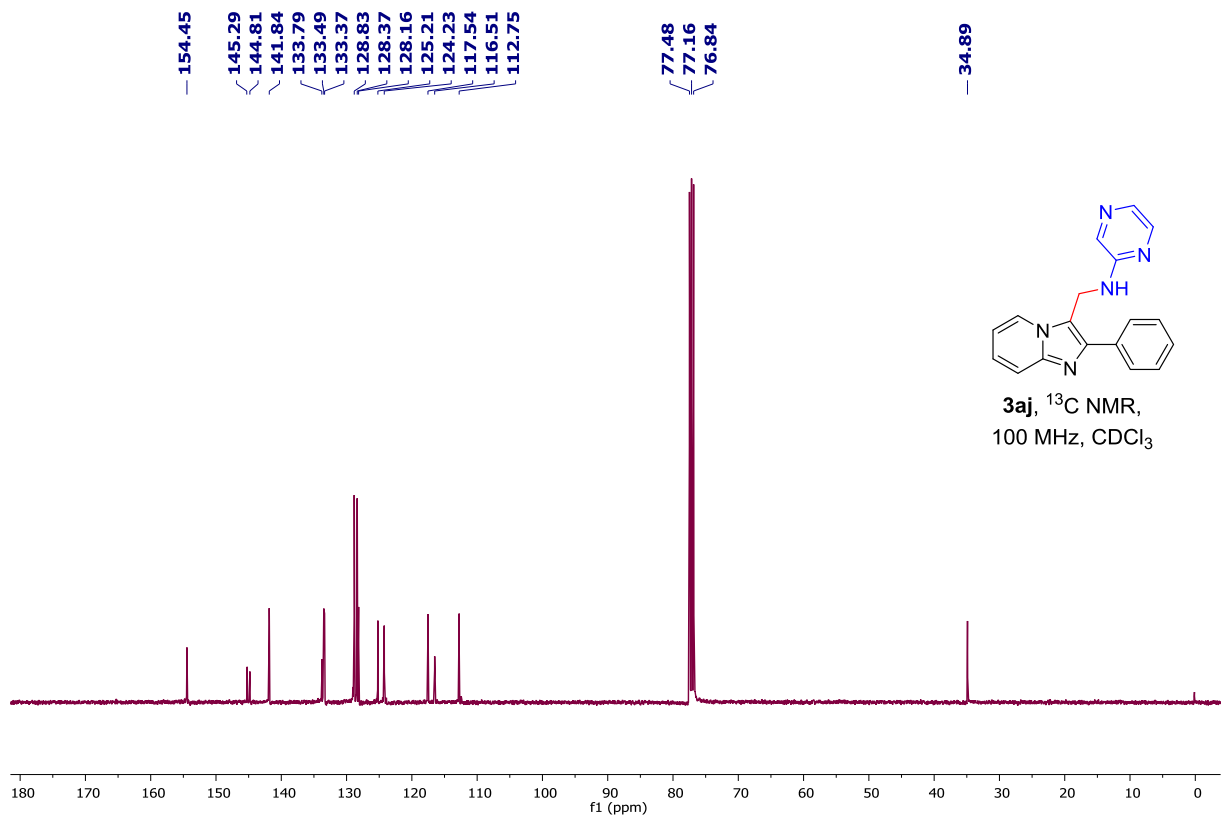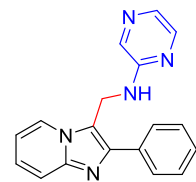

**3aj**,  $^{13}\text{C}$  NMR,  
100 MHz,  $\text{CDCl}_3$



|               |          |             |                      |                 |              |                        |                       |
|---------------|----------|-------------|----------------------|-----------------|--------------|------------------------|-----------------------|
| Sample Name   | OSP-40   | Position    | P2-F2                | Instrument Name | Instrument 1 | User Name              |                       |
| Inj Vol       | 0.2      | InjPosition |                      | SampleType      | Sample       | IRM Calibration Status | Success               |
| Data Filename | OSP-40.d | ACQ Method  | water_acn_grad_6min_ | Comment         |              | Acquired Time          | 10/12/2017 5:16:07 PM |

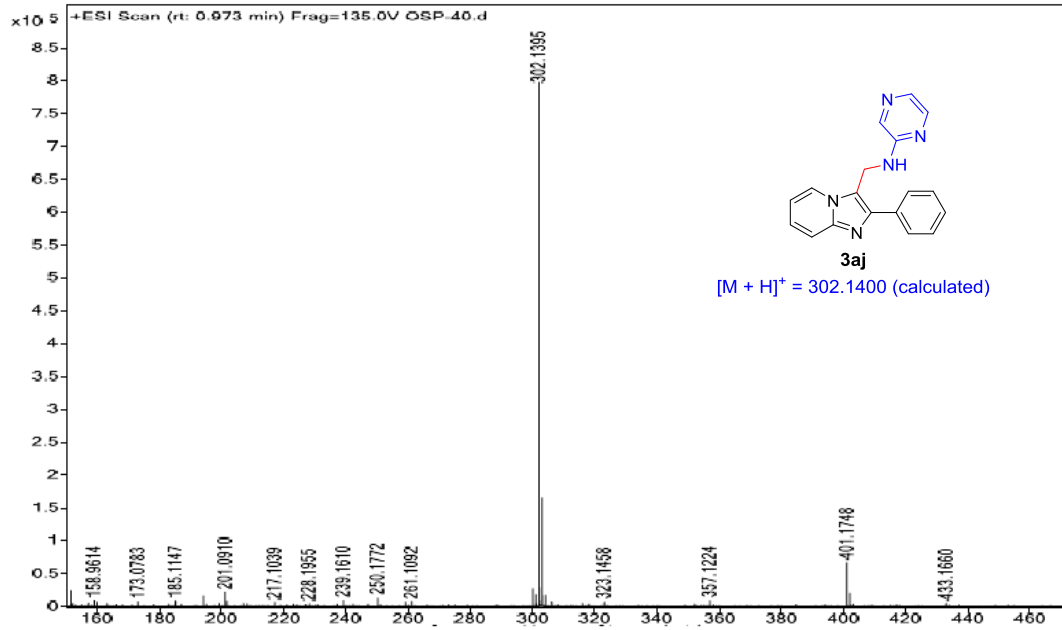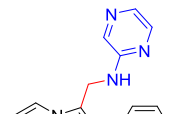

**3aj**  
 $[M + H]^+ = 302.1400$  (calculated)

OSP-101A pyridinyl amide/2  
 OSP-101-A

9.2229 8.4136 8.3926 8.1297 8.1250 8.1170 8.1126 7.9331 7.9304 7.9265 7.9180 7.9129 7.9088 7.7525 7.7478 7.7341 7.7304 7.7268 7.7131 7.7084 7.5595 7.5560 7.5470 7.5411 7.5357 7.5261 7.5227 7.5193 7.4766 7.4724 7.4608 7.4569 7.4392 7.2600 7.0251 7.0126 7.0074 6.9947

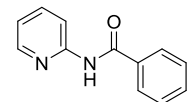

**5a**,  $^1H$  NMR,  
 400 MHz,  $CDCl_3$

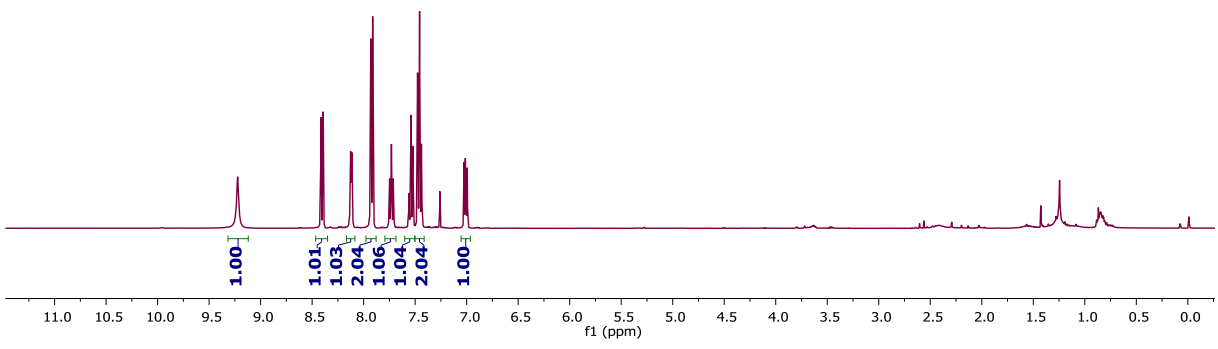

OSP-101A pyridinyl amide/10  
OSP-101-A

— 166.11  
— 151.84  
— 147.88  
/ 138.57  
/ 134.48  
/ 132.26  
/ 128.85  
/ 127.43  
— 119.94  
— 114.45

{ 77.48  
77.16  
76.84

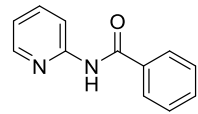

**5a**,  $^{13}\text{C}$  NMR,  
100 MHz,  $\text{CDCl}_3$

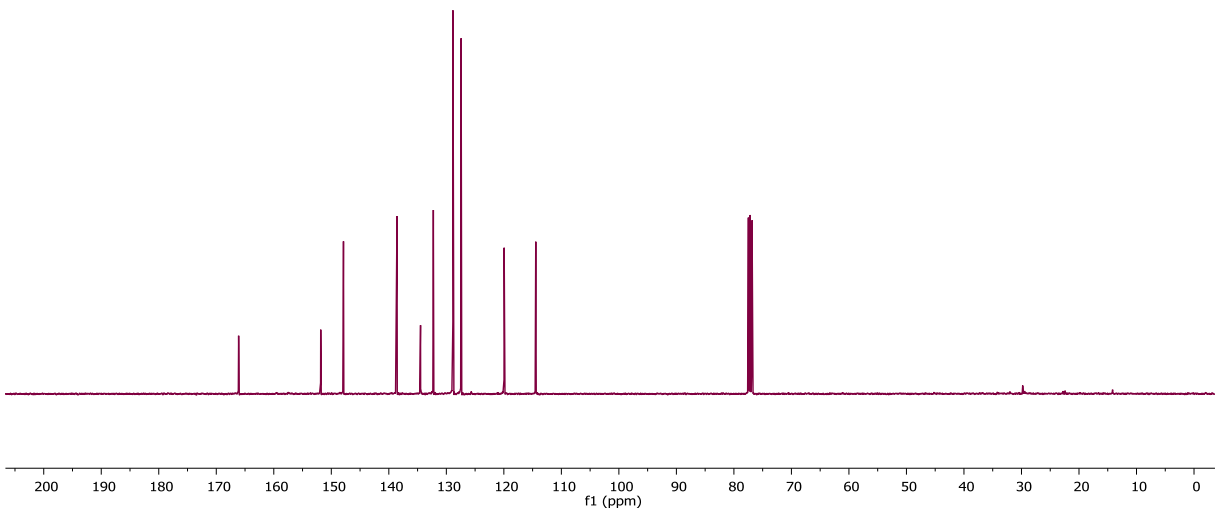

| Sample Name   | OSP-101A   | Position    | P2-D7                | Instrument Name | Instrument 1 | User Name              |                      |
|---------------|------------|-------------|----------------------|-----------------|--------------|------------------------|----------------------|
| Inj Vol       | 1          | InjPosition |                      | SampleType      | Sample       | IRM Calibration Status | Success              |
| Data Filename | OSP-101A.d | ACQ Method  | water_acq_grad_6min_ | Comment         |              | Acquired Time          | 4/12/2018 1:12:57 PM |

x10<sup>5</sup> +ESI Scan (rt: 0.645 min) Frag=135.0V OSP-101A.d

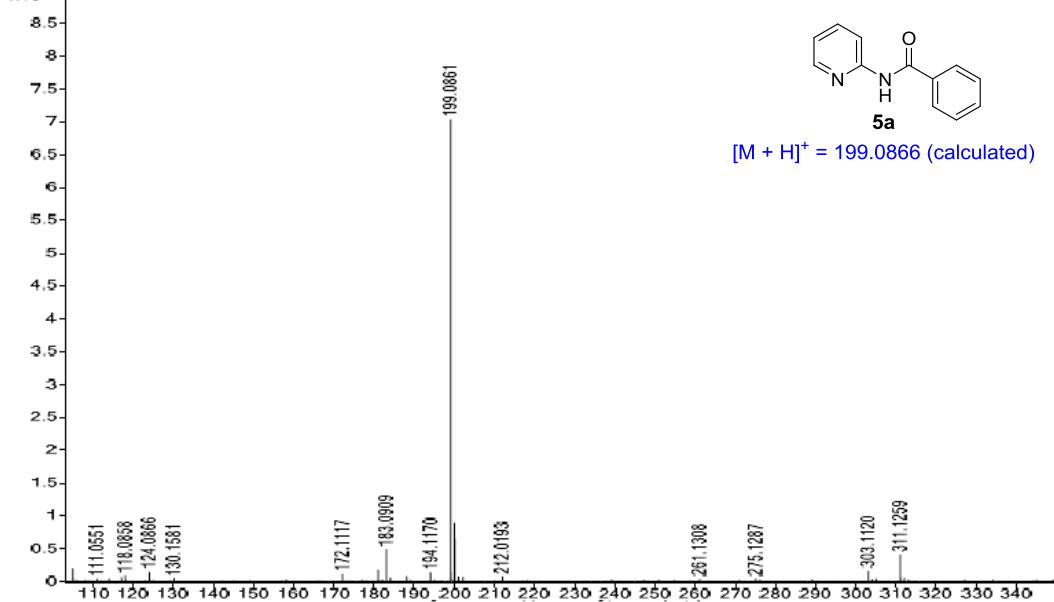

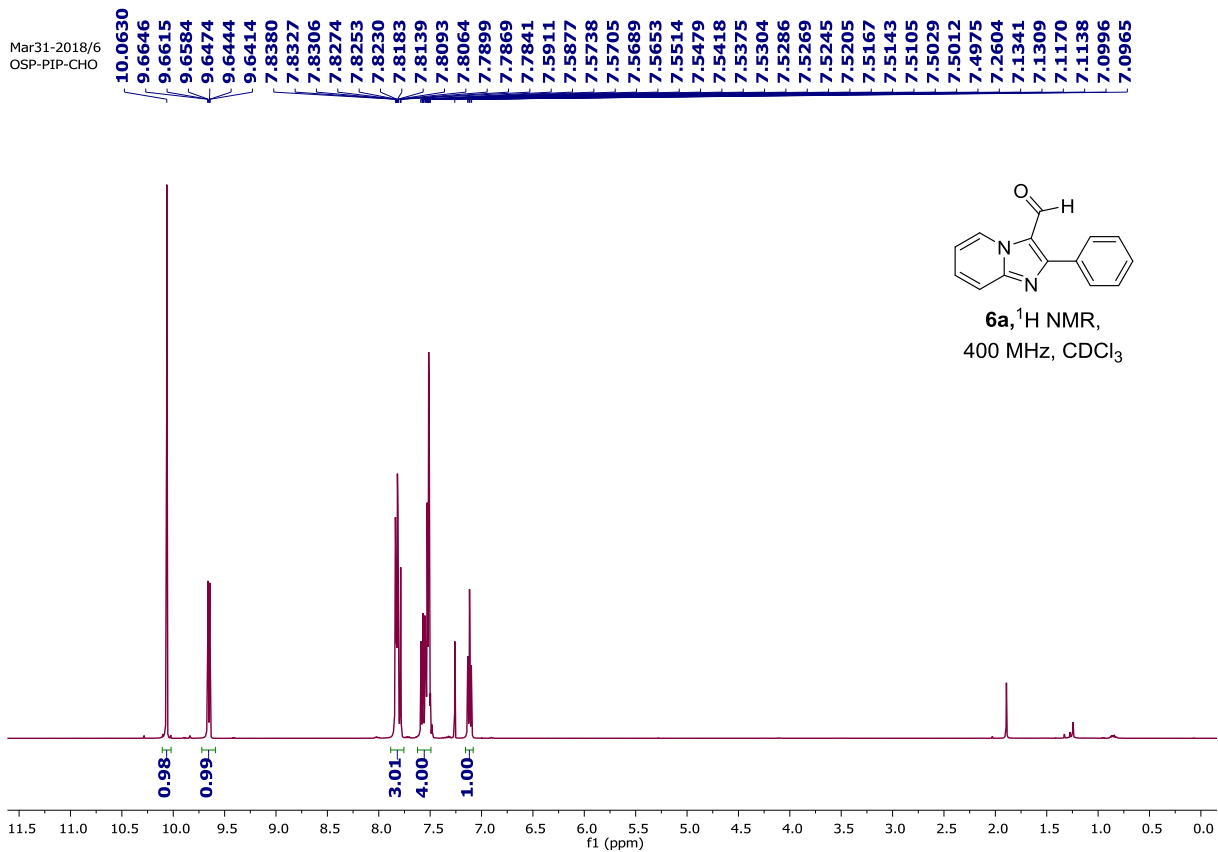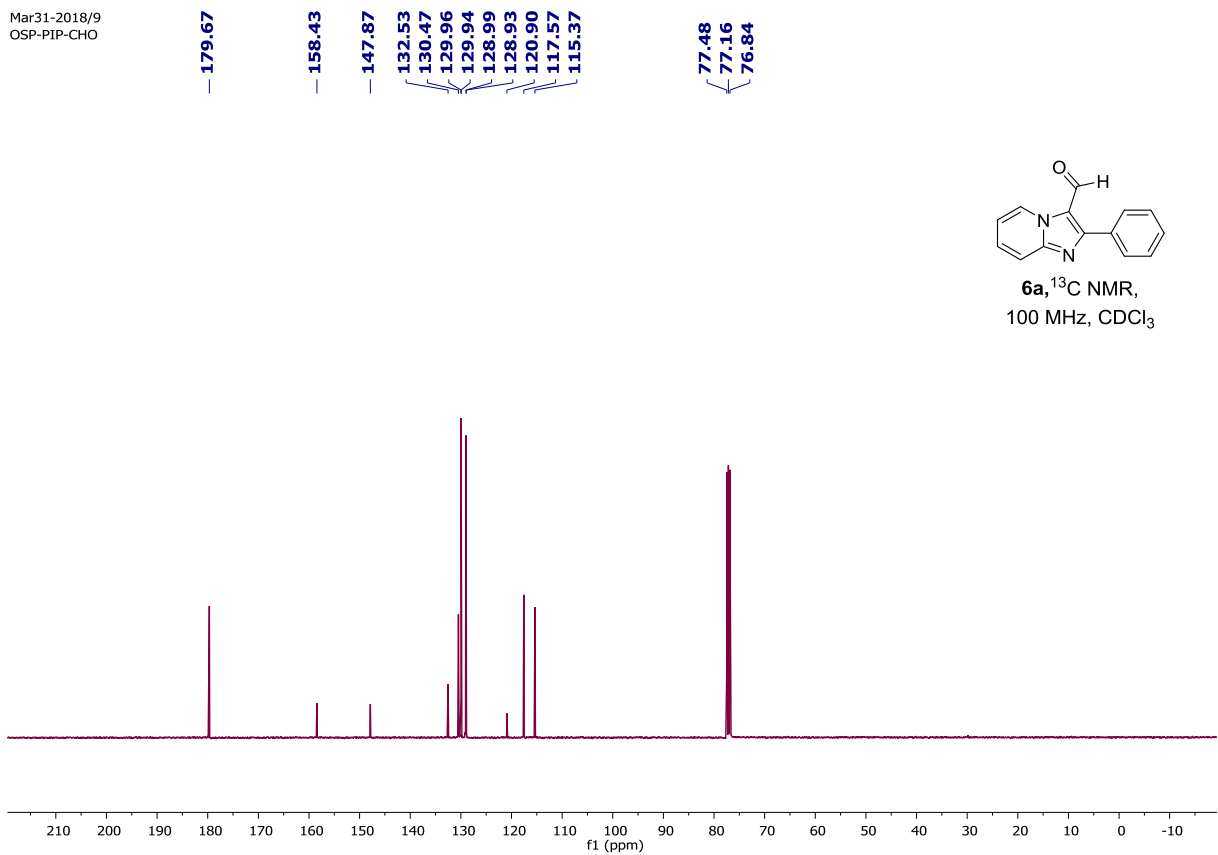

|               |               |             |                      |                 |              |                        |                     |
|---------------|---------------|-------------|----------------------|-----------------|--------------|------------------------|---------------------|
| Sample Name   | OSP-PIP-CHO   | Position    | P1-B9                | Instrument Name | Instrument 1 | User Name              |                     |
| Inj Vol       | 0.25          | InjPosition |                      | SampleType      | Sample       | IRM Calibration Status | Success             |
| Data Filename | OSP-PIP-CHO.d | ACQ Method  | water_acn_grad_6min_ | Comment         |              | Acquired Time          | 4/3/2018 1:20:08 PM |

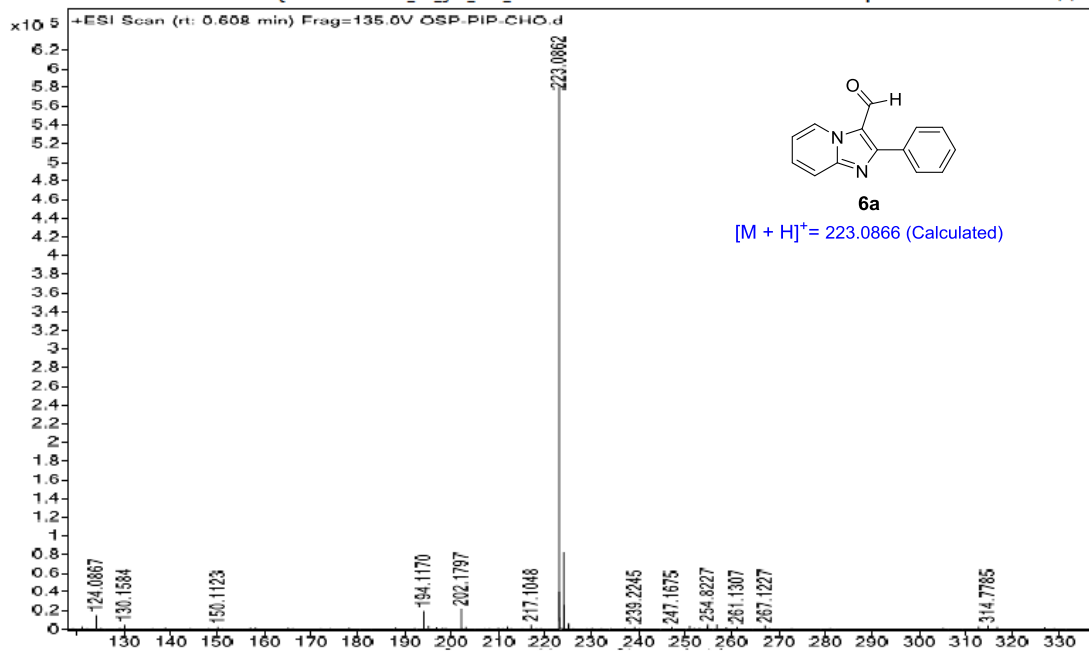

7.7929  
 7.7735  
 7.5424  
 7.5320  
 7.5188  
 7.5136  
 7.4956  
 7.4467  
 7.4319  
 7.4272  
 7.4099  
 7.3443  
 7.3274  
 7.2599  
 7.0717  
 7.0531  
 7.0326  
 6.4871  
 6.4703  
 6.4535  
 4.9971

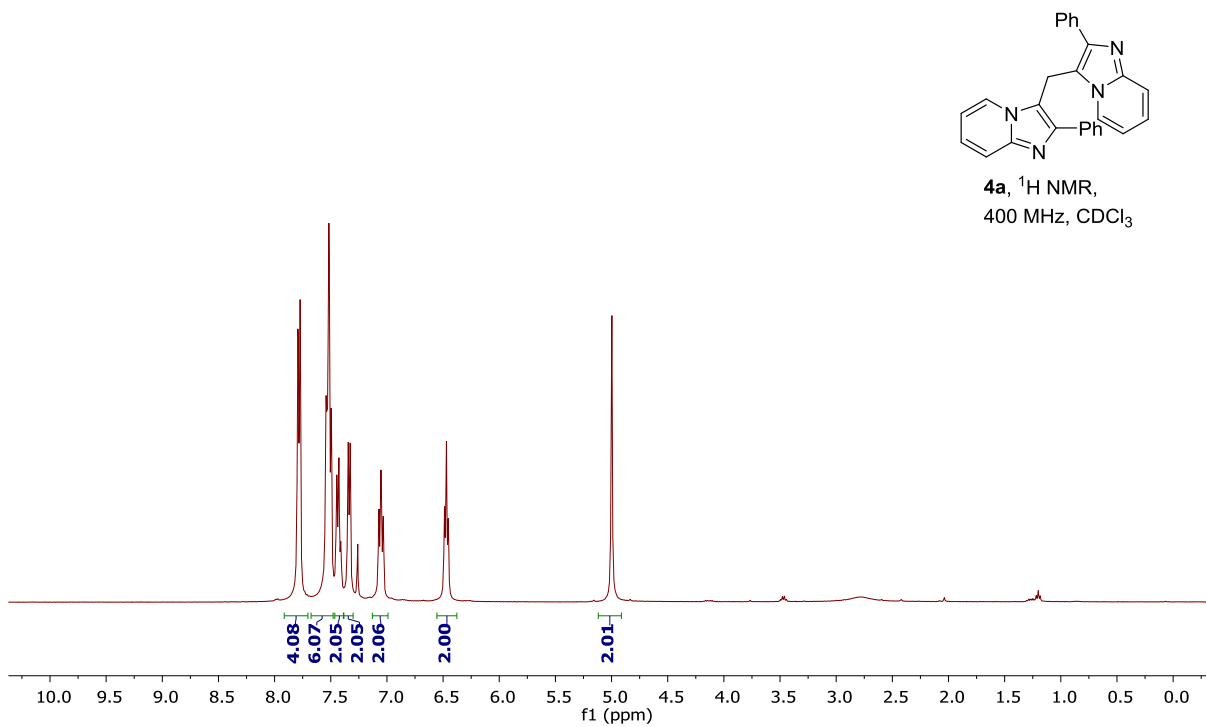

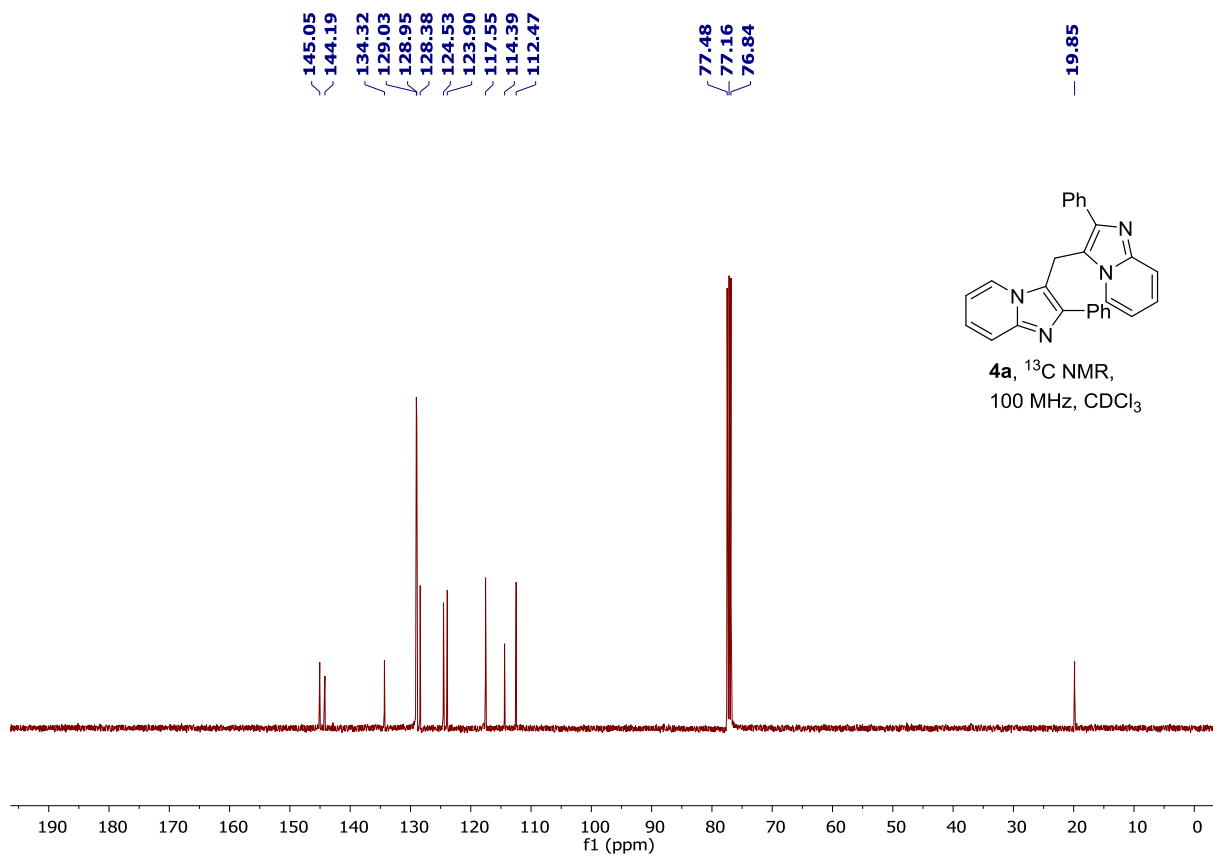

| Sample Name   | OSP-PIP-CHO   | Position    | P2-D10               | Instrument Name | Instrument 1 | User Name     | IRM Calibration Status | Success              |
|---------------|---------------|-------------|----------------------|-----------------|--------------|---------------|------------------------|----------------------|
| Inj Vol       | 1             | InjPosition |                      | SampleType      | Sample       |               |                        |                      |
| Data Filename | OSP-PIP-CHO.d | ACQ Method  | water_acn_grad_6min_ | Comment         |              | Acquired Time |                        | 4/12/2018 4:38:25 PM |

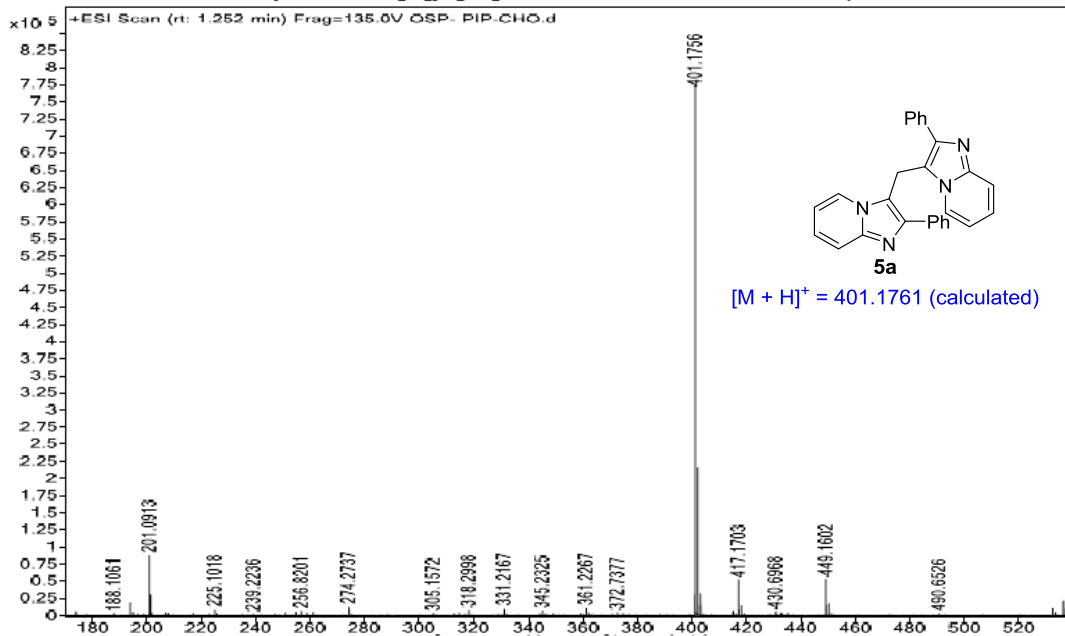

Mar31-2018/7  
OSP-PIP-CH3

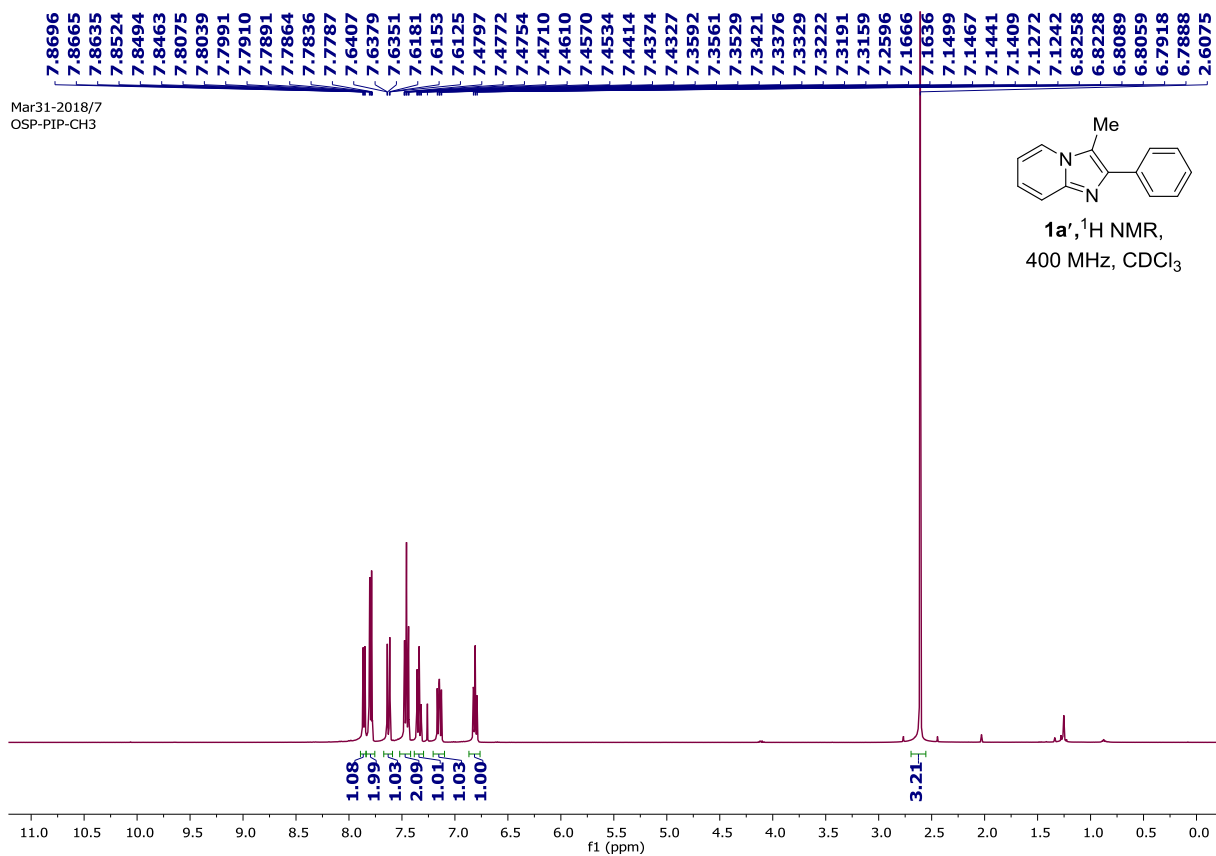

Mar31-2018/10  
OSP-PIP-CH3

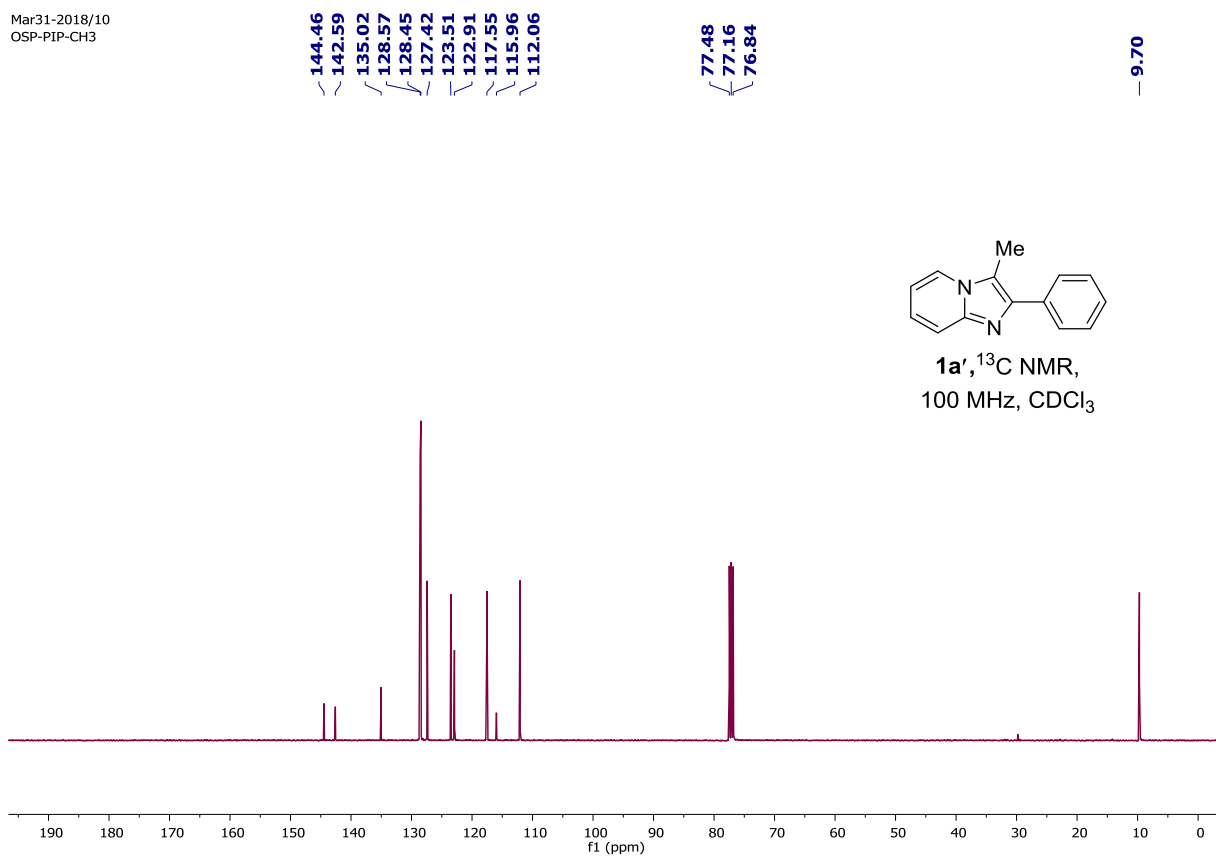

|               |               |             |                      |                 |              |                        |                     |
|---------------|---------------|-------------|----------------------|-----------------|--------------|------------------------|---------------------|
| Sample Name   | OSP-PIP-CH3   | Position    | P1-88                | Instrument Name | Instrument 1 | User Name              |                     |
| Inj Vol       | 0.25          | InjPosition |                      | SampleType      | Sample       | IRM Calibration Status | Success             |
| Data Filename | OSP-PIP-CH3.d | ACQ Method  | water_acn_grad_6min_ | Comment         |              | Acquired Time          | 4/3/2018 1:06:00 PM |

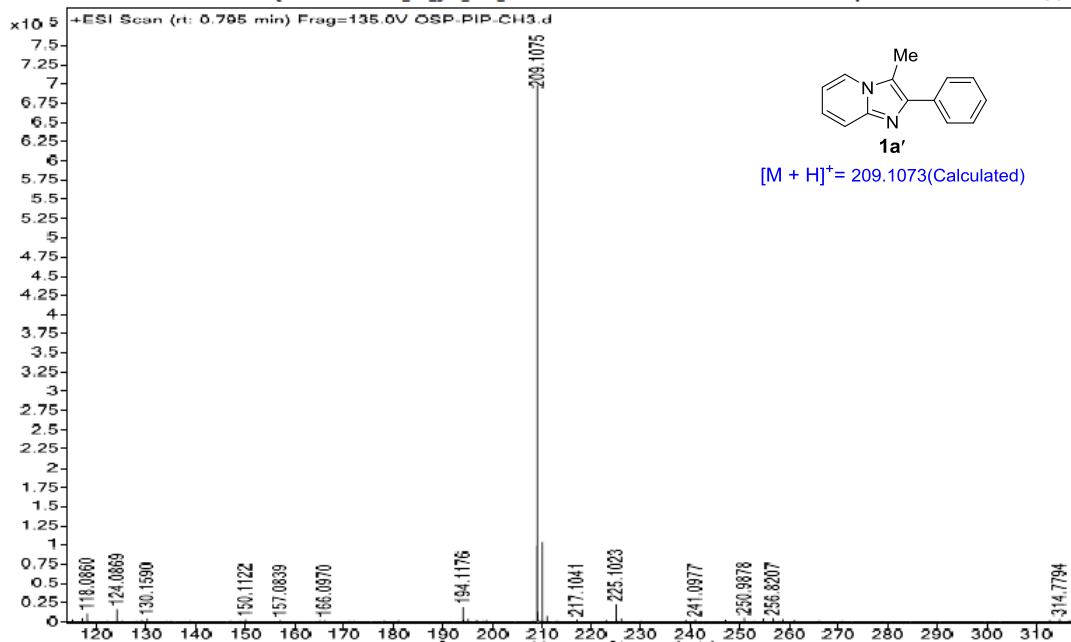

Supplement: c8ob02432d1.pdf [file c8ob02432d1.pdf]
